# Supplementary material for: Transcriptional and Physiological Analyses to Assess the Effects of a Novel Biostimulant in Tomato
Source: Front Plant Sci. 2022 Jan 11;12:781993. doi: 10.3389/fpls.2021.781993 (PMC8787302; doi:10.3389/fpls.2021.781993)
Supplement: Supplementary file 3 [file Table_2.xlsx]

## Sheet: Supplementary table 2
Supplementary table 2. Gene Ontology enrichment analysis of DEGs after SOB01 treatment. Biological process, molecular function and cellular component GO terms, obtained with ShinyGO online tool, for down-regulated DEGs (blue) and up-regulated DEGs (red) (adj-p < 0.1 and log2FC < -1) in SOB01 treated plants compared to the untreated ones.
NCBI GeneID:	BaseMean	log2FC	p-value	adj-p	NCBI ID	Functional Annotation
GeneID:101263441	171.877	-8.24563	5.49283e-08	0.000246958	101263441	cysteine proteinase VPE3 precursor	BIOLOGICAL PROCESS for down-regulated DEGs (adj-p < 0.1 and log2FC < -1)
GeneID:101259916	67.3837	-6.94535	3.30535e-07	0.000667819	101259916	uncharacterized protein LOC101259916	Enrichment FDR	Genes in list	Total genes	Fold enrichment	Functional Category	Genes
GeneID:101252505	89.7541	-6.77252	2.90161e-07	0.000667819	101252505	cysteine proteinase 3 precursor	0.00481036	62	3229	0.686502	Biological regulation	543669 101264242 101263243 101251323 101266760 101245105 101262055 101268620 101266385 101246587 101243963 543984 101252070 101250978 543870 101249062 101259036 101260346 101254900 101268768 101261532 543668 544052 101263533 101258170 101259273 101250433 101252312 101260188 544131 543567 543830 543575 101247413 101257995 544054 104649423 101245401 101257028 101260897 101248357 101263479 101254575…
GeneID:101258429	140.864	-5.88614	3.71341e-07	0.000667819	101258429	auxin repressed/dormancy associated protein	0.00481036	58	2958	0.701048	Regulation of biological process	543669 101264242 101263243 101251323 101266760 101245105 101262055 101268620 101266385 101246587 101243963 543984 101250978 543870 101249062 101259036 101254900 101268768 101261532 543668 544052 101258170 101259273 101250433 101252312 101260188 544131 543567 543830 543575 101247413 101257995 544054 104649423 101245401 101257028 101260897 101248357 101263479 101254575 101247122 101245758 101264624…
GeneID:101262912	64.1503	-6.8716	4.94639e-07	0.000741299	101262912	serine decarboxylase	0.00481036	50	2422	0.738098	Macromolecule modification	101245581 101259670 101266760 101245105 101249862 778250 101268620 101256451 101255255 101244048 101259099 101252072 101261009 543870 101249062 101262710 543810 101264008 101268866 101268768 101245672 101250433 101252521 101260872 101260188 101268442 101256935 101247705 101266615 101268431 101254846 101055606 100135704 101253040 101251138 101264006 101256774 101247018 101248778 101262634 543923 1…
GeneID:101247541	59.4019	-7.68814	7.74349e-07	0.000994707	101247541	protein translation factor SUI1 homolog	0.000313797	65	3010	0.772085	Cellular protein metabolic process	543669 101245581 101259670 101266760 101245105 101249862 101260768 778250 101268620 101256451 101247980 101255255 101244048 101259099 101255960 101267290 101252072 101261009 543870 101249062 101262710 543810 101264008 101268866 101268768 543668 101245672 778235 101250433 101252521 101262151 101260872 101260188 101268442 101256935 101259021 101247705 101266615 101268431 778284 101254846 101055606 …
GeneID:101266879	77.5631	-6.55597	1.39138e-06	0.00139014	101266879	non-specific lipid-transfer protein 2	0.000123748	75	3468	0.773215	Protein metabolic process	543669 101245581 101259670 101266760 101245105 101249862 101260768 778250 101268620 101256451 101247980 101255255 101244048 101259099 101255960 101267290 101252072 101261009 543870 101249062 101262710 543810 101247819 101261813 101264008 101268866 101268768 543668 101245672 778235 101250433 101255908 101252521 101262151 101258307 101260872 101260188 101268442 101256935 101259021 101247705 1012666…
GeneID:101260459	171.91	-5.93215	1.67042e-06	0.00150204	101260459	hornerin	0.00481036	43	1982	0.77568	Phosphorus metabolic process	101245581 101252120 101266760 101245105 101249862 101268620 100316899 101255255 101252072 543870 101246135 101255294 101264008 101268866 101263711 543819 101268768 101250126 101245672 101250433 101252521 101252123 101260188 101268442 101256935 101249338 544095 101254537 101254846 101253040 101251456 101260137 101247018 101248778 101262634 543923 101262833 101258773 101266670 543567 101262592 1012…
GeneID:101248778	54.9708	-6.06592	2.14602e-06	0.00175427	101248778	protein phosphatase 2C 37	0.00460337	43	1965	0.782391	Phosphate-containing compound metabolic process	101245581 101252120 101266760 101245105 101249862 101268620 100316899 101255255 101252072 543870 101246135 101255294 101264008 101268866 101263711 543819 101268768 101250126 101245672 101250433 101252521 101252123 101260188 101268442 101256935 101249338 544095 101254537 101254846 101253040 101251456 101260137 101247018 101248778 101262634 543923 101262833 101258773 101266670 543567 101262592 1012…
GeneID:101055516	56.2876	-7.58375	3.44419e-06	0.00207264	101055516	Hop-interacting protein THI026	0.00136505	47	2074	0.810228	Localization	101260768 101253727 101253030 543737 101261699 101267983 101247318 101244486 101260346 101257981 101256196 778317 101245861 101263533 101261344 101259184 101264966 101252521 101265483 101268442 101265986 101248833 101248942 543830 543575 101247586 101260078 101268620 101266875 101260888 101259125 101261607 101055566 101258746 101264626 101262117 101248490 101260946 101247934 101268015 101251423 1…
GeneID:104648634	52.4677	-5.59232	5.69379e-06	0.00289893	104648634	uncharacterized protein LOC104648634	0.00154736	45	1981	0.812168	Establishment of localization	101260768 101253727 101253030 543737 101261699 101267983 101247318 101244486 101260346 101257981 101256196 778317 101263533 101261344 101259184 101264966 101252521 101265483 101268442 101265986 101248833 101248942 543575 101247586 101260078 101268620 101266875 101260888 101259125 101261607 101055566 101258746 101264626 101262117 101248490 101260946 101247934 101268015 101251423 101266080 10124443…
GeneID:543830	36.8904	-6.99913	9.73829e-06	0.00324321	543830		0.00114455	49	2148	0.815605	Protein modification process	101245581 101259670 101266760 101245105 101249862 778250 101268620 101256451 101255255 101244048 101259099 101252072 101261009 543870 101249062 101262710 543810 101264008 101268866 101268768 101245672 101250433 101252521 101260872 101260188 101268442 101256935 101247705 101266615 101268431 101254846 101055606 101253040 101251138 101264006 101256774 101247018 101248778 101262634 543923 101262833 7…
GeneID:101252268	72.782	-5.09032	9.04828e-06	0.00324321	101252268	probable serine incorporator	0.00114455	49	2148	0.815605	Cellular protein modification process	101245581 101259670 101266760 101245105 101249862 778250 101268620 101256451 101255255 101244048 101259099 101252072 101261009 543870 101249062 101262710 543810 101264008 101268866 101268768 101245672 101250433 101252521 101260872 101260188 101268442 101256935 101247705 101266615 101268431 101254846 101055606 101253040 101251138 101264006 101256774 101247018 101248778 101262634 543923 101262833 7…
GeneID:544228	43.8587	-5.74528	1.07299e-05	0.00339296	544228	EIL2 protein	0.00136505	45	1960	0.82087	Transport	101260768 101253727 101253030 543737 101261699 101267983 101247318 101244486 101260346 101257981 101256196 778317 101263533 101261344 101259184 101264966 101252521 101265483 101268442 101265986 101248833 101248942 543575 101247586 101260078 101268620 101266875 101260888 101259125 101261607 101055566 101258746 101264626 101262117 101248490 101260946 101247934 101268015 101251423 101266080 10124443…
GeneID:101252850	46.3309	-5.41183	1.09426e-05	0.00339296	101252850	UPF0426 protein At1g28150, chloroplastic	3.82148e-08	99	4276	0.827781	Organonitrogen compound metabolic process	543669 101245581 101259670 101252120 101266760 101245105 101249862 101260768 778250 101268620 101256451 101247980 101255255 101244048 101259099 101255960 101267290 101253978 101252072 543718 101261009 543870 101249062 101247807 101262710 543810 101246135 101247819 101255294 101261813 101264008 101268866 101268768 101250126 543668 101251394 101252005 101245672 778235 101250433 101255908 101252521 …
GeneID:101244581	69.299	-4.8506	1.67698e-05	0.0047123	101244581	uncharacterized protein LOC101244581	0.00016273	53	2184	0.867643	Response to stimulus	101264242 544054 101263243 101251323 101245105 101268620 101244450 101266385 544149 101243963 543984 543870 101260346 101254900 101251684 544052 101250433 101258486 101265483 101260873 101260188 544131 101265986 543567 543575 101247413 544084 101247368 104649423 101257028 101260897 101251644 101248357 101246396 101263479 100134877 101247122 101265910 543806 101264616 101266019 101245758 101268572…
GeneID:101257995	35.9603	-6.94587	2.19067e-05	0.00569531	101257995	nuclear transcription factor Y subunit A-10	0.00501183	21	704	1.06651	Developmental process	101266385 101264810 101260346 101254900 101255895 101261532 544052 101247413 101260078 101268620 101257028 101263479 101254575 101247122 101250978 100736464 101268572 101244486 543542 101264734 101261641
GeneID:101261737	40.5712	-6.17802	2.47887e-05	0.00569531	101261737	alpha/beta-Hydrolases superfamily protein precursor	0.000123748	28	784	1.27691	Response to chemical	101264242 544054 101251323 101245105 101260346 544052 101265483 101260188 101265986 543567 544084 101247368 101268620 101257028 101260897 101251644 101246396 100134877 101243963 101265910 543806 101245758 101268572 101252187 543542 101262822 101247578 101267475
GeneID:101255509	36.4449	-6.03705	2.42472e-05	0.00569531	101255509	glutaredoxin-C9	0.00117653	20	549	1.30249	Positive regulation of biological process	543669 101266385 101246587 101243963 101249062 101259036 101254900 101268768 543668 544052 101258170 101259273 101268620 101257028 101263479 101247122 101268572 543542 101268236 101247413
GeneID:101248067	35.7791	-6.00838	2.40755e-05	0.00569531	101248067	deSI-like protein At4g17486	0.00114455	18	454	1.41754	Response to abiotic stimulus	101244450 101266385 101243963 101260346 101254900 544052 101260873 101247413 544054 101268620 101257028 101263479 101247122 101268572 101248484 101262822 101247578 101251157
GeneID:101263243	33.7907	-5.93516	2.3003e-05	0.00569531	101263243	rapid alkalinization factor	0.00136505	16	390	1.46681	Response to oxygen-containing compound	544054 101245105 101260346 544052 101260188 543567 101268620 101257028 101260897 101251644 100134877 101243963 101245758 101268572 101262822 101267475
GeneID:101260997	33.229	-5.90106	3.18101e-05	0.00624482	101260997	cellulose synthase-like protein G2	0.00136505	16	379	1.50938	Cellular response to chemical stimulus	101264242 544054 101251323 101245105 544052 101260188 543567 544084 101268620 101257028 101260897 101246396 543806 101245758 543542 101267475
GeneID:101263830	30.668	-5.79032	3.14896e-05	0.00624482	101263830	uncharacterized protein LOC101263830 isoform X1	0.00136505	11	192	2.04838	Response to inorganic substance	101264242 544054 101260346 544052 101251323 101268620 100134877 101265910 101268572 101262822 101247578
GeneID:101263592	29.2219	-5.73357	3.19464e-05	0.00624482	101263592	glyoxysomal fatty acid beta-oxidation multifunctional protein MFP-a isoform X1	0.00136505	11	187	2.10314	Sulfur compound metabolic process	101252120 100134877 101246135 101250126 101251394 101262559 101255136 101249537 101257028 101252070 101259420
GeneID:101251046	69.3516	-4.71036	3.17478e-05	0.00624482	101251046	ubiquitin-conjugating enzyme E2 variant 1D	0.00227427	9	136	2.36604	Regulation of developmental process	101266385 101254900 101261532 544052 101247413 101263479 101254575 101247122 543542
GeneID:101249175	32.981	-6.80772	3.72588e-05	0.00639338	101249175	cysteine proteinase inhibitor 5	0.00393557	8	115	2.4872	Regulation of multicellular organismal process	101266385 101254900 544052 101247413 101263479 101254575 101247122 543542
GeneID:101252644	38.0845	-6.09339	3.51073e-05	0.00639338	101252644	geraniol 8-hydroxylase	0.00299993	8	110	2.60025	Regulation of multicellular organismal development	101266385 101254900 544052 101247413 101263479 101254575 101247122 543542
GeneID:101246587	30.1752	-5.77759	3.72582e-05	0.00639338	101246587	serine/arginine-rich splicing factor SR45a	0.00136505	7	70	3.57535	Response to metal ion	101264242 101260346 544052 544054 101251323 101265910 101247578
GeneID:101262878	49.0132	-5.17579	3.61813e-05	0.00639338	101262878	THO complex subunit 4A	0.00501183	4	22	6.50063	Response to iron ion	101264242 101260346 544052 544054
GeneID:101264390	59.0887	-4.98227	3.47783e-05	0.00639338	101264390	pollen-specific leucine-rich repeat extensin-like protein 1	0.000213299	6	29	7.39727	Positive regulation of developmental process	101266385 101254900 544052 101263479 101247122 543542
GeneID:544052	146.448	-4.68124	3.51096e-05	0.00639338	544052		0.00114455	5	24	7.44864	Positive regulation of post-embryonic development	101266385 101254900 544052 101263479 101247122
GeneID:101251848	114.605	-5.36326	4.04571e-05	0.00661437	101251848	glutaredoxin-C6	0.00016273	6	27	7.94521	Positive regulation of multicellular organismal process	101266385 101254900 544052 101263479 101247122 543542
GeneID:101251018	24.7647	-6.41699	5.22196e-05	0.00767645	101251018	cellulose synthase-like protein G3
GeneID:101252072	33.8126	-5.92106	5.13061e-05	0.00767645	101252072	leucine-rich repeat receptor-like serine/threonine/tyrosine-protein kinase SOBIR1 precursor	Total genes	795	28424
GeneID:100316894	37.088	-5.08004	5.17495e-05	0.00767645	100316894	protein phosphatase 2C ABI2 homolog isoform X1
GeneID:101248302	184.612	-4.29449	4.92373e-05	0.00767645	101248302	40S ribosomal protein S26-3
GeneID:101255251	26.1186	-6.47802	5.85775e-05	0.00798074	101255251	transcription factor bHLH84-like	MOLECULAR FUNCTION for down-regulated DEGs (adj-p < 0.1 and log2FC < -1)
GeneID:101250778	66.2886	-4.51122	5.77186e-05	0.00798074	101250778	60S ribosomal protein L28-1	Enrichment FDR	Genes in list	Total genes	Fold enrichment	Functional Category	Genes
GeneID:101255122	51.4648	-5.5461	6.07057e-05	0.00814725	101255122	protein TWIN LOV 1-like isoform X2	0.0383561	59	3298	0.639616	Transferase activity	101245581 101259670 544095 101244237 101249862 101259986 101268620 100316899 101255255 101244048 101260997 101253978 101263679 101252072 101252070 101261009 543870 101249062 101262710 543810 101246135 101255294 101264008 101268866 101268768 101245672 101250433 101262151 101260872 101260188 101261977 101256935 101266615 101255122 101254537 100135704 101251138 101251751 101256176 101254478 10073646…
GeneID:101253788	77.8536	-4.90209	6.22118e-05	0.00818243	101253788	acidic endochitinase	0.00150915	53	2399	0.789885	Cation binding	544054 543941 101255927 543984 101252070 101260346 101267131 544084 778312 544095 101264862 101264764 100316899 101266875 101256451 101253040 100134877 100736526 101254575 101265910 543718 101258933 101249062 101259036 101262304 101256280 101248778 101248484 101254698 101244006 543819 101251394 101259267 544052 101263533 101261344 101254223 101267831 101259970 101258781 101255136 101245795 109121…
GeneID:101248563	43.0606	-4.72496	6.27878e-05	0.00818243	101248563	signal recognition particle 54 kDa protein 1	0.00144681	53	2361	0.802598	Metal ion binding	544054 543941 101255927 543984 101252070 101260346 101267131 544084 778312 544095 101264862 101264764 100316899 101266875 101256451 101253040 100134877 100736526 101254575 101265910 543718 101258933 101249062 101259036 101262304 101256280 101248778 101248484 101254698 101244006 543819 101251394 101259267 544052 101263533 101261344 101254223 101267831 101259970 101258781 101255136 101245795 109121…
GeneID:101268277	30.9751	-5.80188	6.7301e-05	0.0085327	101268277	lipid phosphate phosphatase 2-like	0.000282156	56	2361	0.848028	Catalytic activity, acting on a protein	101245581 101268431 101249862 101260768 778250 101268620 101247980 101255255 101244048 101265910 101252072 101261009 101257552 543870 101249062 101262710 543810 101261813 101264008 101268866 101268768 101245672 543923 101250433 101255908 101252312 101262151 101258307 101260872 101260188 101256935 101266615 101255122 543727 108348021 101257896 101254846 101261866 101253040 101259036 101247819 1012…
GeneID:101258002	27.8666	-5.65272	7.02202e-05	0.0085327	101258002	aldo-keto reductase 1	0.0272767	15	460	1.16587	Protein serine/threonine kinase activity	101245581 101249862 101268620 101252072 543870 101268768 101245672 101250433 101260188 101256935 101255255 101264008 101268866 101252521 101251157
GeneID:101267703	44.3104	-4.77342	6.94063e-05	0.0085327	101267703	cytochrome P450 CYP82D47	0.0453118	10	267	1.33908	Ubiquitin-like protein transferase activity	101244048 101261009 101249062 101262710 543810 101262151 101260872 101266615 101256774 101262653
GeneID:101250433	26.3222	-6.49498	7.34078e-05	0.00873996	101250433	serine/threonine-protein kinase SAPK3	0.0383561	10	252	1.41879	Calcium ion binding	543941 101255927 543984 101267131 101264862 101262304 543819 101263533 101260188 544131
GeneID:101253496	42.8499	-4.72591	7.38698e-05	0.00873996	101253496	vesicle-associated membrane protein 714-like	0.0272767	10	230	1.5545	Isomerase activity	101256710 101268431 778250 101253766 101250512 101256451 101260137 101257677 101266358 101255071
GeneID:100529140	52.3443	-4.60878	7.70075e-05	0.00892775	100529140	LOV/LOV protein isoform X4	0.0120915	9	163	1.97412	Phosphoprotein phosphatase activity	101257552 543923 101254846 101253040 101247018 101248778 101254698 101262833 101262592
GeneID:101266080	148.035	-4.45356	7.74427e-05	0.00892775	101266080	non-specific lipid-transfer protein 2-like precursor	0.0497354	4	43	3.3259	Intramolecular oxidoreductase activity	101256710 101250512 101256451 101260137
GeneID:112941110	38.0328	-5.12588	8.00047e-05	0.00910494	112941110		0.0383561	4	38	3.76352	Ubiquitin-like protein conjugating enzyme activity	101244048 101262710 101260872 101266615
GeneID:104644839	31.9225	-6.73056	9.32166e-05	0.00922286	104644839	receptor-like protein 43	0.0383561	3	17	6.30943	Cyclin-dependent protein serine/threonine kinase activity	101249862 101268768 101245672
GeneID:101244006	23.0654	-6.3051	8.97603e-05	0.00922286	101244006	zinc finger family protein	0.0383561	3	17	6.30943	Cyclin-dependent protein kinase activity	101249862 101268768 101245672
GeneID:101256921	41.1818	-6.16646	8.45065e-05	0.00922286	101256921	phosphoglycerate mutase-like protein AT74	0.0453118	2	5	14.3014	Intramolecular oxidoreductase activity, transposing C=C bonds	101256710 101250512
GeneID:101055512	30.3576	-5.76398	9.09232e-05	0.00922286	101055512	Hop-interacting protein THI012	0.0120915	2	2	35.7535	Dodecenoyl-CoA delta-isomerase activity	101256710 101250512
GeneID:101265539	101.238	-5.62087	9.28732e-05	0.00922286	101265539	MDIS1-interacting receptor like kinase 2-like	0.0120915	2	2	35.7535	Enoyl-CoA hydratase activity	101256710 101250512
GeneID:101245344	40.8215	-4.9144	9.33363e-05	0.00922286	101245344	hypersensitive-induced reaction 1 protein
GeneID:101265967	40.735	-4.89962	9.09146e-05	0.00922286	101265967	protein CWC15 homolog
GeneID:101266760	39.1363	-4.85467	8.88571e-05	0.00922286	101266760	uncharacterized protein LOC101266760 isoform X2	CELLULAR COMPONENT for down-regulated DEGs (adj-p < 0.1 and log2FC < -1)
GeneID:544296	162.82	-4.34736	8.98848e-05	0.00922286	544296	subtilisin-like protease precursor	Enrichment FDR	Genes in list	Total genes	Fold enrichment	Functional Category	Genes
GeneID:101266119	47.6274	-5.82513	9.67475e-05	0.00935434	101266119	MDIS1-interacting receptor like kinase 2-like	8,31145431800599e-15	110	4064	0.967736	Cytoplasm	101264357 101258583 544054 101251323 101259670 101256710 101252120 101266760 101245105 101265773 101268431 543941 101255927 101253727 778284 778250 101268620 101247980 101253341 101259713 101254152 101255347 100134877 101260997 101255960 101267290 101253271 101252070 543718 543870 101249062 101251456 101247807 101257363 101246135 101247318 101264006 101255294 101256774 101250889 101260346 1012549…
GeneID:100147722	211.727	-3.86859	9.79081e-05	0.00936585	100147722	glutamate decarboxylase isoform2	1,20135813378523e-09	35	758	1.65089	Cytosol	101259670 101252120 101265773 101268431 101253727 778284 101259713 101254152 101267290 101253271 101247807 101246135 101250889 101248484 101248302 101268580 101262559 101252719 100147722 101259021 101249537 101259420 544054 778250 101268620 101250571 101260888 101263479 101254575 101265910 101261607 101262912 101247819 101256196 101265944
GeneID:101259868	33.3141	-5.3364	0.000102263	0.00967942	101259868	uncharacterized protein LOC101259868 isoform X1	4,6745992363861e-07	66	2634	0.895873	Nucleus	101255122 101245105 101249862 101253727 101262055 101268620 101266385 101246587 101267666 101244048 101259099 101243963 101254575 543984 101264810 101250978 543870 101259036 101256774 101254900 101251684 101244006 101255895 101255109 101268768 101261532 101257580 101245672 101245564 101247238 101259273 101250433 101252312 101264966 101262653 101243823 101258486 101256806 101245795 101265967 10126…
GeneID:101267831	21.685	-6.22399	0.000107688	0.00998283	101267831	flavonoid 3'-monooxygenase	1,2635113045057e-06	87	4040	0.769938	Intrinsic component of membrane	101253030 543737 101253978 101267983 101260946 104648156 101259184 101255908 101253552 101250247 101252419 101260078 101260171 101244994 101262660 101260768 100316899 101253750 101256736 101253341 101255255 101251138 101255347 101260997 101259125 101252072 101260417 101258933 101252268 101055566 101261699 101243980 101267985 101258746 101256280 101264925 101244370 101264006 101244486 101254097 10…
GeneID:101256774	24.766	-5.48531	0.000112417	0.0102106	101256774	U-box domain-containing protein 11	2,2052982915218e-06	85	3979	0.763771	Integral component of membrane	101253030 543737 101253978 101267983 101260946 101259184 101255908 101250247 101252419 101260078 101260171 101244994 101262660 101260768 100316899 101253750 101256736 101253341 101255255 101251138 101255347 101260997 101259125 101252072 101260417 101258933 101252268 101055566 101261699 101243980 101267985 101258746 101256280 101264925 101244370 101264006 101244486 101254097 101262117 101264013 10…
GeneID:101250512	24.5921	-5.46543	0.000112272	0.0102106	101250512	enoyl-CoA delta isomerase 2, peroxisomal	0,000144759182714994	34	1211	1.00381	Cell periphery	101258583 101245581 101268431 101259986 101253030 543737 101255255 101260997 101253061 101259125 101252072 101249542 101267983 101264008 101268866 101244486 543819 104648156 101257981 778320 109121167 101256935 101253552 543830 543575 101252464 101266760 101055606 101260888 101261607 101258746 101262912 101264734 101264038
GeneID:101253243	24.0795	-5.43303	0.000116624	0.0104868	101253243	protein LURP-one-related 10	0,000205536713309021	48	2055	0.835117	Protein-containing complex	101259670 101260768 101253727 778284 101246587 101259713 101254152 101267666 101259099 101264892 101255960 101267290 101254575 101253271 101261009 101249062 101259036 101246135 101264006 101248302 101268580 101268768 101263916 101257580 101256196 101247238 101265944 778235 101259273 101259184 101252312 101262559 101245795 101265967 101252123 101268517 101259021 101248942 101247586 101265365 10126…
GeneID:101252323	21.2949	-6.19049	0.000120628	0.0106482	101252323	cell number regulator 8	0,000234811501648554	12	210	2.04305	Endoplasmic reticulum membrane	101260768 100316899 101253978 101267983 101264006 101256196 101255908 101244994 101262660 101251644 101256736 101245758
GeneID:101252419	36.4159	-5.438	0.000125523	0.0106482	101252419	uncharacterized protein LOC101252419	0,000234811501648554	27	891	1.08344	Endomembrane system	101260768 101253727 100316899 101253341 101255347 101260997 101255960 101253978 101267983 101264006 101256196 101261344 101259184 101255908 101248833 101247586 101266615 101260078 101244994 101262660 101251644 101256736 101262304 101245758 101268572 101262822 101266358
GeneID:101245290	24.1209	-5.43557	0.000124604	0.0106482	101245290	lactoylglutathione lyase	0,000234811501648554	12	211	2.03337	Nuclear outer membrane-endoplasmic reticulum membrane network	101260768 100316899 101253978 101267983 101264006 101256196 101255908 101244994 101262660 101251644 101256736 101245758
GeneID:101266875	26.7402	-5.02158	0.000120787	0.0106482	101266875	heavy metal-associated isoprenylated plant protein 26	0,000753715989949842	27	958	1.00767	Plasma membrane	101245581 101268431 101259986 101253030 543737 101255255 101260997 101259125 101252072 101267983 101264008 101268866 101244486 543819 104648156 101257981 778320 101256935 101253552 543575 101252464 101266760 101055606 101261607 101258746 101262912 101264038
GeneID:101262055	107.067	-4.28665	0.000123614	0.0106482	101262055	mRNA turnover protein 4 homolog	0,00083677013221044	23	756	1.08774	Organelle membrane	101260768 100316899 101255960 101253978 101267983 101264006 101263916 101256196 101255908 101247974 101248942 101247586 101244994 101262660 101251644 101256736 101265910 101245758 101262117 101264734 101248490 101247934 101261344
GeneID:101262980	27.6986	-5.07378	0.000132638	0.0111465	101262980	protein SKIP34	0,00117514780113835	10	181	1.97533	Cytosolic ribosome	101259670 778284 101259713 101254152 101267290 101253271 101248302 101268580 101259021 101252719
GeneID:101267337	27.5739	-5.06521	0.000146976	0.0122371	101267337	putative 26S proteasome subunit	0,00253508585885354	16	463	1.23554	Ribonucleoprotein complex	778284 101246587 101259713 101254152 101267666 101264892 101267290 101254575 101253271 101248302 101268580 101257580 101265967 101268517 101259021 101252719
GeneID:101255726	19.0605	-6.04216	0.000151401	0.0123764	101255726	uncharacterized protein LOC101255726	0,00671760913475932	7	114	2.19539	Cytosolic large ribosomal subunit	778284 101259713 101254152 101267290 101253271 101268580 101259021
GeneID:101262304	45.4925	-5.75766	0.000152805	0.0123786	101262304	calreticulin-3-like	0,0187744481988169	9	219	1.46932	Nucleoplasm	101253727 101267666 101259099 101259036 101247238 101259273 101252312 101245795 101257580
GeneID:543805	59.4874	-4.3615	0.000168227	0.0132693	543805		0,0194511601203119	15	522	1.0274	Membrane-enclosed lumen	101253727 101262055 101267666 101259099 101252070 101259036 101268768 101257580 101247238 101259273 101252312 101256806 101245795 101265365 101251323
GeneID:101244651	23.0608	-5.38107	0.000172654	0.0133836	101244651	PRA1 family protein F3	0,0194511601203119	15	522	1.0274	Organelle lumen	101253727 101262055 101267666 101259099 101252070 101259036 101268768 101257580 101247238 101259273 101252312 101256806 101245795 101265365 101251323
GeneID:101267347	26.6412	-5.00977	0.000172508	0.0133836	101267347	A20/AN1 zinc finger protein SAP4	0,0194511601203119	15	522	1.0274	Intracellular organelle lumen	101253727 101262055 101267666 101259099 101252070 101259036 101268768 101257580 101247238 101259273 101252312 101256806 101245795 101265365 101251323
GeneID:101263711	25.947	-5.54198	0.000175564	0.0134929	101263711	probable 6-phosphogluconolactonase 4, chloroplastic	0,0213107649990008	7	147	1.70255	Large ribosomal subunit	778284 101259713 101254152 101267290 101253271 101268580 101259021
GeneID:101254996	18.4719	-5.98753	0.000179948	0.0136749	101254996	uncharacterized protein LOC101254996	0,0213107649990008	13	425	1.09364	Nuclear lumen	101253727 101262055 101267666 101259099 101259036 101268768 101257580 101247238 101259273 101252312 101256806 101245795 101265365
GeneID:101251542	26.012	-5.54126	0.000180973	0.0136749	101251542	uncharacterized protein LOC101251542	0,0227541875953443	9	236	1.36348	Ribosomal subunit	778284 101259713 101254152 101267290 101253271 101248302 101268580 101259021 101252719
GeneID:101248885	46.4945	-4.85621	0.000183743	0.0137685	101248885	hypersensitive-induced reaction 1 protein	0,0297283590890752	10	295	1.21198	Endoplasmic reticulum	101253341 101255347 101264006 101248833 101266615 101260078 101267983 101262304 101268572 101262822
GeneID:101245240	49.0054	-5.18771	0.00018777	0.013954	101245240	protein PHLOEM PROTEIN 2-LIKE A8	0,0331277133227998	9	253	1.27186	Vacuole	101268431 101247980 101255908 101265910 101250978 101268572 101262822 101264734 101248490
GeneID:101266189	37.2878	-4.78388	0.000190949	0.0139595	101266189	F-box protein At2g27310	0,0359060685737482	4	54	2.6484	Cell cortex	101258583 543830 101260888 101261607
GeneID:543819	44.9372	-4.58736	0.000189811	0.0139595	543819	phospholipase PLDa1 isoform X1
GeneID:101268159	18.8755	-6.02159	0.000194848	0.0139699	101268159	transcription elongation factor 1 homolog
GeneID:101262833	21.1768	-5.26246	0.000195753	0.0139699	101262833	probable protein phosphatase 2C 6 isoform X1	BIOLOGICAL PROCESS for up-regulated DEGs (adj-p < 0.1 and log2FC > 1)
GeneID:101264892	17.5444	-5.92093	0.000202244	0.0142076	101264892	heterogeneous nuclear ribonucleoprotein 1-like	Enrichment FDR	Genes in list	Total genes	Fold enrichment	Functional Category	Genes
GeneID:101245151	30.6223	-5.21383	0.000201066	0.0142076	101245151	uncharacterized protein LOC101245151	0.0333036	18	3500	0.844974	Organic cyclic compound metabolic process	544238 101263646 101255847 778202 100147714 101259745 101268581 101257282 101262835 101250159 101268533 101244699 543548 543977 101250158 101267522 101259349 101265940
GeneID:101268268	28.8686	-4.71834	0.000206858	0.0144191	101268268	protein NBR1 homolog	0.0212866	22	4276	0.845326	Organonitrogen compound metabolic process	544238 778202 101249800 100529135 101256378 101262835 101246083 101268533 101263886 543548 543977 101246403 101263332 101257282 101259349 101255014 101249390 101255019 101264078 543589 101260603 101267686
GeneID:101243704	24.6249	-4.89175	0.000212191	0.0146771	101243704	probable ubiquitin-conjugating enzyme E2 16	0.0244603	18	3229	0.91589	Biological regulation	101261066 100529135 100147714 101256378 101265339 101257282 101255019 101246083 101261857 101263193 101263886 101244699 100301924 101268560 101259349 101265940 101255014 543589
GeneID:101262560	19.4171	-6.04397	0.000216341	0.0148499	101262560	inactive protein RESTRICTED TEV MOVEMENT 1	0.0212866	15	2184	1.12844	Response to stimulus	100736482 101253577 100529135 101268581 101257282 101255019 101261857 101263193 101263886 100301924 101268560 100147714 101259349 101247557 543589
GeneID:101264357	17.6692	-5.91733	0.000224917	0.0151404	101264357	uncharacterized protein LOC101264357	0.0487586	10	1427	1.15137	Phosphorylation	101246905 100529135 101262835 101262441 101263886 101263332 101259349 101255019 543589 101267686
GeneID:101245147	23.1448	-5.38086	0.000225766	0.0151404	101245147	UDP-glycosyltransferase 91A1	0.0286832	8	812	1.61872	Cell communication	100529135 101255019 101261857 101263193 101263886 100301924 101259349 543589
GeneID:101265790	62.764	-4.09652	0.00023074	0.0151446	101265790	uncharacterized protein ycf45	0.00215704	13	1184	1.80398	Cellular response to stimulus	101253577 100529135 101268581 101257282 101255019 101261857 101263193 101263886 100301924 101268560 100147714 101259349 543589
GeneID:778249	39.0828	-5.41527	0.00023798	0.0152851	778249	CONSTANS interacting protein 2b isoform X2	0.0212866	8	721	1.82303	Signaling	100529135 101255019 101261857 101263193 101263886 100301924 101259349 543589
GeneID:101254022	31.958	-4.559	0.000235891	0.0152851	101254022	uncharacterized protein LOC101254022	0.0212866	8	717	1.8332	Signal transduction	100529135 101255019 101261857 101263193 101263886 100301924 101259349 543589
GeneID:101260523	56.3208	-4.28187	0.00023655	0.0152851	101260523	uncharacterized protein LOC101260523	0.0212866	6	379	2.60106	Cellular response to chemical stimulus	101253577 100529135 101263193 100301924 101268560 543589
GeneID:101245664	25.4487	-4.9482	0.000243078	0.0154286	101245664	stearoyl-acyl-carrier-protein	0.0212866	6	333	2.96037	Intracellular signal transduction	100529135 101255019 101261857 101263886 101259349 543589
GeneID:101257961	24.1582	-4.86501	0.000245362	0.0154286	101257961	multicopper oxidase LPR2	0.0333036	4	183	3.59127	Regulation of response to stimulus	101257282 101263193 100301924 543589
GeneID:101247980	42.9855	-4.73517	0.00025365	0.0157651	101247980	low-temperature-induced cysteine proteinase-like	0.0333036	3	88	5.60116	Regulation of cell communication	101263193 100301924 543589
GeneID:101256935	29.0358	-4.71893	0.000258517	0.0159218	101256935	probable LRR receptor-like serine/threonine-protein kinase At5g10290 isoform X3	0.0333036	3	87	5.66554	Regulation of signal transduction	101263193 100301924 543589
GeneID:101254223	37.3181	-4.52824	0.000261982	0.0160255	101254223	probable E3 ubiquitin-protein ligase RZFP34	0.0333036	3	87	5.66554	Regulation of signaling	101263193 100301924 543589
GeneID:543727	31.6066	-4.54084	0.0002711	0.0161473	543727	subtilisin-like protease	0.027964	3	69	7.1435	Dicarboxylic acid metabolic process	543548 543977 778202
GeneID:101260164	36.1392	-4.47217	0.000269886	0.0161473	101260164	uncharacterized protein LOC101260164	0.026779	3	66	7.46821	Regulation of hormone levels	101256378 101246083 100301924
GeneID:101248432	81.7812	-3.93338	0.000271157	0.0161473	101248432	uncharacterized protein LOC101248432	0.0333036	2	22	14.9364	Cellular hormone metabolic process	101256378 101246083
GeneID:101247768	31.553	-4.85102	0.000276286	0.0163445	101247768	jacalin-related lectin 3	0.0333036	2	22	14.9364	Dicarboxylic acid biosynthetic process	543548 543977
GeneID:101252465	34.285	-5.35927	0.000279713	0.0164391	101252465	uncharacterized protein LOC101252465	0.0333036	2	20	16.4301	Cytokinin metabolic process	101256378 101246083
GeneID:101266843	18.2155	-5.9558	0.00029471	0.0169874	101266843	small ubiquitin-related modifier 1	0.0244603	2	13	25.277	Chorismate metabolic process	543548 543977
GeneID:101260559	19.0831	-5.10101	0.00030855	0.0176719	101260559	uncharacterized protein LOC101260559	0.0212866	2	11	29.8728	Chorismate biosynthetic process	543548 543977
GeneID:101244780	26.0015	-4.97137	0.000312106	0.0177624	101244780	protein NETWORKED 4B
GeneID:101264764	17.5522	-5.90694	0.000326778	0.0182484	101264764	probable serine/threonine-protein kinase kinX	Total genes	173	28424
GeneID:101267595	16.3161	-5.81553	0.00033071	0.0182484	101267595	small acidic protein 1
GeneID:101268808	31.8353	-5.25502	0.000330792	0.0182484	101268808	protein EXORDIUM-like 2	MOLECULAR FUNCTION for up-regulated DEGs (adj-p < 0.1 and log2FC > 1)
GeneID:101265430	20.4568	-6.09131	0.000335926	0.0184166	101265430	protein early flowering 2-like	Enrichment FDR	Genes in list	Total genes	Fold enrichment	Functional Category	Genes
GeneID:101254575	22.4227	-4.76682	0.000340576	0.0184485	101254575	splicing factor SF3a60 homolog	0.0477659	16	3286	0.800003	Small molecule binding	778202 543548 544238 100736482 100301924 101246905 100529135 101263332 101262835 101255019 101268797 101261857 543589 101250771 101267686 101263886
GeneID:101267838	19.06	-6.01633	0.000350772	0.0187747	101267838	uncharacterized protein LOC101267838 isoform X1	0.0477659	15	3037	0.811494	Nucleotide binding	778202 543548 544238 100301924 101246905 100529135 101263332 101262835 101255019 101268797 101261857 543589 101250771 101267686 101263886
GeneID:101261931	26.0505	-5.51721	0.000357057	0.018998	101261931	uncharacterized protein LOC101261931	0.0477659	15	3037	0.811494	Nucleoside phosphate binding	778202 543548 544238 100301924 101246905 100529135 101263332 101262835 101255019 101268797 101261857 543589 101250771 101267686 101263886
GeneID:101256955	26.6736	-4.61212	0.000370509	0.0195978	101256955	40S ribosomal protein S12	0.0477659	13	2450	0.871799	Purine ribonucleoside triphosphate binding	544238 100301924 101246905 100529135 101263332 101262835 101255019 101268797 101261857 543589 101250771 101267686 101263886
GeneID:101267475	28.8417	-4.70835	0.000379265	0.0195997	101267475	NAC domain-containing protein 2-like	0.0477659	18	3298	0.896728	Transferase activity	543977 101246905 100529135 101262835 101255019 101251216 101263886 101250158 101259745 101256387 101263332 101259349 101255745 101264078 543589 101260603 101267686 101263085
GeneID:101260171	38.8263	-4.17197	0.000375293	0.0195997	101260171	RING-H2 finger protein ATL2	0.0477659	9	1363	1.08489	Kinase activity	101246905 100529135 101262835 101255019 101263886 101263332 101259349 543589 101267686
GeneID:101245886	42.6645	-4.97845	0.000383638	0.0197124	101245886	protein ECERIFERUM 26-like	0.0477659	9	1292	1.14451	Phosphotransferase activity, alcohol group as acceptor	101246905 100529135 101262835 101255019 101263886 101263332 101259349 543589 101267686
GeneID:101260554	16.5357	-5.82788	0.000387156	0.0197802	101260554	21.7 kDa class VI heat shock protein	0.0477659	12	1559	1.26466	Transferase activity, transferring phosphorus-containing groups	101246905 100529135 101262835 101255019 101263886 101250158 101259745 101263332 101259349 101255745 543589 101267686
GeneID:101268529	15.6035	-5.74309	0.00039342	0.0198172	101268529	ethylene-responsive transcription factor RAP2-10	0.0477659	5	460	1.78588	Protein serine/threonine kinase activity	100529135 101262835 101255019 101263886 101267686
GeneID:101261613	37.5026	-4.80008	0.000395612	0.0198172	101261613	UDP-rhamnose/UDP-galactose transporter 4	0.0477659	2	33	9.95761	Hydrolase activity, hydrolyzing N-glycosyl compounds	101257282 101246083
GeneID:101265453	30.9914	-4.51508	0.000396696	0.0198172	101265453	ethylene-responsive transcription factor 3	0.0477659	2	27	12.1704	Protein histidine kinase activity	101259349 543589
GeneID:101266168	38.5634	-4.16571	0.000415152	0.0205113	101266168	vacuolar-sorting receptor 3	0.0477659	2	27	12.1704	Phosphotransferase activity, nitrogenous group as acceptor	101259349 543589
GeneID:101259198	209.104	-3.18248	0.000413733	0.0205113	101259198	dormancy-associated protein homolog 3	0.0477659	2	27	12.1704	Actin filament binding	101261066 101250382
GeneID:101251472	18.7694	-5.0607	0.000425109	0.0207748	101251472	uncharacterized protein At4g28440	0.0477659	2	26	12.6385	Phosphorelay sensor kinase activity	101259349 543589
GeneID:101248385	25.842	-4.55607	0.000422814	0.0207748	101248385	ABC1-like kinase 3	0.0477659	2	26	12.6385	Small molecule sensor activity	101259349 543589
GeneID:101246245	21.2312	-4.68874	0.0004415	0.0211666	101246245	LEAF RUST 10 DISEASE-RESISTANCE LOCUS RECEPTOR-LIKE PROTEIN KINASE-like 1.1 isoform X2	0.0477659	1	2	82.1503	3-phosphoshikimate 1-carboxyvinyltransferase activity	543977
GeneID:101244151	22.6067	-4.77002	0.000445208	0.0211816	101244151	urease accessory protein G-like isoform X1	0.0477659	1	2	82.1503	5-methyltetrahydropteroyltriglutamate-homocysteine S-methyltransferase activity	101264078
GeneID:101264624	15.38	-5.70566	0.000451953	0.0212513	101264624	protein PLASTID REDOX INSENSITIVE 2, chloroplastic	0.0477659	1	2	82.1503	Proline dehydrogenase activity	778202
GeneID:101265836	28.6367	-4.70417	0.000454204	0.0212513	101265836	uncharacterized protein LOC101265836	0.0477659	1	2	82.1503	Mechanosensitive ion channel activity	101251284
GeneID:101262669	114.535	-3.94824	0.00045414	0.0212513	101262669	kirola	0.0477659	1	2	82.1503	5-methyltetrahydropteroyltri-L-glutamate-dependent methyltransferase activity	101264078
GeneID:101260897	27.6389	-4.33474	0.000460238	0.0213323	101260897	BES1/BZR1 homolog protein 2
GeneID:101257420	17.9001	-5.00156	0.000464428	0.0213379	101257420	U-box domain-containing protein 2 isoform X2
GeneID:101248357	34.3621	-4.40221	0.000467478	0.0213379	101248357	TMV resistance protein N-like	CELLULAR COMPONENT for up-regulated DEGs (adj-p < 0.1 and log2FC > 1)
GeneID:544008	84.8951	-4.16652	0.000465795	0.0213379	544008	lipoxygenase	Enrichment FDR	Genes in list	Total genes	Fold Enrichment	Functional Category	Genes
GeneID:101266305	15.9977	-5.7531	0.000473769	0.0215158	101266305	F-box protein At4g00755	1,00106971629844e-05	28	4064	1.13199	Cytoplasm	101261066 544238 778202 101253577 101246905 100529135 101265339 101257282 101262835 101262441 101255019 101246083 101257613 101268533 101250382 101248809 101252420 543548 543977 101246403 101249800 101268560 100147714 101259745 101249390 101251132 101255745 543589
GeneID:101251394	18.113	-5.92942	0.000484912	0.021646	101251394	cytochrome P450 81D11	0,00520157262706671	6	319	3.09029	Thylakoid	101252420 101246403 101249800 101268560 101259233 101249390
GeneID:543913	50.0665	-4.12181	0.000483977	0.021646	543913	xyloglucan endotransglucosylase-hydrolase XTH5 precursor	0,00520157262706671	22	4040	0.894706	Intrinsic component of membrane	101262863 100301924 101249973 104645726 101268560 101259233 101251284 101267522 101265339 544133 101256387 101266240 101255903 101254824 101268797 101257613 101251132 101255745 543589 101268533 101260603 101250382
GeneID:101268859	59.2134	-3.82743	0.000486265	0.021646	101268859	THO complex subunit 4D-like isoform X1	0,00903025835623382	21	3979	0.86713	Integral component of membrane	100301924 104645726 101268560 101259233 101251284 101267522 101265339 544133 101256387 101266240 101255903 101254824 101268797 101257613 101251132 101255745 101249973 543589 101268533 101260603 101250382
GeneID:101264616	175.83	-3.61294	0.000496458	0.0219909	101264616	kirola	0,013611860074996	9	984	1.50275	Plastid	544238 101252420 543548 543977 101246403 101249800 101268560 101249390 101262441
GeneID:101268702	33.3112	-4.37056	0.000506706	0.0223348	101268702	receptor-like serine/threonine-protein kinase ALE2 isoform X2	0,0164653216007303	7	633	1.81691	Mitochondrion	778202 101262441 101268533 101249800 101268560 101259745 101255745
GeneID:101259884	167.009	-3.82971	0.000510061	0.022373	101259884	pleiotropic drug resistance protein 1	0,0197123409189748	4	207	3.17489	Chloroplast thylakoid	101252420 101249800 101268560 101249390
GeneID:101250571	58.0564	-4.11327	0.000513272	0.0224046	101250571	28 kDa heat- and acid-stable phosphoprotein	0,0197123409189748	4	204	3.22158	Chloroplast stroma	101252420 543548 544238 101246403
GeneID:778273	72.3443	-5.13926	0.00052105	0.0226342	778273	phytophthora-inhibited protease 1	0,0197123409189748	4	207	3.17489	Plastid thylakoid	101252420 101249800 101268560 101249390
GeneID:101251323	16.9841	-4.92647	0.000523815	0.0226449	101251323	peroxiredoxin-2F, mitochondrial isoform X2	0,0197123409189748	4	207	3.17489	Thylakoid membrane	101252420 101249800 101268560 101259233
GeneID:104648402	18.9106	-5.08451	0.000530233	0.0227226	104648402	glycine-rich cell wall structural protein 1-like	0,0198941953819459	4	213	3.08546	Plastid stroma	101252420 543548 544238 101246403
GeneID:101264734	94.4793	-3.58014	0.000530665	0.0227226	101264734	subtilisin-like protease SBT1.4	0,020632529240942	8	956	1.3749	Chloroplast	544238 101252420 543548 543977 101246403 101249800 101268560 101249390
GeneID:101264966	21.0166	-5.20945	0.000550652	0.0232463	101264966	protein MODIFIER OF SNC1 11	0,0291958927213216	4	248	2.65001	Photosynthetic membrane	101252420 101249800 101268560 101259233
GeneID:101255399	49.9681	-4.12187	0.000545887	0.0232463	101255399	caffeoylshikimate esterase	0,0304484924595291	14	2634	0.873276	Nucleus	101252420 100529135 100147714 101259745 101268581 101257282 101259349 101265940 101262835 101255019 101250621 101246083 101244699 544080
GeneID:101263239	157.287	-3.1499	0.000549608	0.0232463	101263239	18.1 kDa class I heat shock protein	0,0393614007604896	1	2	82.1503	EKC/KEOPS complex	101262835
GeneID:101247506	39.0424	-4.60351	0.000560487	0.0235509	101247506	S-adenosylmethionine synthase 2	0,0393614007604896	1	2	82.1503	Polysome	100147714
GeneID:112941581	18.1364	-5.91972	0.000570549	0.0237517	112941581	uncharacterized protein LOC112941581	0,0428898390115524	1	3	54.7669	Transcription export complex	101265940
GeneID:101266314	32.5111	-4.58797	0.000569785	0.0237517	101266314	F-box protein PP2-A13-like	0,0428898390115524	1	3	54.7669	THO complex part of transcription export complex	101265940
GeneID:101251423	23.5366	-5.37003	0.000574696	0.023775	101251423	aquaporin-5 isoform X2	0,0428898390115524	1	3	54.7669	Alpha DNA polymerase:primase complex	101259745
GeneID:101253566	36.3997	-4.08891	0.00058388	0.0239737	101253566	putative NAC domain containing protein NACMTF2	0,0428898390115524	1	3	54.7669	Cytoplasmic stress granule	100147714
GeneID:101261977	27.7933	-4.35825	0.000587911	0.0240295	101261977	UDP-glycosyltransferase 86A1-like	0,0428898390115524	4	319	2.0602	Organelle subcompartment	101252420 101249800 101268560 101249390
GeneID:101260273	27.0255	-4.3103	0.000593425	0.0241451	101260273	NKAP family protein isoform X2	0,0428898390115524	4	304	2.16185	Whole membrane	101246905 101265339 101262441 101255745
GeneID:109119311	13.8854	-5.57925	0.000609743	0.0246974	109119311		0,0433324586857345	1	4	41.0751	Mitochondrial respiratory chain complex III	101262441
GeneID:101253267	26.5903	-4.27851	0.00061634	0.0248191	101253267	uncharacterized protein LOC101253267	0,0433324586857345	3	182	2.70825	Chloroplast thylakoid membrane	101252420 101249800 101268560
GeneID:544084	340.794	-4.01045	0.000618269	0.0248191	544084	peroxidase precursor	0,0433324586857345	6	756	1.30397	Organelle membrane	101246905 101265339 101262441 101268533 101255745 543589
GeneID:101253702	15.0673	-5.68513	0.000622864	0.0248924	101253702	uncharacterized protein LOC101253702	0,0433324586857345	1	4	41.0751	Intrinsic component of mitochondrial outer membrane	101255745
GeneID:101251665	20.0704	-4.60181	0.000636779	0.0249006	101251665	4-coumarate--CoA ligase-like 5	0,0433324586857345	1	4	41.0751	Integral component of mitochondrial outer membrane	101255745
GeneID:101262660	22.8113	-4.37815	0.000626377	0.0249006	101262660	reticulon-like protein B1	0,0433324586857345	3	181	2.72321	Mitochondrial membrane	101262441 101268533 101255745
GeneID:101245335	29.2682	-4.17017	0.000630144	0.0249006	101245335	uncharacterized protein LOC101245335	0,0433324586857345	3	182	2.70825	Plastid thylakoid membrane	101252420 101249800 101268560
GeneID:101259438	34.9133	-4.01537	0.000639683	0.0249006	101259438	uncharacterized protein LOC101259438	0,0479840150211814	3	193	2.55389	Mitochondrial envelope	101262441 101268533 101255745
GeneID:101262710	80.5185	-3.87523	0.000638471	0.0249006	101262710	ubiquitin-conjugating enzyme E2 7
GeneID:543941	817.329	-2.75989	0.000644193	0.024968	543941
GeneID:101247318	41.6981	-4.49414	0.000652326	0.0251124	101247318	ADP-ribosylation factor 2
GeneID:101254722	28.8446	-4.40545	0.000655377	0.0251124	101254722	alpha carbonic anhydrase 1, chloroplastic isoform X1
GeneID:101265245	32.0955	-4.31748	0.000656296	0.0251124	101265245	uncharacterized protein LOC101265245
GeneID:101247586	31.8195	-4.54413	0.000663854	0.0251872	101247586	SNF7 family protein
GeneID:101254698	17.2134	-4.95209	0.000677552	0.0255824	101254698	serine/threonine-protein phosphatase PP1 isozyme 3
GeneID:101264625	40.5122	-4.65834	0.000682204	0.0255824	101264625	AAA-ATPase At3g28580
GeneID:101267666	23.1689	-4.40316	0.000682804	0.0255824	101267666	heterogeneous nuclear ribonucleoprotein A0
GeneID:101244167	13.9654	-5.58241	0.000691779	0.0256325	101244167	glycine-rich cell wall structural protein 2
GeneID:101243655	110.008	-3.41075	0.000690997	0.0256325	101243655	B2 protein isoform X1
GeneID:101259182	836.82	-3.37789	0.00069775	0.0257138	101259182	uncharacterized protein LOC101259182
GeneID:101251944	19.5145	-5.11465	0.000712094	0.0258875	101251944	splicing factor U2af large subunit A isoform X1
GeneID:101265439	16.8077	-4.92193	0.000712629	0.0258875	101265439	uncharacterized protein LOC101265439 isoform X1
GeneID:101246662	31.7334	-4.07321	0.000716858	0.0258875	101246662	UDP-glucuronic acid decarboxylase 2
GeneID:101257580	50.9845	-4.03631	0.000716351	0.0258875	101257580	pescadillo homolog
GeneID:101248267	16.82	-4.92286	0.000730244	0.0262654	101248267	translocation protein SEC62 isoform X1
GeneID:101252509	27.0526	-4.32078	0.000745999	0.0266191	101252509	LOW QUALITY PROTEIN
GeneID:101247120	18.475	-5.04244	0.000765778	0.0272169	101247120	uncharacterized protein LOC101247120
GeneID:101254425	17.225	-5.84285	0.000782416	0.0275937	101254425	aspartyl protease family protein 2
GeneID:101254900	48.1902	-3.94011	0.000782518	0.0275937	101254900	protein SELF PRUNING 5G
GeneID:101246478	36.4696	-4.51026	0.000798676	0.0280535	101246478	cyclic nucleotide-gated ion channel 4-like
GeneID:101249338	12.896	-5.46682	0.000832125	0.028323	101249338	soluble inorganic pyrophosphatase PPA1
GeneID:101249062	18.7333	-5.05988	0.000834361	0.028323	101249062	probable E3 ubiquitin-protein ligase RNF217
GeneID:101255748	20.2255	-4.60929	0.000826433	0.028323	101255748	protein GPR107-like
GeneID:101249623	18.3025	-4.46469	0.000832413	0.028323	101249623	protein phosphatase 2C family protein isoform X1
GeneID:101267098	25.7497	-4.24139	0.000834697	0.028323	101267098	glutathione peroxidase
GeneID:101264710	16.642	-4.89362	0.00085147	0.0283832	101264710	DNA-directed RNA polymerase V subunit 7
GeneID:101265231	55.5775	-4.75436	0.000852638	0.0283832	101265231	thaumatin-like protein 1b
GeneID:101264433	25.6912	-4.24003	0.000850457	0.0283832	101264433	serine incorporator 3
GeneID:100736441	158.173	-3.67854	0.000839748	0.0283832	100736441	BURP domain-containing protein precursor
GeneID:101256730	22.1436	-4.34221	0.000861721	0.0284875	101256730	DNA-binding protein S1FA
GeneID:109121167	28.3879	-4.69935	0.000868788	0.0286159	109121167	germin-like protein subfamily 1 member 7
GeneID:101252121	36.2622	-4.50042	0.000908273	0.0298073	101252121	GATA transcription factor 1
GeneID:101262369	30.2885	-4.21822	0.000921148	0.0301199	101262369	altered inheritance of mitochondria protein 32
GeneID:101262634	32.8556	-4.13802	0.00094231	0.0307002	101262634	serine/threonine-protein kinase STY13 isoform X1
GeneID:101244177	83.0491	-4.23595	0.000952045	0.0308843	101244177	receptor-like protein 56 isoform X2
GeneID:101248942	60.8141	-3.56076	0.000954831	0.0308843	101248942	NADH dehydrogenase ubiquinone
GeneID:101266019	566.856	-2.95713	0.000973469	0.0313743	101266019	kirola
GeneID:101261306	18.9261	-4.52297	0.00097881	0.0314338	101261306	chaperone protein dnaJ 49
GeneID:101263157	19.569	-5.11079	0.000990984	0.0317115	101263157	uncharacterized protein LOC101263157 isoform X1
GeneID:101249862	23.1402	-4.07894	0.00101507	0.0321392	101249862	probable serine/threonine-protein kinase At1g54610
GeneID:101250443	27.1631	-4.06784	0.00102139	0.0322258	101250443	protein OBERON 4
GeneID:101250978	12.6528	-5.43346	0.0010436	0.0324973	101250978	protein NUCLEAR FUSION DEFECTIVE 2
GeneID:101259122	12.5834	-5.42061	0.00104251	0.0324973	101259122	phospholipase A1-IIdelta
GeneID:101254097	20.535	-5.16981	0.00104281	0.0324973	101254097	cytochrome b561 and DOMON domain-containing protein At5g47530
GeneID:101267835	27.7643	-4.09924	0.00104445	0.0324973	101267835	uncharacterized protein LOC101267835 isoform X3
GeneID:101253341	15.3176	-4.76116	0.00106989	0.0331541	101253341	protein STRICTOSIDINE SYNTHASE-LIKE 6
GeneID:101255333	111.142	-3.41604	0.00108178	0.0331991	101255333	ubiquitin-like protein 5
GeneID:101259546	33.1721	-5.79906	0.00109187	0.0333949	101259546	heavy metal-associated isoprenylated plant protein 12
GeneID:101259516	18.4412	-5.01621	0.00111304	0.0336719	101259516	phytolongin Phyl2.1
GeneID:101268442	26.6309	-4.82283	0.00110731	0.0336719	101268442	casein kinase 1-like protein HD16 isoform X2
GeneID:101256522	20.5191	-4.21359	0.0011159	0.0336719	101256522	uncharacterized protein LOC101256522 isoform X1
GeneID:101245564	38.9298	-4.03494	0.00111048	0.0336719	101245564	multiprotein bridging factor 1c
GeneID:101254036	15.4045	-5.69214	0.00118522	0.0338779	101254036	cytochrome P450 83B1-like
GeneID:112941539	15.5437	-5.67768	0.00118854	0.0338779	112941539
GeneID:101259793	12.0885	-5.36616	0.00117854	0.0338779	101259793	calmodulin-binding protein 25
GeneID:101259099	18.0046	-4.99413	0.00115052	0.0338779	101259099	SAGA-associated factor 29 homolog A isoform X1
GeneID:101245995	63.2572	-4.95456	0.00113533	0.0338779	101245995	endoglucanase 24-like
GeneID:101257588	16.5754	-4.87441	0.00119055	0.0338779	101257588	pectin acetylesterase 8-like isoform X2
GeneID:101252123	19.893	-4.56828	0.00115648	0.0338779	101252123	ribose-phosphate pyrophosphokinase 4
GeneID:101259234	18.1232	-4.4588	0.00115344	0.0338779	101259234	zeatin O-xylosyltransferase
GeneID:101262822	17.4967	-4.39158	0.00119045	0.0338779	101262822	aldehyde dehydrogenase family 3 member H1
GeneID:101258062	28.2834	-4.37991	0.00115769	0.0338779	101258062	uncharacterized protein LOC101258062
GeneID:101259713	24.6091	-4.18232	0.00116747	0.0338779	101259713	60S ribosomal protein L11-1
GeneID:101261260	41.3419	-4.13639	0.00118543	0.0338779	101261260	lignin-forming anionic peroxidase
GeneID:101248673	29.0421	-3.93441	0.00113121	0.0338779	101248673	uncharacterized protein LOC101248673
GeneID:101263228	45.9481	-3.75136	0.00116939	0.0338779	101263228	uncharacterized protein LOC101263228 isoform X1
GeneID:101263533	57.3693	-3.62482	0.00117976	0.0338779	101263533	sodium/calcium exchanger NCL
GeneID:101248835	63.8576	-3.57809	0.00118844	0.0338779	101248835	protein trichome birefringence-like 38
GeneID:101251485	125.107	-3.34657	0.00119643	0.0339378	101251485	small nuclear ribonucleoprotein SmD1b
GeneID:101266652	20.838	-4.65459	0.00120056	0.0339478	101266652	GDSL esterase/lipase At2g04570
GeneID:101267254	16.5707	-5.77472	0.00120957	0.0340953	101267254	cytoplasmic 60S subunit biogenesis factor REI1 homolog 1
GeneID:101262163	81.7006	-3.36712	0.00121338	0.034096	101262163	actin-51
GeneID:101261532	18.3746	-5.00528	0.00125785	0.0347181	101261532	protein RTF2 homolog
GeneID:101263346	15.7396	-4.79319	0.00125665	0.0347181	101263346	dolichyl-diphosphooligosaccharide--protein glycosyltransferase subunit 4A
GeneID:101253799	15.6344	-4.7809	0.00125003	0.0347181	101253799	ataxin-7-like protein 3
GeneID:101245411	20.4063	-4.21351	0.00124976	0.0347181	101245411	G-type lectin S-receptor-like serine/threonine-protein kinase At4g27290
GeneID:101245224	145.307	-3.23351	0.00125868	0.0347181	101245224	uncharacterized protein At2g23090
GeneID:543668	138.395	-3.08036	0.00125687	0.0347181	543668	eukaryotic translation initiation factor 5A-2
GeneID:101256572	13.0949	-5.46373	0.00127859	0.0349456	101256572	LOW QUALITY PROTEIN
GeneID:101263621	13.5488	-5.49483	0.00129313	0.0352131	101263621
GeneID:543917	17.8152	-4.43123	0.00130013	0.0352131	543917	NAC domain protein
GeneID:101257896	17.5014	-4.94725	0.00131465	0.0353931	101257896	subtilisin-like protease 4B
GeneID:101267983	18.1764	-4.44123	0.00132327	0.03551	101267983	uncharacterized protein LOC101267983
GeneID:101247665	17.4256	-4.39266	0.00134308	0.0357307	101247665	probable histone H2A.1
GeneID:778312	35.643	-3.88833	0.0013426	0.0357307	778312	sorbitol related enzyme
GeneID:101250760	17.0402	-5.80047	0.00137092	0.0359985	101250760	rust resistance kinase Lr10
GeneID:101253552	12.9143	-5.43298	0.00136021	0.0359985	101253552	early nodulin-like protein 1
GeneID:101255109	27.4356	-4.64412	0.00137316	0.0359985	101255109	protein EMBRYO DEFECTIVE 514
GeneID:101264626	24.6771	-4.49971	0.00136384	0.0359985	101264626	AP-1 complex subunit mu-2
GeneID:101247705	11.8295	-5.32385	0.00138744	0.0361619	101247705	RING-H2 finger protein ATL54
GeneID:101266358	16.9908	-4.35712	0.00138547	0.0361619	101266358	UDP-glucuronate 4-epimerase 5
GeneID:101251554	14.9539	-4.74077	0.00139961	0.0363738	101251554	tubby-like F-box protein 5
GeneID:101259837	17.9308	-4.44215	0.00142389	0.0363738	101259837	GATA transcription factor 24-like isoform X1
GeneID:101259992	27.0905	-3.83215	0.00142058	0.0363738	101259992	CBL-interacting serine/threonine-protein kinase 23
GeneID:101266025	96.2496	-3.70526	0.00141924	0.0363738	101266025	gibberellin-regulated family protein precursor
GeneID:544149	123.123	-3.4112	0.00141514	0.0363738	544149	acidic 26 kDa endochitinase precursor
GeneID:101249537	15.786	-4.81663	0.00144908	0.0369124	101249537	cytosolic Fe-S cluster assembly factor NBP35
GeneID:112941117	14.1284	-4.64032	0.00145364	0.0369242	112941117	uncharacterized protein LOC112941117 isoform X2
GeneID:101260180	15.2817	-4.73984	0.00146402	0.0370026	101260180	uncharacterized protein LOC101260180
GeneID:101265167	35.575	-3.73769	0.00146496	0.0370026	101265167	uncharacterized protein LOC101265167
GeneID:101255136	33.4035	-3.79307	0.00147376	0.0371207	101255136	1,2-dihydroxy-3-keto-5-methylthiopentene dioxygenase 1 isoform 1
GeneID:101250009	20.1615	-4.59911	0.00148101	0.037199	101250009	1-aminocyclopropane-1-carboxylate oxidase homolog 1
GeneID:101258773	61.3913	-3.52132	0.0015121	0.0376643	101258773	5-amino-6-(5-phospho-D-ribitylamino)uracil phosphatase, chloroplastic
GeneID:101260768	14.3643	-4.6765	0.00154286	0.0383243	101260768	signal peptidase complex subunit 3B
GeneID:101253945	11.7013	-5.3181	0.0015871	0.0393147	101253945	elicitor-responsive protein 1
GeneID:101258865	76.2413	-3.40763	0.00159921	0.0393975	101258865	uncharacterized protein LOC101258865
GeneID:101260888	19.0152	-4.10993	0.00161051	0.0394598	101260888	exocyst complex component EXO70E2
GeneID:101252070	69.0984	-3.29245	0.00160874	0.0394598	101252070	iron-sulfur cluster assembly protein 1
GeneID:101247016	14.2633	-4.66171	0.00162199	0.0396329	101247016	LEAF RUST 10 DISEASE-RESISTANCE LOCUS RECEPTOR-LIKE PROTEIN KINASE-like 1.1 isoform X1
GeneID:101266385	13.2578	-5.45443	0.00164516	0.0397668	101266385	transcription factor VOZ1
GeneID:101258486	32.1961	-4.94735	0.00163875	0.0397668	101258486	glutaredoxin-C13
GeneID:101253061	37.0506	-3.97096	0.0016422	0.0397668	101253061	pectin acetylesterase 9
GeneID:101248542	40.2594	-3.66556	0.00164446	0.0397668	101248542	putative E3 ubiquitin-protein ligase LIN isoform X2
GeneID:101267943	19.833	-5.97629	0.00166032	0.0399188	101267943	NAC domain-containing protein 22
GeneID:101260872	32.3499	-4.32529	0.00165857	0.0399188	101260872	ubiquitin-conjugating enzyme E2 28
GeneID:101253766	11.5422	-5.2884	0.0017168	0.0401604	101253766	aldose 1-epimerase
GeneID:101256908	15.143	-4.74915	0.00169908	0.0401604	101256908	adagio protein 3
GeneID:101257084	13.506	-4.59899	0.00170624	0.0401604	101257084	HD domain-containing protein 2
GeneID:101245672	17.1678	-4.35676	0.00170154	0.0401604	101245672	probable serine/threonine-protein kinase At1g54610
GeneID:101257301	22.7343	-4.3492	0.00171553	0.0401604	101257301	subtilisin-like protease SBT1.9
GeneID:101245861	24.5858	-3.92269	0.00168182	0.0401604	101245861	tubby-like F-box protein 7
GeneID:101247702	38.9754	-3.89803	0.00171442	0.0401604	101247702	serine/arginine-rich splicing factor SR34A
GeneID:112940425	55.4503	-3.50825	0.00171038	0.0401604	112940425
GeneID:101266505	51.9387	-3.47865	0.00171317	0.0401604	101266505	ubiquitin-conjugating enzyme E2 variant 1B-like
GeneID:544054	111.893	-3.16946	0.0017195	0.0401604	544054	superoxide dismutase Cu-Zn
GeneID:543806	28.0347	-3.89562	0.00173241	0.040357	543806
GeneID:101252130	13.3193	-4.5717	0.0017428	0.0404943	101252130
GeneID:101253855	12.0747	-5.33606	0.00178133	0.0409661	101253855	cationic amino acid transporter 5
GeneID:101244459	12.9985	-4.54356	0.00178114	0.0409661	101244459
GeneID:101255316	24.243	-4.45204	0.00176921	0.0409661	101255316	receptor-like protein 13 isoform X2
GeneID:101260137	23.8431	-4.45167	0.00177576	0.0409661	101260137	probable ribose-5-phosphate isomerase 2
GeneID:101268572	68.3638	-3.27744	0.00178619	0.040973	101268572	REF/SRPP-like protein At1g67360
GeneID:101266670	28.68	-3.9248	0.00182669	0.041576	101266670	serine/threonine receptor-like kinase NFP
GeneID:101265780	242.364	-3.00029	0.00183097	0.041576	101265780	glycine-rich RNA-binding protein-like
GeneID:100736470	18.7789	-4.09769	0.00185367	0.0419855	100736470	autophagy 8h
GeneID:543567	18.2989	-4.05562	0.00186401	0.042008	543567
GeneID:101251456	56.0262	-3.70278	0.00185984	0.042008	101251456	probable GTP diphosphokinase RSH2, chloroplastic
GeneID:101258781	16.7919	-4.88731	0.00188257	0.0423201	101258781	zinc finger protein CONSTANS-LIKE 13
GeneID:101260346	15.0018	-4.73991	0.00188749	0.0423249	101260346	ferritin-2, chloroplastic
GeneID:101264106	13.7393	-4.61332	0.00190647	0.0425384	101264106	ADP-ribosylation factor 1-like 2
GeneID:101247256	19.2284	-4.13576	0.00190484	0.0425384	101247256	serine/arginine-rich-splicing factor SR34
GeneID:101256329	11.7069	-5.30246	0.00191929	0.0426609	101256329	protein FANTASTIC FOUR 3
GeneID:101250783	13.0606	-4.54921	0.00192283	0.0426609	101250783	nitrate regulatory gene2 protein
GeneID:101260275	16.4137	-4.3025	0.00192619	0.0426609	101260275	COX assembly mitochondrial protein 2 homolog isoform X1
GeneID:101248052	54.6585	-3.33609	0.00193113	0.0426653	101248052	glutathione S-transferase zeta class isoform X1
GeneID:101244911	13.8369	-4.63286	0.00194479	0.0428616	101244911	dynamin-related protein 1E
GeneID:101247280	16.3954	-4.2898	0.00196945	0.0431935	101247280	bifunctional nuclease 2
GeneID:101249556	20.0973	-4.20074	0.00196796	0.0431935	101249556	autophagy-related protein 3
GeneID:101246033	15.7416	-4.24764	0.00198168	0.0432506	101246033	syntaxin-61
GeneID:101266253	29.8016	-4.00011	0.00200883	0.043737	101266253	PRA1 family protein B4
GeneID:100134902	54.65	-3.3369	0.00203451	0.0441891	100134902	phenylacetaldehyde reductase
GeneID:101256710	21.207	-3.95615	0.00204379	0.0442837	101256710	enoyl-CoA delta isomerase 1, peroxisomal
GeneID:101265932	28.9877	-3.76274	0.00206565	0.0446497	101265932	wound-induced protein 1
GeneID:101255117	55.8303	-3.47205	0.00207293	0.0446998	101255117	uncharacterized protein LOC101255117
GeneID:101245401	17.7944	-4.01557	0.00212021	0.0455009	101245401	probable transcription factor At5g28040
GeneID:101246693	13.1067	-4.54784	0.00213386	0.0456507	101246693	WD repeat-containing protein
GeneID:101266759	21.2136	-4.27938	0.00213734	0.0456507	101266759	uncharacterized protein LOC101266759
GeneID:543870	14.5133	-4.68761	0.00215436	0.0459053	543870	SNF1-related protein kinase
GeneID:101261424	27.7148	-3.87301	0.0021698	0.0460261	101261424	probably inactive leucine-rich repeat receptor-like protein kinase At5g48380
GeneID:101260417	61.8453	-3.40878	0.00217539	0.0460261	101260417	uncharacterized protein LOC101260417
GeneID:101246246	10.5374	-5.1681	0.00219775	0.0461725	101246246	chaperone protein dnaJ 49
GeneID:101260755	10.4683	-5.13803	0.00218926	0.0461725	101260755	DNA topoisomerase 6 subunit A
GeneID:101264038	12.6485	-4.50069	0.00220285	0.0461725	101264038	protein KINESIN LIGHT CHAIN-RELATED 1-like
GeneID:101247342	20.4017	-3.90233	0.00219281	0.0461725	101247342	protein MARD1
GeneID:101246261	12.732	-5.38569	0.00226013	0.0470443	101246261	uncharacterized protein LOC101246261
GeneID:101250889	13.9212	-4.60515	0.00225503	0.0470443	101250889	oxysterol-binding protein-related protein 1D
GeneID:101250813	36.9767	-3.68523	0.00227822	0.0473112	101250813	3-isopropylmalate dehydratase small subunit 3
GeneID:101247229	13.711	-4.61473	0.00228714	0.0473869	101247229	coatomer subunit beta'-2
GeneID:101260873	9.79436	-5.06015	0.00231178	0.0477156	101260873	protein LIGHT-DEPENDENT SHORT HYPOCOTYLS 10-like
GeneID:101247018	31.5486	-4.08248	0.00231423	0.0477156	101247018	protein-tyrosine-phosphatase MKP1-like
GeneID:101263977	30.1763	-3.81286	0.00231892	0.0477156	101263977	ankyrin repeat-containing protein At5g02620-like
GeneID:101257131	106.873	-3.25372	0.00233366	0.0479092	101257131	HMG1/2-like protein
GeneID:543591	23.5474	-3.86068	0.00234438	0.0480198	543591
GeneID:101248560	29.7421	-3.78822	0.00235645	0.0480476	101248560	jacalin-related lectin 19
GeneID:101268306	33.9	-3.53686	0.00236136	0.0480476	101268306	receptor-like protein Cf-9
GeneID:101261075	22.3964	-4.04883	0.00238175	0.0481535	101261075	phosphatidylinositol/phosphatidylcholine transfer protein SFH6 isoform X2
GeneID:101244994	17.7072	-4.00999	0.00238304	0.0481535	101244994	vesicle-associated protein 1-1
GeneID:101246490	30.7414	-3.66821	0.00237557	0.0481535	101246490	SUPPRESSOR OF K(+) TRANSPORT GROWTH DEFECT 1-like protein
GeneID:101251157	23.2268	-3.83595	0.00243917	0.0490671	101251157	serine/threonine-protein kinase STN7, chloroplastic
GeneID:101055587	55.4142	-3.36547	0.00244966	0.0491681	101055587	golden1-like protein
GeneID:101258804	44.4542	-3.73871	0.00251803	0.0504278	101258804	14 kDa zinc-binding protein
GeneID:101267466	14.8695	-4.16378	0.00252636	0.0504822	101267466
GeneID:101247974	27.1013	-3.84305	0.00256667	0.0511741	101247974	digalactosyldiacylglycerol synthase 1, chloroplastic-like
GeneID:100191137	213.666	-2.78586	0.00258569	0.0514393	100191137	CONSTANS-like protein
GeneID:544131	267.598	-3.07924	0.00261131	0.0517201	544131	calmodulin 2
GeneID:101254668	13.284	-5.42664	0.00263872	0.0517227	101254668	cytochrome P450 CYP736A12-like
GeneID:101253750	11.0792	-5.22193	0.00261871	0.0517227	101253750	NEP1-interacting protein-like 1
GeneID:101254356	9.49663	-5.00714	0.00265342	0.0517227	101254356	protein PHLOEM PROTEIN 2-LIKE A1
GeneID:101256475	15.3196	-4.75578	0.0026428	0.0517227	101256475	uncharacterized protein LOC101256475
GeneID:101261461	13.3048	-4.55588	0.00263034	0.0517227	101261461	AAA-ATPase At3g50940-like
GeneID:101247122	12.8957	-4.52886	0.00266321	0.0517227	101247122	nuclear transcription factor Y subunit C-1 isoform X1
GeneID:101248153	19.5637	-4.13867	0.00263518	0.0517227	101248153	ferrochelatase-2, chloroplastic isoform X1
GeneID:101245655	21.1576	-3.96164	0.00265564	0.0517227	101245655	putative casein kinase II subunit beta-4 isoform X2
GeneID:101255336	27.6228	-3.6824	0.00265823	0.0517227	101255336	auxin response factor 18
GeneID:543575	10.5845	-5.15609	0.00267791	0.051896	543575
GeneID:101250165	14.2139	-4.65661	0.00268432	0.0519085	101250165	actin
GeneID:101265910	14.9857	-4.16066	0.0027308	0.0524687	101265910	probable aspartyl aminopeptidase
GeneID:101268068	31.1558	-3.70049	0.00272837	0.0524687	101268068	uncharacterized protein LOC101268068
GeneID:101258765	37.133	-3.43838	0.0027233	0.0524687	101258765	uncharacterized protein LOC101258765
GeneID:101258664	10.7814	-5.16706	0.00274839	0.0526941	101258664	probable CCR4-associated factor 1 homolog 6
GeneID:101252712	13.7166	-5.49728	0.00276435	0.0528874	101252712	uncharacterized acetyltransferase At3g50280
GeneID:101263679	26.2068	-5.44626	0.00280835	0.052944	101263679	linamarin synthase 1-like
GeneID:100529102	13.2787	-4.54727	0.00280853	0.052944	100529102	beta-amyrin synthase
GeneID:101264946	12.4526	-4.44631	0.00280248	0.052944	101264946
GeneID:101265975	17.2085	-3.95303	0.00278538	0.052944	101265975	zinc finger protein GIS
GeneID:101251684	111.695	-3.00097	0.00279572	0.052944	101251684	glutaredoxin-C13
GeneID:101245031	21.5647	-3.99623	0.00284654	0.0534364	101245031	nucleosome assembly protein 1;2 isoform X2
GeneID:778318	12.5148	-4.48137	0.00293435	0.0548949	778318	uncharacterized protein LOC778318 precursor
GeneID:101259385	16.8994	-3.93722	0.00293644	0.0548949	101259385	UBP1-associated protein 2A-like
GeneID:101247578	33.6205	-3.67023	0.00295489	0.0550111	101247578	copper transport protein ATX1 isoform X1
GeneID:101243963	27.0105	-3.65801	0.00295143	0.0550111	101243963	heat stress transcription factor B-2a
GeneID:101256326	14.3454	-4.11298	0.0030268	0.0550951	101256326	cyclin-P3-1
GeneID:101245797	18.6207	-4.09193	0.00301253	0.0550951	101245797	protein ABIL1
GeneID:101257689	21.6495	-3.98935	0.00301106	0.0550951	101257689	ankyrin repeat-containing protein NPR4-like
GeneID:101247719	17.6545	-3.98849	0.00299289	0.0550951	101247719	histidine kinase 3
GeneID:101256958	22.9238	-3.82602	0.00302295	0.0550951	101256958	protein SAWADEE HOMEODOMAIN HOMOLOG 1
GeneID:101259813	36.6267	-3.68132	0.0030193	0.0550951	101259813	uncharacterized protein LOC101259813
GeneID:101262648	67.9079	-3.33718	0.00302286	0.0550951	101262648	heavy metal-associated isoprenylated plant protein 5
GeneID:778281	69.8948	-3.29604	0.00298871	0.0550951	778281
GeneID:101254478	19.9847	-4.57963	0.00306935	0.0556446	101254478	probable adenylate kinase 6, chloroplastic
GeneID:101255960	31.8595	-3.59506	0.00306936	0.0556446	101255960	uncharacterized protein LOC101255960
GeneID:101262858	13.4051	-4.55887	0.00309176	0.0559379	101262858	3-ketoacyl-CoA synthase 20-like
GeneID:544136	55.322	-3.53378	0.00310027	0.0559793	544136
GeneID:101261451	19.4353	-4.14302	0.00311263	0.0560374	101261451	endo-1,3;1,4-beta-D-glucanase-like
GeneID:104648156	17.3001	-4.89569	0.00322514	0.0568888	104648156	cucumber peeling cupredoxin
GeneID:101261634	15.7933	-4.75984	0.00319606	0.0568888	101261634	G-type lectin S-receptor-like serine/threonine-protein kinase SD2-5
GeneID:101256451	18.5209	-4.08189	0.00320671	0.0568888	101256451	mannose-6-phosphate isomerase 1-like
GeneID:101255351	18.2873	-4.05775	0.00323289	0.0568888	101255351	protein C2-DOMAIN ABA-RELATED 3
GeneID:101253040	22.5884	-4.05535	0.00321269	0.0568888	101253040	probable protein phosphatase 2C 78
GeneID:101261656	74.7269	-3.89864	0.00322905	0.0568888	101261656	glycine-rich protein A3
GeneID:101268815	16.3513	-3.89845	0.003207	0.0568888	101268815	sm-like protein LSM36B
GeneID:101254975	28.2545	-3.55785	0.00326615	0.0573618	101254975	polyadenylate-binding protein RBP45
GeneID:101262772	38.6764	-3.51784	0.00331396	0.058088	101262772	homeobox-DDT domain protein RLT1
GeneID:101264331	11.9301	-5.2809	0.0033473	0.0581162	101264331	uncharacterized protein LOC101264331
GeneID:101266872	9.0928	-4.93233	0.00332336	0.0581162	101266872	cold-responsive protein kinase 1
GeneID:101262232	13.3561	-4.54264	0.00336081	0.0581162	101262232	homeobox-leucine zipper protein HAT4
GeneID:778317	11.9032	-4.38239	0.0033563	0.0581162	778317	V-type proton ATPase subunit e-like precursor
GeneID:101258933	28.3253	-3.99079	0.00335774	0.0581162	101258933	cytochrome P450 78A5-like
GeneID:101245581	23.1621	-4.10644	0.00337496	0.0581373	101245581	serine/threonine-protein kinase PBL27
GeneID:101256975	40.5234	-3.36558	0.00337457	0.0581373	101256975	universal stress protein PHOS34
GeneID:101247110	60.6588	-3.54715	0.00338913	0.0582382	101247110	phosphomethylethanolamine N-methyltransferase isoform X1
GeneID:543626	20.4806	-3.64638	0.00340091	0.0582495	543626
GeneID:101246135	9.37929	-4.97167	0.00344299	0.058858	101246135	ATP-citrate synthase alpha chain protein 2
GeneID:101264862	10.2233	-5.10915	0.00348092	0.0593124	101264862	annexin D4
GeneID:101267310	12.4992	-4.45095	0.00348276	0.0593124	101267310	uncharacterized protein LOC101267310
GeneID:101261676	23.6906	-3.88061	0.00350753	0.0595926	101261676	protein DA1-related 1
GeneID:101259970	10.1993	-5.06304	0.0035198	0.0596046	101259970	A20/AN1 zinc finger protein
GeneID:101262592	16.8836	-3.9249	0.00352665	0.0596084	101262592	putative dual specificity protein phosphatase DSP8
GeneID:101267506	28.2069	-4.28151	0.00355949	0.0600506	101267506	protein PHYTOCHROME KINASE SUBSTRATE 3
GeneID:778298	2473.06	-2.54411	0.00356981	0.0601118	778298	metallothionein-like protein type 2 B
GeneID:101258746	41.6979	-3.43155	0.00357855	0.0601464	101258746	uncharacterized protein LOC101258746
GeneID:104649423	12.8466	-4.51428	0.00359431	0.0601863	104649423	uncharacterized protein LOC104649423 isoform X1
GeneID:101261128	11.4099	-4.33035	0.00359195	0.0601863	101261128	60S ribosomal protein L28-1
GeneID:543923	13.4632	-4.00858	0.00360694	0.0602855	543923	protein phosphatase 2C
GeneID:109120909	11.4345	-4.34712	0.0036183	0.0603631	109120909	uncharacterized protein LOC109120909
GeneID:101266248	27.6961	-3.70623	0.00362713	0.0603984	101266248	uncharacterized protein LOC101266248
GeneID:101254476	13.9316	-4.6064	0.00365432	0.0605161	101254476
GeneID:101253185	18.5317	-4.0593	0.00365439	0.0605161	101253185	protein FLX-like 3
GeneID:543635	17.3345	-3.95482	0.00366867	0.060641	543635
GeneID:101265598	20.4546	-3.63726	0.00368252	0.0607582	101265598	ABC transporter F family member 4
GeneID:101258649	13.7468	-4.03963	0.00370048	0.0609427	101258649	ribosome maturation protein SBDS
GeneID:109118715	16.7097	-4.84832	0.0037444	0.0613548	109118715
GeneID:101266446	28.0695	-3.5417	0.00374517	0.0613548	101266446	serine/arginine-rich splicing factor RS2Z33 isoform X1
GeneID:544095	137.862	-2.94647	0.00374597	0.0613548	544095
GeneID:101262665	24.8755	-3.52625	0.0037658	0.0614557	101262665	uncharacterized protein LOC101262665 isoform X2
GeneID:101244450	58.5729	-3.09977	0.00376172	0.0614557	101244450	probable esterase KAI2
GeneID:101256176	9.82869	-5.01861	0.00380391	0.0614758	101256176	putative methyltransferase DDB_G0268948
GeneID:101250112	9.08236	-4.93931	0.00382173	0.0614758	101250112	uncharacterized protein LOC101250112
GeneID:101248833	8.95809	-4.89149	0.0038064	0.0614758	101248833	transmembrane emp24 domain-containing protein p24delta3
GeneID:101260815	16.1676	-4.28117	0.00380301	0.0614758	101260815	binding partner of ACD11 1
GeneID:101246670	42.1735	-3.91718	0.00379101	0.0614758	101246670	ABC transporter G family member 11-like
GeneID:101268015	32.2219	-3.46679	0.00377954	0.0614758	101268015	clathrin interactor EPSIN 1
GeneID:101260664	12.2711	-5.33438	0.00389453	0.0616998	101260664	glucan endo-1,3-beta-glucosidase 11-like
GeneID:112941082	10.7226	-5.1374	0.00386605	0.0616998	112941082
GeneID:101253747	12.6315	-4.48757	0.00389191	0.0616998	101253747	exocyst complex component EXO84C
GeneID:543540	11.6222	-4.35067	0.00389202	0.0616998	543540
GeneID:101254501	19.3996	-4.30777	0.00386881	0.0616998	101254501	uncharacterized protein LOC101254501
GeneID:101251138	20.9634	-4.26514	0.00391113	0.0616998	101251138	xyloglucan galactosyltransferase XLT2
GeneID:101265561	15.4673	-4.21861	0.00390571	0.0616998	101265561	universal stress protein PHOS34
GeneID:101250219	44.7476	-4.14452	0.00390866	0.0616998	101250219	cyclic nucleotide-gated ion channel 1 isoform X1
GeneID:101267131	14.4824	-4.11737	0.00387817	0.0616998	101267131	calmodulin-like protein 3
GeneID:101259021	45.3867	-3.6838	0.0038748	0.0616998	101259021	60S ribosomal protein L12
GeneID:101252312	30.064	-3.35669	0.0038922	0.0616998	101252312	uncharacterized protein LOC101252312
GeneID:101259125	89.867	-3.37549	0.00392532	0.0617071	101259125	probable metal-nicotianamine transporter YSL7
GeneID:101255294	13.1022	-3.97784	0.00394221	0.0618646	101255294	quinolinate phoshoribosyltransferase
GeneID:101253674	10.7864	-5.11171	0.00396982	0.0620811	101253674	uncharacterized protein LOC101253674
GeneID:101256981	54.656	-3.10599	0.00396896	0.0620811	101256981	protein NRT1/ PTR FAMILY 5.10 isoform X1
GeneID:101264810	16.1717	-4.80547	0.00409032	0.0637437	101264810	transcription factor MYB86-like isoform X2
GeneID:101254713	27.3399	-4.09257	0.00408456	0.0637437	101254713	14 kDa proline-rich protein DC2.15-like
GeneID:101258982	17.0414	-3.94357	0.00411952	0.0639589	101258982	uncharacterized protein LOC101258982
GeneID:543837	53.1236	-3.65243	0.00411267	0.0639589	543837
GeneID:101251606	77.8015	-3.44469	0.00413173	0.0639589	101251606	B2 protein
GeneID:101256280	11.8128	-5.27846	0.00419046	0.0639649	101256280	cytochrome P450 71A1-like
GeneID:101258307	8.64852	-4.87466	0.00419205	0.0639649	101258307	aspartic proteinase-like protein 2 isoform X1
GeneID:101255941	12.5053	-4.44522	0.00416929	0.0639649	101255941	uncharacterized protein LOC101255941
GeneID:101265522	16.0071	-4.25732	0.00414948	0.0639649	101265522	probable voltage-gated potassium channel subunit beta
GeneID:101245292	21.0327	-3.70218	0.00419699	0.0639649	101245292	non-lysosomal glucosylceramidase isoform X1
GeneID:101266876	22.9103	-3.59885	0.00415928	0.0639649	101266876	BTB/POZ domain-containing protein POB1 isoform X1
GeneID:101243641	25.3228	-3.56472	0.00418412	0.0639649	101243641	acyl-coenzyme A oxidase 3, peroxisomal-like isoform X2
GeneID:101262280	55.11	-3.06265	0.00417885	0.0639649	101262280	pentatricopeptide repeat-containing protein At5g56310-like isoform X1
GeneID:101264008	14.6736	-4.14309	0.0042303	0.0643523	101264008	probable receptor-like protein kinase At5g59700
GeneID:101255255	78.1534	-3.0961	0.00424387	0.0643523	101255255	receptor-like protein kinase FERONIA
GeneID:101257656	20.2026	-3.61931	0.00425293	0.0643645	101257656	uncharacterized protein LOC101257656 isoform X1
GeneID:101256806	13.8045	-4.60019	0.00428744	0.0646598	101256806	probable histone H2AXb
GeneID:101263872	21.5931	-4.29041	0.00429653	0.0646598	101263872	NAC domain-containing protein 90
GeneID:101252005	41.9676	-3.16227	0.00430105	0.0646598	101252005	probable polyamine oxidase 2
GeneID:101266060	40.4428	-3.49219	0.00433805	0.0648291	101266060	A20/AN1 zinc finger protein
GeneID:101267045	39.1968	-3.44318	0.00434021	0.0648291	101267045	cysteine-rich and transmembrane domain-containing protein WIH2
GeneID:101258514	25.9319	-4.24085	0.00435366	0.0648966	101258514	phosphatidylinositol transfer protein 3
GeneID:101254152	142.636	-2.95734	0.00435916	0.0648966	101254152	60S ribosomal protein L34
GeneID:101267374	20.5743	-3.67037	0.00438948	0.0650831	101267374	protein SCAR1 isoform X1
GeneID:101267207	110.136	-2.97608	0.00438687	0.0650831	101267207
GeneID:101265483	9.3828	-4.98049	0.00440332	0.0651227	101265483	protein DETOXIFICATION 18
GeneID:101247277	19.6708	-3.59732	0.00442785	0.0651697	101247277	cysteine desulfurase, mitochondrial
GeneID:101251917	24.6347	-3.52973	0.00442823	0.0651697	101251917	probable serine/threonine-protein kinase PBL11 isoform X2
GeneID:101250100	10.9181	-4.25947	0.00444154	0.0652588	101250100	vacuolar protein sorting-associated protein 20 homolog 2
GeneID:101261344	17.5203	-3.67642	0.00445757	0.0653874	101261344	probable ADP-ribosylation factor GTPase-activating protein AGD9
GeneID:101256736	19.6776	-3.85406	0.00449912	0.0655824	101256736	derlin-2.2
GeneID:101253030	69.1806	-3.19145	0.0044855	0.0655824	101253030	polyol transporter 5-like
GeneID:778320	143.382	-2.91247	0.00449377	0.0655824	778320	uncharacterized protein LOC778320
GeneID:104648221	13.3691	-4.52894	0.00451611	0.0656039	104648221
GeneID:101263916	12.6406	-3.92251	0.00452989	0.065698	101263916	uncharacterized protein LOC101263916
GeneID:101248154	8.97255	-4.87665	0.00454998	0.0657772	101248154	uncharacterized protein
GeneID:101257750	10.6189	-4.2197	0.00454537	0.0657772	101257750	uncharacterized protein LOC101257750
GeneID:101250126	11.3996	-4.34601	0.00456246	0.0658518	101250126	fatty acyl-CoA reductase 3
GeneID:101260377	23.4638	-3.44158	0.00457417	0.0659149	101260377	importin beta-like SAD2
GeneID:101248490	18.7426	-3.75641	0.00460874	0.0663069	101248490	inositol transporter 1
GeneID:101268289	31.7659	-3.59936	0.0046277	0.0664733	101268289	26S proteasome regulatory subunit 6B homolog
GeneID:101255822	8.25084	-4.7925	0.00463572	0.0664823	101255822	glucosamine 6-phosphate N-acetyltransferase
GeneID:101244743	12.9064	-4.51058	0.00468329	0.066951	101244743	probable calcium-binding protein CML13
GeneID:101250247	46.7117	-3.18814	0.00469497	0.0670114	101250247	protein PLANT CADMIUM RESISTANCE 2
GeneID:101248830	10.6323	-4.23362	0.00472653	0.0672483	101248830	putative metallophosphoesterase At3g03305 isoform X1
GeneID:101266771	266.407	-2.82472	0.00472475	0.0672483	101266771	glycine-rich RNA-binding protein
GeneID:101244131	13.7997	-4.05402	0.00475158	0.0674979	101244131	nucleolin
GeneID:101262896	9.92914	-5.03978	0.00478371	0.0678471	101262896	putative E3 ubiquitin-protein ligase SINA-like 6
GeneID:101258516	15.7191	-4.74994	0.00481842	0.0681246	101258516	WUSCHEL-related homeobox 8
GeneID:101250104	56.9207	-3.06415	0.00482694	0.0681379	101250104	aldehyde dehydrogenase family 2 member B7a
GeneID:101245969	8.63059	-4.84965	0.00483512	0.0681464	101245969
GeneID:101260209	101.326	-3.01835	0.00484616	0.0681952	101260209	uncharacterized protein LOC101260209
GeneID:101268768	27.4012	-3.69303	0.00486941	0.0683214	101268768	cyclin-dependent kinase C-2 isoform X1
GeneID:101254846	34.8877	-3.24886	0.00487033	0.0683214	101254846	probable protein phosphatase 2C 10
GeneID:101249288	16.3783	-3.89569	0.00489161	0.068513	101249288
GeneID:101250420	30.822	-3.54132	0.00491639	0.068753	101250420	uncharacterized protein LOC101250420
GeneID:101267225	8.7315	-4.87322	0.00499471	0.0692602	101267225	uncharacterized protein LOC101267225
GeneID:101250723	8.79838	-4.85655	0.00498173	0.0692602	101250723	ubiquitin carboxyl-terminal hydrolase 2
GeneID:101259420	24.4787	-4.18948	0.00497564	0.0692602	101259420	adenosylhomocysteinase
GeneID:101251171	24.6172	-3.34304	0.00498511	0.0692602	101251171	protein-L-isoaspartate O-methyltransferase 1
GeneID:100736499	78.0989	-3.06523	0.00499887	0.0692602	100736499	glyceraldehyde 3-phosphate dehydrogenase
GeneID:101255347	15.8524	-3.85112	0.00502202	0.0694738	101255347	very-long-chain 3-oxoacyl-CoA reductase 1
GeneID:101244359	64.9161	-2.99488	0.00504451	0.0696778	101244359	protein kinase family protein
GeneID:101268620	37.1653	-3.47407	0.00509286	0.0702377	101268620	serine/threonine-protein kinase SRK2E
GeneID:101257393	15.9349	-4.24686	0.00511387	0.0703455	101257393	P-loop containing nucleoside triphosphate hydrolases superfamily protein
GeneID:101244013	50.2869	-3.40566	0.00511632	0.0703455	101244013	probable glutathione S-transferase
GeneID:101264722	13.7179	-4.03424	0.00515338	0.0707469	101264722	uncharacterized protein LOC101264722 isoform X1
GeneID:101259298	9.34075	-4.9735	0.00517718	0.0708573	101259298	glycine-rich protein 2-like
GeneID:101262151	22.6727	-3.59004	0.00517686	0.0708573	101262151	E3 ubiquitin-protein ligase PRT1
GeneID:101262718	55.943	-3.04657	0.00521042	0.0712039	101262718	cyclin-dependent kinase G-2 isoform X1
GeneID:101247934	15.8633	-4.23082	0.00521843	0.0712051	101247934	ADP,ATP carrier protein 1, mitochondrial
GeneID:101256945	42.5046	-3.19573	0.00529688	0.072166	101256945	SNW/SKI-interacting protein A
GeneID:101244058	10.2644	-4.17567	0.00532913	0.0722769	101244058	60S ribosomal protein L18a-like protein
GeneID:101257576	28.3383	-3.42703	0.00532695	0.0722769	101257576	fimbrin-2
GeneID:543984	61.3509	-3.3289	0.00534389	0.0723679	543984	calmodulin
GeneID:101258382	12.2891	-4.43894	0.0053525	0.0723755	101258382	alpha/beta hydrolase domain-containing protein 17B
GeneID:101268236	35.1998	-3.77698	0.00539583	0.0728519	101268236	uncharacterized protein LOC101268236
GeneID:101253943	14.5169	-4.63339	0.00547309	0.0729121	101253943	BTB/POZ domain-containing protein At3g05675-like isoform X1
GeneID:101249491	9.96026	-4.14077	0.005445	0.0729121	101249491	rho GDP-dissociation inhibitor 1
GeneID:101257028	20.8014	-3.66892	0.00544547	0.0729121	101257028	lipase-like PAD4 isoform X1
GeneID:101262486	56.4259	-3.30345	0.00546795	0.0729121	101262486	transcription factor MYB48
GeneID:101259670	81.8684	-2.88095	0.00547022	0.0729121	101259670	N-terminal acetyltransferase A complex subunit NAA10
GeneID:101248484	548.629	-2.73186	0.0054362	0.0729121	101248484	dnaJ protein homolog
GeneID:543953	8.22997	-4.77182	0.00550673	0.0729885	543953	ethylene-responsive proteinase inhibitor 1 precursor
GeneID:101250115	10.5123	-4.19032	0.00553497	0.0729885	101250115	F-box/FBD/LRR-repeat protein At1g13570-like
GeneID:101251644	14.2135	-4.08898	0.00553583	0.0729885	101251644	vesicle-associated protein 4-2
GeneID:101254442	16.7713	-3.91448	0.0055324	0.0729885	101254442	shaggy-related protein kinase epsilon isoform X1
GeneID:100316880	24.0341	-3.87717	0.00553554	0.0729885	100316880	haloacid dehalogenase
GeneID:101255669	19.991	-3.63058	0.00551053	0.0729885	101255669	uncharacterized protein LOC101255669 isoform X1
GeneID:101055566	141.155	-3.0485	0.00549246	0.0729885	101055566	tonoplast intrinsic protein 2.2
GeneID:101243720	10.7179	-4.24571	0.00556402	0.0731824	101243720	uncharacterized protein LOC101243720
GeneID:101248051	22.8877	-3.40619	0.00559779	0.0734822	101248051	microfibrillar-associated protein 1A-like
GeneID:101267717	8.57955	-4.85602	0.00565354	0.0734848	101267717	uncharacterized protein LOC101267717
GeneID:101260321	8.44406	-4.80687	0.00560905	0.0734848	101260321	mannose-P-dolichol utilization defect 1 protein homolog 2
GeneID:101256196	12.3639	-4.43051	0.00567788	0.0734848	101256196	membrin-11
GeneID:100134883	17.4523	-4.36223	0.0056787	0.0734848	100134883	C2H2-type zinc finger protein
GeneID:101264925	10.0647	-4.16111	0.00568788	0.0734848	101264925	protein TRIGALACTOSYLDIACYLGLYCEROL 5, chloroplastic isoform X2
GeneID:100736526	17.3242	-3.96962	0.00567975	0.0734848	100736526	2-oxoglutarate Fe(II) dependent oxygenase superfamily protein
GeneID:101261009	13.0502	-3.93581	0.00564732	0.0734848	101261009	uncharacterized protein LOC101261009
GeneID:101259309	21.7132	-3.7231	0.00562828	0.0734848	101259309	uncharacterized protein LOC101259309
GeneID:101265657	18.2664	-3.4768	0.00564434	0.0734848	101265657	uncharacterized protein LOC101265657 isoform X1
GeneID:101246199	18.2137	-3.47179	0.00562154	0.0734848	101246199	hippocampus abundant transcript-like protein 1 isoform X1
GeneID:101247368	14.2529	-4.10135	0.00575102	0.0735824	101247368	auxin-induced protein 10A5
GeneID:101257552	13.6734	-4.04055	0.00574346	0.0735824	101257552	uncharacterized protein LOC101257552
GeneID:100736464	17.6633	-4.0114	0.00571263	0.0735824	100736464	prephenate aminotransferase
GeneID:101250322	19.3523	-3.55721	0.0057301	0.0735824	101250322	ABC transporter C family member 3
GeneID:101247807	20.5367	-3.43557	0.00575272	0.0735824	101247807	probable low-specificity L-threonine aldolase 1 isoform X1
GeneID:101244430	12.1863	-3.85921	0.0057872	0.0738135	101244430	aquaporin SIP1-2-like isoform X1
GeneID:101257981	57.7384	-3.6433	0.00577987	0.0738135	101257981	zinc transporter 5-like
GeneID:101261117	11.0887	-4.28843	0.00582368	0.0741736	101261117	uncharacterized protein LOC101261117
GeneID:101266980	11.2643	-4.316	0.00588133	0.0746962	101266980	uncharacterized protein LOC101266980
GeneID:101252689	17.4569	-3.65827	0.00592844	0.0750487	101252689	two-component response regulator ORR26 isoform X1
GeneID:104647186	43.3795	-2.99646	0.00593413	0.0750487	104647186	protein RER1A
GeneID:100134908	18.5568	-3.76885	0.00596909	0.0753849	100134908	inositol-1,4,5-triphosphate-5-phosphatase
GeneID:101244860	16.5683	-3.8798	0.0059969	0.0754184	101244860
GeneID:101268716	17.09	-3.63809	0.00599043	0.0754184	101268716	ER membrane protein complex subunit 6
GeneID:101260946	29.8543	-3.50916	0.00598821	0.0754184	101260946	protein NRT1/ PTR FAMILY 8.1
GeneID:101256680	16.0941	-4.2402	0.00603686	0.0758149	101256680	uncharacterized protein LOC101256680
GeneID:101263419	9.49245	-4.97723	0.0061203	0.0762241	101263419	CASP-like protein 4A3
GeneID:109119038	8.20857	-4.78414	0.00610827	0.0762241	109119038	BRI1 kinase inhibitor 1
GeneID:101264242	11.9685	-3.8456	0.00611434	0.0762241	101264242	ETHYLENE INSENSITIVE 3-like 3 protein isoform X2
GeneID:101246027	21.0363	-3.69176	0.00608737	0.0762241	101246027	U-box domain-containing protein 32 isoform X1
GeneID:101260078	17.9202	-3.44836	0.00611846	0.0762241	101260078	probable aquaporin SIP2-1
GeneID:101263479	24.5625	-3.35127	0.00608963	0.0762241	101263479	heterogeneous nuclear ribonucleoprotein 1
GeneID:101264646	20.1246	-4.55647	0.00619467	0.0768309	101264646	long chain acyl-CoA synthetase 8-like
GeneID:101245758	19.8488	-3.38885	0.00618869	0.0768309	101245758	bZIP transcription factor 60
GeneID:101265773	10.5704	-5.07874	0.00624997	0.0774101	101265773	NAD(P)H
GeneID:101264019	11.7073	-4.35982	0.00627307	0.0775893	101264019	vesicle-associated membrane protein 711
GeneID:101252579	9.69173	-4.97484	0.00630253	0.0778467	101252579	uncharacterized protein LOC101252579
GeneID:101265620	13.7373	-4.03528	0.00634027	0.0780982	101265620	homeobox-leucine zipper protein PROTODERMAL FACTOR 2-like
GeneID:101256174	9.02221	-4.8857	0.00640579	0.0782535	101256174	tropinone reductase 2
GeneID:101252221	12.6761	-4.47153	0.00641379	0.0782535	101252221	histone-lysine N-methyltransferase SETD1B
GeneID:104646471	9.67628	-4.08046	0.00638425	0.0782535	104646471
GeneID:101259856	18.0367	-3.72549	0.00640987	0.0782535	101259856	monogalactosyldiacylglycerol synthase 2, chloroplastic
GeneID:101245369	16.1579	-3.55533	0.00637703	0.0782535	101245369	uncharacterized protein LOC101245369
GeneID:543982	21.4523	-3.31224	0.00638128	0.0782535	543982	plasma membrane ATPase 1
GeneID:101261607	37.4427	-3.0746	0.00640138	0.0782535	101261607	exocyst complex component EXO70B1
GeneID:101264656	10.5086	-4.21897	0.00644373	0.078406	101264656	elicitor-responsive protein 3
GeneID:101249935	15.1141	-4.15187	0.00643503	0.078406	101249935	S-alkyl-thiohydroximate lyase-like
GeneID:101248281	23.1924	-3.25462	0.00647576	0.078583	101248281	RWD domain-containing protein 1 isoform X1
GeneID:543737	26.6012	-3.8482	0.00653495	0.0788536	543737	hexose transporter 1
GeneID:101254574	16.8928	-3.60597	0.0065312	0.0788536	101254574	uncharacterized protein LOC101254574 isoform X3
GeneID:101244811	1327.47	-3.05325	0.00650833	0.0788536	101244811	probable H/ACA ribonucleoprotein complex subunit 1
GeneID:100037509	18.1617	-4.02789	0.00655319	0.0788839	100037509	zinc transporter-like precursor
GeneID:101247238	9.29774	-4.94875	0.00657119	0.0788894	101247238	mediator of RNA polymerase II transcription subunit 30
GeneID:101261699	14.3848	-3.68538	0.00656704	0.0788894	101261699	uncharacterized protein LOC101261699
GeneID:543632	51.518	-2.97596	0.00660723	0.0792163	543632	cysteine proteinase inhibitor A
GeneID:101247189	11.3573	-5.18353	0.00663168	0.0792448	101247189	uncharacterized protein LOC101247189
GeneID:101262588	8.20745	-4.77485	0.0066352	0.0792448	101262588	protein UPSTREAM OF FLC
GeneID:101256208	16.4984	-3.59958	0.00663605	0.0792448	101256208	probable polyamine transporter At1g31830 isoform X1
GeneID:101267555	131.544	-2.42789	0.00664928	0.0792976	101267555	probable indole-3-pyruvate monooxygenase YUCCA8
GeneID:101252464	8.61933	-4.81087	0.00667825	0.0795375	101252464	tetraspanin-8
GeneID:778235	65.9942	-2.86156	0.00668755	0.0795429	778235	EIN3-binding F-box protein 2
GeneID:101262251	10.3483	-5.07411	0.00673772	0.0797852	101262251	uncharacterized protein LOC101262251
GeneID:101252120	8.418	-4.80983	0.00680869	0.0797852	101252120	uncharacterized protein LOC101252120
GeneID:101255895	8.72376	-4.80308	0.00681439	0.0797852	101255895	myb-related protein 330
GeneID:101254606	10.3251	-4.1928	0.00678789	0.0797852	101254606	RNA-binding KH domain-containing protein PEPPER
GeneID:101250258	12.9366	-3.92374	0.00680008	0.0797852	101250258	uncharacterized protein LOC101250258
GeneID:101251417	16.3749	-3.89293	0.00676901	0.0797852	101251417	long-chain-alcohol oxidase FAO2-like
GeneID:101248248	14.7208	-3.73195	0.00674869	0.0797852	101248248	uncharacterized protein LOC101248248
GeneID:101261813	18.6364	-3.50447	0.00677561	0.0797852	101261813	protein ASPARTIC PROTEASE IN GUARD CELL 1
GeneID:101253697	21.2578	-3.49943	0.00676395	0.0797852	101253697	serine/threonine-protein kinase MHK
GeneID:101259184	26.4785	-3.46449	0.00675464	0.0797852	101259184	LOW QUALITY PROTEIN
GeneID:101245875	23.6757	-3.45114	0.00679298	0.0797852	101245875	TOM1-like protein 6
GeneID:101249542	11.7046	-3.81513	0.00682999	0.0798638	101249542	alpha-galactosidase 1
GeneID:101267354	13.1578	-3.96185	0.00688829	0.0803967	101267354	calmodulin-binding protein 60 C
GeneID:543810	267.967	-2.75698	0.00689344	0.0803967	543810	NEDD8-conjugating enzyme Ubc12
GeneID:101263948	21.6052	-3.75619	0.00692184	0.0806233	101263948	uncharacterized protein LOC101263948
GeneID:101246293	13.9061	-3.6629	0.00694121	0.0806465	101246293	probable BOI-related E3 ubiquitin-protein ligase 3
GeneID:101253762	16.2642	-3.55308	0.00694177	0.0806465	101253762	15-cis-zeta-carotene isomerase
GeneID:101264006	11.5046	-4.32652	0.00695292	0.0806718	101264006	putative oligosaccharyltransferase complex subunit CG9662
GeneID:101255037	19.9134	-3.39698	0.00697853	0.0808646	101255037	pyruvate, phosphate dikinase regulatory protein 1, chloroplastic
GeneID:101268392	14.1124	-4.05974	0.00701881	0.0811223	101268392	RNA-binding protein 24-B
GeneID:101251751	27.1348	-3.21926	0.00701728	0.0811223	101251751	nucleoside/nucleotide kinase superfamily protein
GeneID:101262559	13.9867	-3.64583	0.0070844	0.0817752	101262559	protein CIA1
GeneID:101250202	10.4173	-5.08248	0.00716973	0.0821277	101250202	probable E3 ubiquitin-protein ligase RNF217
GeneID:101243968	13.6141	-3.61575	0.00715017	0.0821277	101243968	diacylglycerol kinase 1-like
GeneID:101245308	15.7255	-3.51501	0.00713193	0.0821277	101245308	uncharacterized protein LOC101245308
GeneID:101259575	24.8158	-3.38404	0.00713412	0.0821277	101259575	uncharacterized protein LOC101259575
GeneID:543669	47.9645	-3.0419	0.00715694	0.0821277	543669	eukaryotic translation initiation factor 5A-3
GeneID:101252187	9.09646	-4.88087	0.00724783	0.0828113	101252187	uncharacterized protein LOC101252187
GeneID:101249423	14.5028	-4.10043	0.00724191	0.0828113	101249423	zingipain-2
GeneID:778284	109.25	-2.3657	0.00728911	0.0831773	778284	ribosomal protein L3
GeneID:101259866	13.3832	-3.59038	0.00733841	0.0836337	101259866	transmembrane protein 64
GeneID:543679	26.0995	-3.14932	0.00736154	0.0837911	543679	EIL1 protein
GeneID:101263864	12.3504	-4.40304	0.00737237	0.0838083	101263864	protein DJ-1 homolog D
GeneID:101267985	13.3516	-3.59012	0.00738524	0.0838486	101267985	protein PLANT CADMIUM RESISTANCE 2
GeneID:101252894	9.57455	-4.93141	0.00746507	0.0840779	101252894	uncharacterized protein LOC101252894
GeneID:101267635	20.5382	-4.2053	0.00744001	0.0840779	101267635	receptor-like protein Cf-9 homolog isoform X2
GeneID:101246665	15.3135	-3.79475	0.00747387	0.0840779	101246665	BAG family molecular chaperone regulator 6
GeneID:101254627	15.7737	-3.51998	0.00745779	0.0840779	101254627	TATA-box-binding protein isoform X2
GeneID:101245976	18.0942	-3.48148	0.00747963	0.0840779	101245976	YJU2 splicing factor homolog
GeneID:101259273	23.0911	-3.43144	0.00744973	0.0840779	101259273	mediator of RNA polymerase II transcription subunit 10b
GeneID:101267740	19.824	-3.39807	0.00745051	0.0840779	101267740	lysophospholipid acyltransferase LPEAT2
GeneID:101265359	18.8664	-3.30346	0.00748024	0.0840779	101265359	casein kinase 1-like protein HD16
GeneID:101250862	30.4896	-3.2857	0.00750099	0.0842059	101250862	protein BUD31 homolog 1
GeneID:101254956	19.4973	-3.35596	0.00752955	0.0842111	101254956	BTB/POZ domain-containing protein At4g08455
GeneID:101268431	19.3241	-3.3485	0.00751637	0.0842111	101268431	peptidyl-prolyl cis-trans isomerase CYP22 isoform X1
GeneID:101260029	32.6036	-3.04109	0.00752235	0.0842111	101260029	myb-like protein X
GeneID:101265365	29.626	-3.49003	0.00756967	0.0845547	101265365	uncharacterized protein LOC101265365
GeneID:101247148	41.5974	-3.01162	0.00759564	0.0847395	101247148	NAC domain-containing protein 79
GeneID:101265944	11.7757	-3.82739	0.00763642	0.0847421	101265944	prefoldin subunit 6
GeneID:778250	49.9745	-3.68508	0.00761523	0.0847421	778250	peptidyl-prolyl isomerase FKBP12
GeneID:101245795	13.4142	-3.59898	0.007643	0.0847421	101245795	uncharacterized protein LOC101245795
GeneID:101268517	31.183	-3.08177	0.0076422	0.0847421	101268517	heterogeneous nuclear ribonucleoprotein Q
GeneID:101262225	19.454	-4.12707	0.00773819	0.0851679	101262225	probably inactive leucine-rich repeat receptor-like protein kinase At5g48380
GeneID:101243823	9.35438	-4.03715	0.00771962	0.0851679	101243823	transcription factor UNE12
GeneID:101249070	15.2908	-3.80905	0.00780105	0.0851679	101249070	uncharacterized WD repeat-containing protein C2A9.03 isoform X1
GeneID:101249013	15.1474	-3.79155	0.00772939	0.0851679	101249013	putative methyltransferase C9orf114 isoform X2
GeneID:112941885	16.7244	-3.59102	0.00770296	0.0851679	112941885	uncharacterized protein LOC112941885
GeneID:101252441	18.7752	-3.53236	0.00771942	0.0851679	101252441	guanine nucleotide-binding protein subunit beta
GeneID:101249712	19.0066	-3.52837	0.00779835	0.0851679	101249712	auxin response factor 2B
GeneID:101258583	24.9013	-3.51223	0.00775354	0.0851679	101258583	protein SPIRAL1-like 1
GeneID:101257080	45.0114	-2.93263	0.00782068	0.0852407	101257080	uncharacterized protein LOC101257080
GeneID:101249752	13.257	-3.57319	0.00783465	0.0852896	101249752	uncharacterized protein LOC101249752
GeneID:101264406	11.3583	-4.29695	0.00788554	0.0855645	101264406	heterogeneous nuclear ribonucleoprotein H isoform X1
GeneID:101257191	10.4207	-4.17377	0.00789797	0.0855645	101257191	uncharacterized protein LOC101257191
GeneID:101255071	35.7396	-3.21441	0.0078934	0.0855645	101255071	peptidyl-prolyl cis-trans isomerase NIMA-interacting 4
GeneID:101255815	9.78728	-4.99457	0.00793866	0.0856839	101255815	glutaredoxin-C6
GeneID:101262653	12.8159	-3.93215	0.00795664	0.0856839	101262653	U-box domain-containing protein 9
GeneID:101247650	12.0543	-3.83487	0.00792447	0.0856839	101247650	receptor-like protein Cf-9 homolog isoform X1
GeneID:101262117	17.6257	-3.41512	0.00795009	0.0856839	101262117	mitochondrial import receptor subunit TOM9-2
GeneID:101252719	32.6765	-3.05572	0.00795607	0.0856839	101252719	40S ribosomal protein S3a
GeneID:101246295	8.69048	-4.80342	0.00798171	0.0858117	101246295	zeatin O-glucosyltransferase
GeneID:101247413	18.9096	-3.53348	0.00798759	0.0858117	101247413	agamous-like MADS-box protein AGL70
GeneID:104644439	18.0976	-4.02157	0.00802598	0.0859162	104644439	dehydrodolichyl diphosphate synthase 2
GeneID:101268532	11.7782	-3.81968	0.0080181	0.0859162	101268532	uncharacterized protein LOC101268532
GeneID:101260270	8.90479	-4.88346	0.00810588	0.0861639	101260270	geraniol 8-hydroxylase-like
GeneID:101055555	8.56813	-4.7969	0.00816221	0.0861639	101055555	IAA35
GeneID:101261641	12.7885	-4.46373	0.00813821	0.0861639	101261641	EPIDERMAL PATTERNING FACTOR-like protein 2
GeneID:108348021	10.393	-4.19926	0.00814091	0.0861639	108348021	subtilisin-like serine protease family protein
GeneID:101257134	19.5365	-3.6063	0.0081641	0.0861639	101257134	FT-interacting protein 1-like
GeneID:101254537	13.2638	-3.58042	0.0081195	0.0861639	101254537	phosphatidylinositol 4-phosphate 5-kinase 8 isoform X1
GeneID:101251939	12.9374	-3.54901	0.00814605	0.0861639	101251939	protein PGR
GeneID:101252247	22.2866	-3.38647	0.00813059	0.0861639	101252247
GeneID:101258581	20.8908	-3.27114	0.00809287	0.0861639	101258581	probable polygalacturonase isoform X4
GeneID:104648118	22.3691	-3.20948	0.00806261	0.0861639	104648118	(E,E)-germacrene B synthase-like
GeneID:100134877	60.1581	-2.79031	0.00817986	0.0862289	100134877	sulfite oxidase
GeneID:101258181	9.96292	-4.1132	0.0082326	0.086521	101258181	nuclear transcription factor Y subunit B-10 isoform X1
GeneID:101257586	17.055	-3.36988	0.00823643	0.086521	101257586	uncharacterized protein LOC101257586
GeneID:544142	26.8828	-3.20929	0.00823446	0.086521	544142	H1 histone-like protein
GeneID:101255554	11.0331	-4.22247	0.00825661	0.0866318	101255554	UPF0183 protein At3g51130-like
GeneID:101266615	46.0205	-2.84739	0.00827026	0.0866739	101266615	ubiquitin-conjugating enzyme E2 32
GeneID:101252482	14.0643	-4.07307	0.00828098	0.0866852	101252482	uncharacterized protein LOC101252482
GeneID:101260589	10.9127	-3.69647	0.00834444	0.0872479	101260589	glucuronokinase 1
GeneID:101265925	14.3534	-3.68945	0.00836622	0.087374	101265925	alcohol dehydrogenase 1B
GeneID:101243980	10.1252	-4.14903	0.00839542	0.0874758	101243980	myosin-binding protein 2 isoform X1
GeneID:101255927	46.5216	-2.93392	0.00839194	0.0874758	101255927	translationally-controlled tumor protein homolog
GeneID:101260188	31.8498	-3.2368	0.00841103	0.0875371	101260188	calcium-dependent protein kinase 32-like
GeneID:101248534	41.2218	-2.85079	0.0084454	0.0877931	101248534	probable E3 ubiquitin-protein ligase ARI8
GeneID:100316899	30.6796	-3.18112	0.00846727	0.0878175	100316899	squalene synthase
GeneID:101256799	13.1665	-3.57248	0.00851887	0.0882507	101256799	PRA1 family protein A1
GeneID:104649409	206.635	-2.81213	0.0085314	0.0882789	104649409	uncharacterized protein LOC104649409
GeneID:101257363	11.6839	-4.33571	0.00859087	0.0887921	101257363	dynamin-related protein 4C
GeneID:101259267	13.0975	-3.9429	0.00863228	0.0890316	101259267	PHD finger protein ALFIN-LIKE 4
GeneID:101267526	21.2337	-3.47792	0.00863384	0.0890316	101267526	probable acyl-CoA dehydrogenase IBR3
GeneID:101248595	13.3666	-3.59486	0.0086585	0.0891836	101248595	beta-glucosidase 18-like
GeneID:101259986	55.2591	-2.83892	0.0086823	0.0893264	101259986	O-acyltransferase WSD1
GeneID:101248194	49.4978	-2.85085	0.00869697	0.0893751	101248194	uncharacterized protein LOC101248194
GeneID:101267260	18.708	-4.46329	0.00877087	0.0900316	101267260	fatty acyl-CoA reductase 2-like isoform X1
GeneID:101247736	11.6743	-3.77774	0.00885008	0.090741	101247736	PGR5-like protein 1B, chloroplastic
GeneID:101244486	21.4128	-3.31209	0.00886839	0.0908252	101244486	ABC transporter G family member 32
GeneID:543718	18.6554	-3.29909	0.00891033	0.0911509	543718
GeneID:104646741	12.6903	-4.4335	0.00898184	0.0915293	104646741	uncharacterized protein LOC104646741
GeneID:101260084	10.642	-4.20779	0.00898803	0.0915293	101260084	protein DMR6-LIKE OXYGENASE 2-like
GeneID:101254080	23.2941	-3.65943	0.00896214	0.0915293	101254080	programmed cell death 6-interacting protein isoform X1
GeneID:101243846	167.921	-2.61593	0.00898213	0.0915293	101243846	14-3-3 protein 1
GeneID:101262596	26.9555	-3.0803	0.00900376	0.0915857	101262596	eukaryotic translation initiation factor 5
GeneID:101251591	8.51821	-4.78629	0.00903891	0.0916323	101251591	uncharacterized protein LOC101251591 isoform X1
GeneID:101250016	20.7387	-3.2551	0.0090225	0.0916323	101250016	uncharacterized protein LOC101250016
GeneID:101263322	9.01555	-3.98937	0.00907168	0.0916545	101263322	uncharacterized protein LOC101263322 isoform X2
GeneID:101253727	19.1608	-3.57444	0.00907138	0.0916545	101253727	importin subunit alpha-4
GeneID:101262372	8.93202	-3.98217	0.00911428	0.0918785	101262372	transcription factor SRM1
GeneID:101259911	11.9239	-3.83584	0.00913246	0.0919587	101259911	putative receptor-like protein kinase At4g00960 isoform X2
GeneID:101255110	15.5949	-3.81223	0.00916713	0.0922045	101255110	LOW QUALITY PROTEIN
GeneID:101244425	9.65441	-4.0566	0.00919311	0.092282	101244425	RING-H2 finger protein
GeneID:101245764	20.123	-3.22059	0.00919536	0.092282	101245764	bet1-like SNARE 1-1 isoform X1
GeneID:101245500	25.3183	-3.11003	0.00924173	0.092644	101245500	chaperone protein dnaJ C76, chloroplastic
GeneID:101267134	11.8387	-3.79101	0.00929058	0.0929265	101267134
GeneID:101267290	83.1099	-2.86455	0.00928986	0.0929265	101267290	60S ribosomal protein L26-1
GeneID:101268698	9.23885	-4.90861	0.00933402	0.0929823	101268698	serine/threonine-protein kinase ppk1 isoform X2
GeneID:101245413	9.50427	-4.04265	0.00933752	0.0929823	101245413	uncharacterized protein At3g27210
GeneID:101259036	26.8426	-3.22063	0.0093249	0.0929823	101259036	transcription initiation factor TFIID subunit 2 isoform X1
GeneID:101257677	56.9612	-3.06093	0.0093145	0.0929823	101257677	UDP-glucuronate 4-epimerase 1
GeneID:101055565	15.333	-3.80242	0.00935124	0.0930159	101055565	ERF6
GeneID:101265149	16.7873	-3.61303	0.00937038	0.0931033	101265149	thioredoxin-like protein HCF164, chloroplastic
GeneID:101263060	35.9973	-3.23876	0.00939395	0.0931723	101263060	ribose-phosphate pyrophosphokinase 1 isoform X1
GeneID:100135704	26.7533	-3.21299	0.00940841	0.0931723	100135704	DNA cytosine 5-methyltransferase-like
GeneID:101261866	42.8378	-2.78806	0.00940728	0.0931723	101261866	ATP-dependent Clp protease proteolytic subunit 3, chloroplastic
GeneID:101247622	9.96967	-4.13328	0.00952116	0.0936272	101247622	uncharacterized protein At4g00950-like
GeneID:101252521	13.6949	-4.03319	0.00952479	0.0936272	101252521	casein kinase 1-like protein 7
GeneID:101245105	27.0355	-3.23542	0.00950593	0.0936272	101245105	regulatory component of ABA receptor3-like
GeneID:101264013	24.6	-3.21736	0.00952723	0.0936272	101264013	uncharacterized protein LOC101264013
GeneID:101264699	15.0822	-3.77895	0.00962587	0.0942954	101264699	uncharacterized protein LOC101264699
GeneID:101260671	41.6606	-2.96249	0.00962669	0.0942954	101260671	FACT complex subunit SPT16-like
GeneID:543542	8.89962	-4.85275	0.00968629	0.0945032	543542
GeneID:104647298	14.8089	-4.10539	0.00966691	0.0945032	104647298
GeneID:101259060	14.4924	-3.38496	0.009676	0.0945032	101259060	uncharacterized protein LOC101259060 isoform X1
GeneID:101265986	46.2508	-2.99535	0.00968994	0.0945032	101265986	protein DETOXIFICATION 27
GeneID:101247503	13.6674	-3.62162	0.00973492	0.0946967	101247503	purine permease 1-like
GeneID:101055606	17.5371	-3.43387	0.00974097	0.0946967	101055606	Hop-interacting protein THI063
GeneID:101254502	25.5722	-3.12415	0.00981275	0.0951847	101254502	protein NRT1/ PTR FAMILY 6.3
GeneID:101244237	62.3524	-2.77916	0.0098028	0.0951847	101244237	hydroquinone glucosyltransferase
GeneID:101260762	44.2342	-2.84795	0.00985832	0.0954209	101260762	E3 ubiquitin-protein ligase CIP8
GeneID:101261839	19.5321	-3.37294	0.00995887	0.0960838	101261839	potassium channel AKT1-like
GeneID:101268580	81.8499	-2.59663	0.00994179	0.0960838	101268580	60S ribosomal protein L27a-3-like
GeneID:101254743	20.9866	-3.1134	0.0099744	0.0961305	101254743
GeneID:101247819	9.66824	-4.05145	0.00999261	0.0961499	101247819	uncharacterized protein LOC101247819 isoform X1
GeneID:104647881	8.78288	-3.94174	0.0100085	0.0961499	104647881
GeneID:101263763	17.6409	-3.20804	0.0100042	0.0961499	101263763	bromodomain-containing protein 4
GeneID:101268408	9.66194	-4.09446	0.0100651	0.0965906	101268408	G-type lectin S-receptor-like serine/threonine-protein kinase At2g19130
GeneID:101251977	16.7604	-3.61657	0.0101118	0.0969351	101251977	G-type lectin S-receptor-like serine/threonine-protein kinase At4g27290
GeneID:101244696	29.3311	-3.67108	0.010154	0.0970294	101244696	uncharacterized protein At4g15970
GeneID:108281193	22.2453	-3.56819	0.0101469	0.0970294	108281193	(+)-neomenthol dehydrogenase
GeneID:101258170	41.6767	-3.27725	0.0101703	0.0970824	101258170	nuclear transcription factor Y subunit B-3
GeneID:101260892	10.776	-4.21053	0.010271	0.0975164	101260892	uncharacterized protein LOC101260892
GeneID:101253978	9.2355	-4.01472	0.0103318	0.0975164	101253978	elongation of fatty acids protein 3-like
GeneID:101251368	11.8298	-3.8309	0.0103094	0.0975164	101251368	protein ECERIFERUM 3 isoform X1
GeneID:101246396	12.4427	-3.49775	0.0102529	0.0975164	101246396	alpha-dioxygenase 1-like
GeneID:101253229	17.9964	-3.48386	0.0102484	0.0975164	101253229	uncharacterized protein LOC101253229
GeneID:101244332	23.9822	-3.17168	0.0102515	0.0975164	101244332	protein SMG7-like
GeneID:101259804	45.8033	-3.04822	0.0103133	0.0975164	101259804	protein DEHYDRATION-INDUCED 19
GeneID:101265895	51.6113	-2.83908	0.0103278	0.0975164	101265895	cyclic nucleotide-gated ion channel 4
GeneID:101244048	64.7535	-2.61929	0.0103351	0.0975164	101244048	SUMO-conjugating enzyme SCE1
GeneID:101253225	376.105	-2.48088	0.0103101	0.0975164	101253225	stem-specific protein TSJT1
GeneID:101255677	9.66168	-4.93006	0.0103591	0.0975383	101255677	calmodulin-binding protein 60 B
GeneID:101260550	11.21	-3.73353	0.0103529	0.0975383	101260550	beta-glucuronosyltransferase GlcAT14B
GeneID:101244370	42.299	-2.92083	0.0104081	0.0978971	101244370	endoglucanase 25-like
GeneID:101268866	13.1773	-4.49716	0.0104599	0.098282	101268866	serine/threonine protein kinase Pto isoform X1
GeneID:101248158	13.1518	-3.54845	0.010507	0.0986206	101248158	potassium transporter 8-like
GeneID:101253271	86.9511	-2.65962	0.0105285	0.0987197	101253271	60S ribosomal protein L44
GeneID:101250767	11.289	-4.23247	0.0105726	0.09903	101250767	uncharacterized protein LOC101250767
GeneID:101247976	15.3693	-3.5041	0.0106039	0.0992197	101247976	endoribonuclease Dicer 2d isoform X1
GeneID:101255908	18.0086	-3.48291	0.0106355	0.0993087	101255908	signal peptide peptidase-like 2 isoform X1
GeneID:101250784	14.7531	-3.43404	0.0106768	0.0995908	101250784	uncharacterized protein LOC101250784
GeneID:101257025	8.38109	-4.76458	0.0107616	0.0999872	101257025	probable serine/threonine-protein kinase PIX13
GeneID:101268227	14.0781	-4.53021	0.0107488	0.0999872	101268227	light-regulated protein 1, chloroplastic
GeneID:101252391	23.8024	-3.14871	0.0107637	0.0999872	101252391	ultraviolet-B receptor UVR8
GeneID:101255246	89.8498	9.66377	2.6543e-09	2.38675e-05	101255246	zinc-finger homeodomain protein 4
GeneID:101250573	501.073	4.37008	1.19663e-06	0.00134501	101250573
GeneID:112941381	462.753	4.79427	2.78936e-06	0.00192938	112941381
GeneID:101245013	162.02	6.80545	2.64011e-06	0.00192938	101245013	protein DETOXIFICATION 49 isoform X1
GeneID:101264223	64.2092	6.36635	3.45747e-06	0.00207264	101264223	uncharacterized protein LOC101264223 isoform X1
GeneID:101244725	11.3013	7.04548	5.09581e-06	0.00286385	101244725	zeatin O-glucosyltransferase-like
GeneID:34678303	46.2561	4.8285	5.80302e-06	0.00289893	34678303	ribosomal protein L10
GeneID:101245468	122.086	4.51531	9.64197e-06	0.00324321	101245468	N-terminal acetyltransferase A complex auxiliary subunit NAA15-like
GeneID:101254295	139.543	5.39017	8.31016e-06	0.00324321	101254295	autophagy-related protein 9
GeneID:101246169	111.089	5.45481	8.84198e-06	0.00324321	101246169	phytosulfokine receptor 1
GeneID:101260817	37.2948	5.52811	8.6624e-06	0.00324321	101260817	maintenance of telomere capping protein 1
GeneID:101258623	191.72	5.77054	7.1954e-06	0.00324321	101258623	acylamino-acid-releasing enzyme isoform X1
GeneID:101265940	121.208	5.79887	9.69541e-06	0.00324321	101265940	THO complex subunit 3
GeneID:101247596	18.3494	6.68932	9.40661e-06	0.00324321	101247596	cellulose synthase-like protein D3
GeneID:101261602	47.4701	4.57071	1.30991e-05	0.00382175	101261602	uncharacterized protein LOC101261602
GeneID:101258549	62.0049	5.33229	1.31755e-05	0.00382175	101258549	UBP1-associated protein 2B-like
GeneID:104648152	17.1219	6.15145	1.92929e-05	0.00525702	104648152	uncharacterized protein LOC104648152
GeneID:112940137	11.9746	6.5212	2.46489e-05	0.00569531	112940137
GeneID:101267522	13.2086	6.57703	2.5335e-05	0.00569531	101267522	short-chain dehydrogenase/reductase family 42E member 1
GeneID:543548	190.34	4.41572	2.84425e-05	0.00623793	543548	dehydroquinate dehydratase/shikimate
GeneID:101254824	196.832	5.18623	3.06463e-05	0.00624482	101254824	protein DEFECTIVE IN EXINE FORMATION 1
GeneID:101256387	54.7755	5.50223	3.82574e-05	0.00639338	101256387	3-ketoacyl-CoA synthase 20-like
GeneID:100529139	123.182	6.19344	3.83944e-05	0.00639338	100529139	S-adenosyl-L-methionine
GeneID:544133	116.876	4.47229	5.29293e-05	0.00767645	544133	beta-carotene hydroxylase
GeneID:101260958	279.41	5.34969	4.94918e-05	0.00767645	101260958	TOM1-like protein 9 isoform X1
GeneID:101252684	66.2938	5.996	5.09739e-05	0.00767645	101252684	protein SET DOMAIN GROUP 41
GeneID:101255014	17.1395	5.27605	5.49944e-05	0.00784936	101255014	uncharacterized protein LOC101255014
GeneID:3950389	86.2525	4.53035	5.67864e-05	0.00797848	3950389	acetyl-CoA carboxylase carboxyltransferase beta subunit
GeneID:104645726	81.9046	4.0433	6.85656e-05	0.0085327	104645726	arabinogalactan protein 13
GeneID:101248904	11.321	5.81102	6.82617e-05	0.0085327	101248904	NAC domain-containing protein 7
GeneID:104649476	129.63	5.1408	8.10048e-05	0.00910494	104649476
GeneID:101250621	37.1436	5.13123	8.67806e-05	0.00922286	101250621	zinc finger protein JACKDAW isoform X1
GeneID:101253577	21.0432	5.98372	9.22642e-05	0.00922286	101253577	peptide methionine sulfoxide reductase
GeneID:101252912	15.9313	5.37766	9.61318e-05	0.00935434	101252912	ribosomal protein L2
GeneID:3950462	96.9861	5.6551	0.000105233	0.00985683	3950462	photosystem I subunit VIII
GeneID:101256255	16.3712	5.48404	0.000124922	0.0106482	101256255	ATP sulfurylase 1, chloroplastic-like
GeneID:101260588	74.3807	4.70978	0.000149672	0.0123472	101260588	FT-interacting protein 1-like
GeneID:101263193	149.009	5.67793	0.000154196	0.0123798	101263193	protein TIFY 10b-like
GeneID:101262946	41.3437	4.52715	0.000164653	0.0131023	101262946	uncharacterized protein LOC101262946
GeneID:101264505	27.9714	6.03711	0.00019425	0.0139699	101264505	protein LIFEGUARD 2
GeneID:101267178	64.6898	3.6308	0.000223475	0.0151404	101267178	filament-like plant protein 7
GeneID:544235	31.4453	5.65738	0.000227308	0.0151404	544235
GeneID:101248985	11.9858	5.12436	0.000230368	0.0151446	101248985	histone H2AX-like
GeneID:101258843	125.045	3.16583	0.000245072	0.0154286	101258843	thioredoxin-like 2, chloroplastic
GeneID:544154	213.783	3.61232	0.000254219	0.0157651	544154	chorismate synthase 1, chloroplastic precursor
GeneID:104646580	36.7685	4.67547	0.00026568	0.0161418	104646580
GeneID:101267631	104.236	4.99929	0.000288675	0.0168556	101267631	cation/H(+) antiporter 18-like
GeneID:101251758	10.2823	5.3854	0.00029445	0.0169874	101251758	uncharacterized protein LOC101251758
GeneID:101244660	8.57368	5.54553	0.000319756	0.0180833	101244660	octanoyltransferase LIP2p, chloroplastic
GeneID:101268560	344.057	2.71417	0.000327552	0.0182484	101268560	calcium sensing receptor, chloroplastic
GeneID:101250055	44.952	5.28964	0.000337939	0.0184166	101250055	aldo-keto reductases superfamily protein isoform X1
GeneID:101267331	74.6862	4.73733	0.000345838	0.0186214	101267331	aspartic proteinase-like protein 2
GeneID:101265676	91.9176	4.14171	0.000372913	0.0195997	101265676	uncharacterized protein LOC101265676 isoform X2
GeneID:101263646	17.7693	4.65304	0.00037915	0.0195997	101263646	ribosomal L1 domain-containing protein 1-like
GeneID:34678322	35.197	3.74116	0.000394271	0.0198172	34678322	ribosomal protein L10
GeneID:543977	72.3665	3.74294	0.000427418	0.0207748	543977	3-phosphoshikimate 1-carboxyvinyltransferase, chloroplastic
GeneID:101246905	221.553	4.23993	0.00043126	0.0208489	101246905	1-phosphatidylinositol-3-phosphate 5-kinase FAB1B-like isoform X1
GeneID:101250159	15.6076	4.58302	0.00044254	0.0211666	101250159	pentatricopeptide repeat-containing protein At4g14820
GeneID:543589	163.874	4.96341	0.000456127	0.0212513	543589	ethylene receptor homolog precursor
GeneID:101267305	49.4936	4.03574	0.000482882	0.021646	101267305	O-fucosyltransferase 9 isoform X1
GeneID:101247557	45.0672	4.3153	0.000576397	0.023775	101247557	proteinase inhibitor I precursor
GeneID:101258969	99.0846	3.4914	0.000632293	0.0249006	101258969	uncharacterized protein LOC101258969
GeneID:101261857	62.738	4.7165	0.000662201	0.0251872	101261857	ras-related protein RABA5e
GeneID:3950409	140.102	2.89848	0.000692694	0.0256325	3950409	ribosomal protein S18
GeneID:101251284	13.7502	4.60164	0.000703193	0.0258086	101251284	mechanosensitive ion channel protein 8-like
GeneID:101266234	39.0304	4.9779	0.000735834	0.026361	101266234
GeneID:101244699	186.435	3.44847	0.00080538	0.028055	101244699	BEL1-like homeodomain protein 1 isoform X2
GeneID:101248636	228.537	3.97724	0.000808078	0.028055	101248636	ganglioside-induced differentiation-associated protein 2
GeneID:101259583	9.62853	4.71114	0.000803695	0.028055	101259583	protein DETOXIFICATION 18
GeneID:101249713	53.3097	4.40562	0.000832672	0.028323	101249713	transcription termination factor MTERF8, chloroplastic
GeneID:101263891	17.8905	4.14503	0.000846869	0.0283832	101263891	uncharacterized protein LOC101263891
GeneID:101251132	10.3801	4.53249	0.00085541	0.0283832	101251132	probable magnesium transporter NIPA6
GeneID:101263332	44.6695	4.35548	0.000995262	0.0317354	101263332	U-box domain-containing protein 34 isoform X1
GeneID:101255793	16.9761	4.13043	0.00101041	0.0321047	101255793	probable polygalacturonase
GeneID:101250072	40.1364	4.14428	0.00107439	0.0331541	101250072	apyrase isoform X1
GeneID:101260246	19.9458	4.18717	0.00107662	0.0331541	101260246	protein ULTRAPETALA 2 isoform X1
GeneID:100529135	59.089	2.98539	0.00112283	0.0337675	100529135	calcium dependent protein kinase
GeneID:101249903	124.145	3.64857	0.00117827	0.0338779	101249903	uncharacterized protein LOC101249903
GeneID:101255019	8.29934	5.25047	0.00126263	0.0347203	101255019	cyclin-dependent kinase F-4-like
GeneID:101260404	163.231	3.95759	0.00127128	0.0348516	101260404	TNF receptor-associated factor homolog 1b-like
GeneID:101256378	9.6896	4.76966	0.00129714	0.0352131	101256378	uncharacterized protein LOC101256378
GeneID:101252066	25.8016	4.52702	0.00130823	0.0353261	101252066	cytochrome P450 71A1-like
GeneID:101262835	9.62793	4.98765	0.00132688	0.03551	101262835	EKC/KEOPS complex subunit bud32-like
GeneID:101251031	9.79923	4.60105	0.00136737	0.0359985	101251031	rac-like GTP-binding protein 5
GeneID:34678312	405.018	3.3029	0.00142309	0.0363738	34678312	ribosomal protein S10
GeneID:101263886	13.3746	4.0626	0.00140408	0.0363738	101263886	serine/threonine-protein kinase 38-like
GeneID:101262863	10.8525	5.17129	0.0014866	0.0372355	101262863	glucan endo-1,3-beta-glucosidase 4
GeneID:101257613	70.0211	3.83572	0.00149076	0.0372359	101257613	protein EI24 homolog isoform X1
GeneID:101268285	8.77555	5.38234	0.00159194	0.0393262	101268285	putative E3 ubiquitin-protein ligase RF298
GeneID:101265339	16.4579	3.87848	0.00167785	0.0401604	101265339	vacuolar cation/proton exchanger 3-like
GeneID:101257282	93.864	2.8857	0.00180569	0.0413149	101257282	40S ribosomal protein S3-2
GeneID:778202	90.1459	2.98936	0.00182493	0.041576	778202	proline dehydrogenase
GeneID:101250382	8.71099	4.55688	0.00197687	0.0432506	101250382	probable glucan 1,3-beta-glucosidase A
GeneID:101244537	92.0796	4.1651	0.00209645	0.0450987	101244537	receptor-like protein kinase FERONIA
GeneID:101268581	130.813	3.50401	0.00217184	0.0460261	101268581	muscle M-line assembly protein unc-89
GeneID:101263970	9.11488	4.29718	0.00221623	0.046345	101263970	uncharacterized protein LOC101263970 isoform X1
GeneID:101259745	36.6703	4.49983	0.00236177	0.0480476	101259745	DNA polymerase alpha subunit B
GeneID:112940033	21.8341	4.14281	0.00243821	0.0490671	112940033
GeneID:101266055	20.183	3.41317	0.00259779	0.0515658	101266055	uncharacterized protein LOC101266055
GeneID:101258069	21.6643	3.82722	0.00279472	0.052944	101258069	WEB family protein At5g16730, chloroplastic-like
GeneID:101264678	141.225	3.84571	0.00280075	0.052944	101264678	MADS-box transcription factor 23-like
GeneID:101257978	85	2.93645	0.00282501	0.0531433	101257978	uncharacterized protein LOC101257978
GeneID:101260293	129.888	3.46768	0.0029803	0.0550951	101260293	heterogeneous nuclear ribonucleoprotein 1
GeneID:101249800	19.8884	3.67053	0.00297482	0.0550951	101249800	mitochondrial intermediate peptidase, mitochondrial isoform X1
GeneID:101256057	9.93045	4.42841	0.00298468	0.0550951	101256057	serine/threonine-protein kinase D6PKL1
GeneID:101245270	9.75384	4.16947	0.00311596	0.0560374	101245270	uncharacterized protein LOC101245270 isoform X2
GeneID:101261329	16.8713	4.2412	0.00312748	0.0561324	101261329	tetratricopeptide repeat protein 5
GeneID:101248809	9.54467	3.86771	0.00314294	0.0562974	101248809	uncharacterized oxidoreductase C26H5.09c
GeneID:34678265	75.5956	3.03401	0.00316924	0.0566556	34678265	ATP synthase subunit 4
GeneID:34678308	40.0779	3.36168	0.00322106	0.0568888	34678308	maturase R
GeneID:101259764	75.3331	2.7719	0.00334857	0.0581162	101259764	B3 domain-containing transcription factor VRN1-like isoform X3
GeneID:101262441	151.576	3.14228	0.00333782	0.0581162	101262441	cytochrome b-c1 complex subunit 7
GeneID:101268797	27.697	3.74674	0.00339377	0.0582382	101268797	guanylate-binding protein 4
GeneID:101251271	114.102	3.39153	0.00351246	0.0595926	101251271	probable cyclic nucleotide-gated ion channel 16
GeneID:101255903	91.4059	3.26887	0.00363575	0.06043	101255903	uncharacterized protein LOC101255903
GeneID:101258086	21.7432	3.49696	0.00381892	0.0614758	101258086	protein WVD2-like 5
GeneID:101249973	40.9977	3.70231	0.00382119	0.0614758	101249973	NDR1/HIN1-like protein 3 isoform X2
GeneID:101244990	55.0444	3.28737	0.00392321	0.0617071	101244990	ABC transporter C family member 5
GeneID:101266240	119.043	8.24895	0.00413258	0.0639589	101266240	uncharacterized protein LOC101266240
GeneID:3950484	1792.4	2.51631	0.00416131	0.0639649	3950484	photosystem I P700 apoprotein A1
GeneID:101249218	9.02761	4.45373	0.00424122	0.0643523	101249218	clathrin interactor 1-like
GeneID:101261066	20.8758	3.68652	0.00425899	0.0643645	101261066	actin-related protein 2/3 complex subunit 5A
GeneID:101267844	47.1972	3.70151	0.0043073	0.0646598	101267844	uncharacterized protein LOC101267844 isoform X1
GeneID:3950402	53.9538	2.88357	0.00432359	0.0647962	3950402	NADH-plastoquinone oxidoreductase subunit 6
GeneID:101259643	100.921	3.79013	0.0043934	0.0650831	101259643	beta-galactosidase 17 isoform X2
GeneID:101264078	444.299	2.59687	0.00442083	0.0651697	101264078	5-methyltetrahydropteroyltriglutamate--homocysteine methyltransferase isoform X1
GeneID:101267609	91.0475	2.85812	0.00450004	0.0655824	101267609	protein TSS isoform X2
GeneID:101249390	30.6059	3.29758	0.00450824	0.0655956	101249390	protease Do-like 5, chloroplastic isoform X1
GeneID:101251216	83.6157	3.33189	0.00465961	0.0667184	101251216	uncharacterized protein LOC101251216
GeneID:101259697	55.9596	3.5352	0.00481212	0.0681246	101259697	vacuolar protein sorting-associated protein 60.1
GeneID:104645392	144.557	3.61148	0.00499741	0.0692602	104645392
GeneID:101258733	114.799	3.30111	0.00530809	0.0722093	101258733	GBF-interacting protein 1-like isoform X1
GeneID:101255874	34.1965	3.42126	0.00547328	0.0729121	101255874	protein HOTHEAD
GeneID:101255492	13.6665	3.59009	0.00545022	0.0729121	101255492	uncharacterized protein LOC101255492
GeneID:101257094	10.4523	4.16418	0.00542033	0.0729121	101257094	early nodulin-like protein
GeneID:101246083	13.0067	3.81822	0.00556681	0.0731824	101246083	cytokinin riboside 5'-monophosphate phosphoribohydrolase LOG3
GeneID:101260603	13.8236	3.95248	0.00566771	0.0734848	101260603	probable glucuronoxylan glucuronosyltransferase IRX7
GeneID:3950485	141.878	2.62018	0.00574208	0.0735824	3950485	photosystem II protein M
GeneID:101246440	11.1951	4.5061	0.00574551	0.0735824	101246440	respiratory burst oxidase homolog protein D
GeneID:101253281	77.5394	3.38449	0.0058728	0.0746934	101253281	uncharacterized protein LOC101253281 isoform X2
GeneID:101246403	76.6793	3.23469	0.00589799	0.0748021	101246403	ATP-dependent Clp protease ATP-binding subunit CLPT1, chloroplastic-like
GeneID:100736482	163.279	6.08135	0.00617588	0.0768099	100736482	flavanone 3-dioxygenase
GeneID:101250771	2209.63	2.91566	0.00633658	0.0780982	101250771	ABC transporter F family member 1
GeneID:101266909	17.9391	3.37802	0.00646108	0.0785108	101266909	uncharacterized protein LOC101266909 isoform X3
GeneID:100147714	46.6315	2.93744	0.00654191	0.0788536	100147714	ethylene insensitive 5/7
GeneID:101259349	23.5461	3.23438	0.00652588	0.0788536	101259349	phytochrome F
GeneID:104648561	14.2747	3.85152	0.00674393	0.0797852	104648561	receptor-like protein kinase THESEUS 1
GeneID:101248936	30.5743	2.70332	0.00716272	0.0821277	101248936	protein TRIGALACTOSYLDIACYLGLYCEROL 2, chloroplastic
GeneID:101250158	21.8264	3.55863	0.00763064	0.0847421	101250158	tRNA 2'-phosphotransferase 1 isoform X2
GeneID:544080	194.391	2.66042	0.00779898	0.0851679	544080	histone H4
GeneID:101252292	194.501	2.66056	0.00776807	0.0851679	101252292	protein yippee-like At3g08990
GeneID:101263085	22.3463	2.98249	0.00780453	0.0851679	101263085	monogalactosyldiacylglycerol synthase 2, chloroplastic isoform X2
GeneID:101251841	29.8174	3.19205	0.0077814	0.0851679	101251841	N-(5'-phosphoribosyl)anthranilate isomerase 1, chloroplastic isoform X1
GeneID:101265322	14.9487	3.19733	0.00778328	0.0851679	101265322	serine protease SPPA, chloroplastic
GeneID:101260729	31.485	2.93113	0.00789247	0.0855645	101260729	40S ribosomal protein S28-like
GeneID:101268533	9.16729	3.63968	0.00800974	0.0859162	101268533	cytochrome c oxidase assembly protein COX15
GeneID:101248372	150.509	2.36655	0.00806881	0.0861639	101248372	2-alkenal reductase (NADP(+)-dependent)
GeneID:101255847	22.468	3.37905	0.0081338	0.0861639	101255847	putative methylesterase 11, chloroplastic
GeneID:101267525	19.0571	3.89368	0.00845564	0.087798	101267525	3-hydroxyisobutyryl-CoA hydrolase-like protein 4, mitochondrial isoform X1
GeneID:101266976	23.8452	3.36402	0.00902939	0.0916323	101266976	aspartyl protease AED3
GeneID:3950471	70.4107	2.53208	0.00907116	0.0916545	3950471	ribosomal protein L23
GeneID:101252420	58.3637	2.97851	0.00910471	0.0918785	101252420	uncharacterized protein LOC101252420
GeneID:3950392	1611.49	2.29606	0.00943449	0.0932291	3950392	photosystem I P700 apoprotein A2
GeneID:100301924	12.088	3.44901	0.00943488	0.0932291	100301924	L04
GeneID:101268416	57.2529	2.39967	0.00947539	0.0935266	101268416	FAM10 family protein At4g22670 isoform X1
GeneID:101259233	11.7351	4.06216	0.0095989	0.0942285	101259233	psbP domain-containing protein 2, chloroplastic
GeneID:101267686	10.3614	3.69629	0.00974138	0.0946967	101267686	probable serine/threonine-protein kinase PBL17
GeneID:101252980	99.303	2.35924	0.00982834	0.0952333	101252980	protein STAY-GREEN LIKE, chloroplastic
GeneID:101260143	8.28323	3.81721	0.0099559	0.0960838	101260143	heat shock protein 90
GeneID:101255745	32.5818	2.83385	0.0101302	0.0970082	101255745	ethanolamine-phosphate cytidylyltransferase
GeneID:16976779	83.7241	2.40946	0.0103053	0.0975164	16976779	ribosomal protein L23
GeneID:544238	74.3227	2.51869	0.010632	0.0993087	544238	GTP cyclohydrolase II / 3,4-dihydroxy-2-butanone-4-phosphate synthase
GeneID:104646595	21.1569	4.00196	0.0107239	0.0999264	104646595	psbQ-like protein 3, chloroplastic

## Sheet: Supplementary table 3
Supplementary table 3. Gene Ontology enrichment analysis of DEGs after SOB02 treatment. Biological process, molecular function and cellular component GO terms, obtained with ShinyGO online tool, for down-regulated DEGs (blue) and up-regulated DEGs (red) (adj-p < 0.1 and log2FC < -1) in SOB02 treated plants compared to the untreated ones.
NCBI GeneID	BaseMean	log2FC	p-value	adj-p	NCBI ID	Functional Annotation
GeneID:101253268	119.938	-5.62677	2.38529e-06	0.00199905	101253268	40S ribosomal protein S10-1	BIOLOGICAL PROCESS for down-regulated DEGs (adj-p < 0.1 and log2FC < -1)
GeneID:101257160	62.335	-6.77961	5.44802e-06	0.00315938	101257160	CBBY-like protein	Enrichment FDR	Genes in list	Total genes	Fold enrichment	Functional Category	Genes
GeneID:101247052	78.515	-5.7007	5.5097e-06	0.00315938	101247052	ATP-dependent Clp protease proteolytic subunit-related protein 4, chloroplastic	4.38823e-06	130	3922	0.698926	Cellular nitrogen compound metabolic process	101267636 101267935 101244120 101250341 101244420 101251038 101250548 544238 101251229 101252640 101256451 101266384 101256647 101266087 101246587 101251641 100301943 101265789 101267667 101261182 101251446 543894 101262183 101259128 101259518 543718 101250978 101251664 101255581 101265535 101260428 101251773 101246135 101255294 101251979 543938 101247918 101247618 101250510 543934 101264429 1012…
GeneID:101248194	50.6435	-7.57183	6.9201e-06	0.00375514	101248194	uncharacterized protein LOC101248194	4.94201e-06	118	3468	0.717461	Protein metabolic process	101252115 101267935 101266760 101244464 101250341 101249862 101244420 101251038 101250454 101251229 101256451 101264176 101266384 101265789 101246882 101261182 101262877 101250670 101252072 101261009 101262796 101256970 101251979 101264008 101268186 101247918 101247618 101254396 100500729 101248688 101250904 101265454 101245776 101257090 101261939 101244106 101265464 101265051 101249287 101250918…
GeneID:101265311	76.2802	-6.4369	7.58266e-06	0.00375514	101265311	sel1-like repeats-containing protein isoform X1	2.86897e-07	128	3652	0.739051	Organic substance biosynthetic process	101267935 101250341 101244420 101251038 101250548 544238 101251229 101252640 101256451 101245612 101266384 101256647 101266087 101251641 100301943 101265789 101261182 101260997 101251446 543894 543718 101250586 101251664 544073 101255581 101255486 101247807 101250008 100322875 101254297 101246135 101247015 101255294 101251979 101247918 101247618 101267315 101258465 101257271 101264434 543831 1012…
GeneID:544041	54.6744	-5.95402	1.54359e-05	0.00622869	544041	DNA-binding protein Pti4	1.66585e-07	132	3757	0.740846	Biosynthetic process	101267935 101250341 101244420 101251038 101250548 544238 101251229 101252640 101256451 101245612 101266384 101256647 101266087 101251641 100301943 101265789 101261182 101260997 101251446 543894 101251452 543718 101250586 101251664 544073 101255581 101255486 101247807 101250008 100322875 101254297 101246135 101247015 101255294 101251979 101247918 101247618 101267315 101258465 101257271 101264434 5…
GeneID:544185	43.929	-7.3606	1.71912e-05	0.00645856	544185		2.54738e-07	126	3559	0.746514	Cellular biosynthetic process	101267935 101250341 101244420 101251038 101250548 544238 101251229 101252640 101256451 101245612 101266384 101256647 101266087 101251641 100301943 101265789 101261182 101260997 101251446 543894 101251452 543718 101250586 101251664 544073 101255581 101255486 101247807 101250008 100322875 101254297 101246135 101247015 101255294 101251979 101247918 101247618 101267315 101258465 101257271 101264434 5…
GeneID:101261182	47.7747	-6.40816	2.04164e-05	0.00705668	101261182	60S ribosomal protein L26-1	3.56314e-09	154	4276	0.759414	Organonitrogen compound metabolic process	101252115 101267935 101266760 101244464 101250341 101249862 101244420 101251038 101250548 101250454 544238 101262668 101251229 101256451 101264176 101266384 101265789 101246882 101261182 101262877 101251446 543894 101262183 101250670 101252072 543718 101261009 101251664 101262796 101247807 101256970 101246135 101255294 101251979 101264008 101268186 101247918 101247618 543934 101258465 101254396 1…
GeneID:544103	64.2678	-6.1927	1.94741e-05	0.00705668	544103	scopoletin glucosyltransferase	2.6974e-07	111	3010	0.777592	Cellular protein metabolic process	101252115 101267935 101266760 101244464 101250341 101249862 101244420 101251038 101250454 101251229 101256451 101264176 101266384 101265789 101246882 101261182 101262877 101250670 101252072 101261009 101262796 101251979 101264008 101268186 101247918 101247618 101254396 100500729 101248688 101250904 101265454 101245776 101257090 101261939 101244106 101265464 101265051 101249287 101250918 101256123…
GeneID:101247936	37.7221	-7.15015	2.47765e-05	0.00771259	101247936	protein TIFY 10b-like	1.29663e-08	93	2184	0.897895	Response to stimulus	101256114 101264242 101250548 101268434 101258203 101265779 101264176 101245612 101243849 544149 544147 101265789 101256539 101262183 101249894 101250005 101268862 101260346 101252882 778224 101251480 101250123 101268581 544040 100736433 100736503 101247936 544270 101244892 100736469 101251320 101254034 101254541 101249621 101250355 101264577 101248349 101252346 543601 101257426 544013 101247779 …
GeneID:101259293	36.1242	-7.09121	3.13473e-05	0.00875714	101259293	uncharacterized protein LOC101259293	9.0857e-07	67	1528	0.924585	Cellular component organization	101255820 101244115 101244805 101265370 101268616 101265779 101254143 101246764 101251242 101265789 101246002 101255365 101253061 101259128 101259518 101259620 101250005 101257849 101249905 101248963 101259142 101257363 101251282 104647326 101264521 101249373 101268581 544040 101257576 101246355 101247836 101259950 101245776 101265944 101251208 101261439 543606 101256123 101256806 101263464 54424…
GeneID:101253061	38.4259	-7.17864	3.55331e-05	0.00889144	101253061	pectin acetylesterase 9	1.43605e-09	83	1728	1.01281	Cellular component organization or biogenesis	101255820 101244115 101244805 101244120 101265370 101268616 101265779 101254143 101256451 101246764 101251242 101265789 101261182 101246002 101255365 101260997 101253061 101259128 101259518 101259620 101250005 101257849 101249905 101248963 101259142 101265535 101257363 101260428 101251282 543938 104647326 101264521 101250510 101249373 101268581 544040 778319 101257576 101246355 101247836 10125995…
GeneID:543522	100.27	-4.56405	3.56462e-05	0.00889144	543522	cytosolic NADP-malic enzyme	4.30517e-06	48	982	1.03068	Organelle organization	101255820 101244115 101244805 101265370 101265779 101246764 101251242 101265789 101246002 101255365 101259128 101259620 101250005 101257849 101249905 101248963 101259142 101257363 101251282 104647326 101249373 101268581 544040 101257576 101246355 101247836 101245776 543606 101256806 544240 101267359 101267068 101264277 101252346 101248833 101268656 101253268 101259798 101260492 101250978 10125864…
GeneID:101255052	39.7202	-7.21193	3.76151e-05	0.00890904	101255052	uncharacterized protein LOC101255052	1.65542e-08	64	1265	1.0668	Organonitrogen compound biosynthetic process	101267935 101250341 101244420 101251038 101250548 544238 101251229 101256451 101261182 101251446 543894 543718 101251664 101247807 101246135 101255294 101251979 101247918 101247618 101258465 101257271 101264434 543831 101254617 101261939 101244106 101250918 543983 101256123 101260673 101252123 101244134 101256642 101268074 101245737 101244464 101244617 101257028 101246764 101266399 101249905 1012…
GeneID:101266345	37.2048	-6.04652	4.4485e-05	0.00891251	101266345	uncharacterized protein LOC101266345	5.62218e-06	42	812	1.09066	Cell communication	101264242 101258203 101265779 101264176 101265789 101256539 101250005 101268862 101252882 544040 101247936 544270 100736469 101254034 101254541 101249621 101250355 101264577 101248349 543601 544013 543567 101256455 100736539 101254517 101254941 101257028 101253446 101251538 101266384 101256240 101250670 543989 101247325 543542 100498663 101261051 101267468 101265700 101259394 101259410 101243968
GeneID:101247523	55.2517	-5.53215	4.26129e-05	0.00891251	101247523	glycosyltransferase family 92 protein RCOM_0530710	5.6341e-06	41	784	1.10271	Response to chemical	101264242 101250548 101268434 101243849 101265789 101262183 101260346 778224 101251480 101250123 100736433 100736503 101247936 544270 101254541 543601 101257426 543567 543981 101261890 101247368 101257028 101266384 100134877 101260797 101265910 543603 101246121 543806 101260331 101260232 101247325 543542 543863 100498663 101244094 101245277 101255124 101252619 101267163 544112
GeneID:101244805	81.9571	-4.7478	4.40185e-05	0.00891251	101244805	GTP-binding protein SAR1A	1.24732e-08	62	1184	1.10417	Cellular response to stimulus	101264242 101250548 101258203 101265779 101264176 101245612 101265789 101256539 101262183 101250005 101268862 101252882 778224 101251480 101250123 101268581 544040 100736433 101247936 544270 101244892 100736469 101251320 101254034 101254541 101249621 101250355 101264577 101248349 101252346 543601 101257426 544013 101247779 543567 543981 101256455 100736539 101258637 101254517 101254941 101268434 …
GeneID:101246209	155.066	-4.24411	3.9678e-05	0.00891251	101246209	eIF-2-alpha kinase GCN2 isoform X1	2.79192e-06	43	816	1.11115	Cellular component biogenesis	101244805 101244120 101265779 101254143 101256451 101246764 101261182 101260997 101259128 101259518 101249905 101259142 101265535 101260428 543938 101250510 544040 778319 101257576 101259950 101265348 101263433 101245776 101256398 101265944 101263464 101267068 101264277 101253343 101263184 101268074 101268656 101260024 101253268 543983 101244115 101259018 101258649 101263017 101268280 778213 1012…
GeneID:101246455	35.0211	-5.95778	5.13605e-05	0.00999236	101246455	omega-amidase, chloroplastic	5.02017e-10	66	1164	1.1956	Small molecule metabolic process	101250341 101244420 101251038 101250548 544238 101262668 101251229 101256451 544250 543890 101251446 101262183 543718 101264109 101250586 101253766 101251664 101247807 101265535 101254297 101246135 101247015 101255294 101251979 543938 543522 101247918 101247618 543934 101258465 100500729 101257271 101264434 543831 543863 101245475 101253007 101246159 101254617 101261939 101266245 101244106 101250…
GeneID:101244311	29.8726	-6.81448	5.68038e-05	0.0105759	101244311	protein ROS1	3.07581e-08	45	738	1.28573	Organic acid metabolic process	101250341 101244420 101251038 101250548 101262668 101251229 544250 101251446 101262183 543718 101250586 101251664 101247807 101254297 101246135 101255294 101251979 543522 101247918 101247618 101258465 101257271 101264434 101245475 101246159 101254617 101261939 101266245 101244106 101250918 543983 101260673 101258115 101254443 543863 101257028 101243849 100134877 544009 101251569 101250008 543831 …
GeneID:101248407	41.7304	-5.57426	6.14907e-05	0.0108055	101248407	phosphoenolpyruvate carboxylase-like	3.07581e-08	45	736	1.28923	Oxoacid metabolic process	101250341 101244420 101251038 101250548 101262668 101251229 544250 101251446 101262183 543718 101250586 101251664 101247807 101254297 101246135 101255294 101251979 543522 101247918 101247618 101258465 101257271 101264434 101245475 101246159 101254617 101261939 101266245 101244106 101250918 543983 101260673 101258115 101254443 543863 101257028 101243849 100134877 544009 101251569 101250008 543831 …
GeneID:101055533	70.0926	-4.66631	6.40422e-05	0.0110752	101055533	Hop-interacting protein THI119	3.07581e-08	44	714	1.29942	Carboxylic acid metabolic process	101250341 101244420 101251038 101250548 101262668 101251229 544250 101251446 101262183 543718 101250586 101251664 101247807 101254297 101246135 101255294 101251979 543522 101247918 101247618 101258465 101257271 101264434 101245475 101246159 101254617 101261939 101266245 101244106 101250918 543983 101260673 101258115 101254443 543863 101257028 101243849 544009 101251569 101250008 543831 101244498 …
GeneID:101265478	39.3427	-7.1921	7.01937e-05	0.0115873	101265478	NAD(P)H-quinone oxidoreductase subunit N, chloroplastic	8.44675e-09	48	771	1.31275	Cellular amide metabolic process	101267935 101250341 101244420 101251038 101250548 101251229 101261182 101251446 543718 101246135 101251979 101247918 101247618 543863 101261939 101244106 101250918 101256123 101256642 101268074 101245737 101244464 101244617 101246764 101266399 101249905 101254082 101246627 101248302 101250510 101263520 101268580 778319 543831 101247403 101263433 101255809 101256398 101244892 543536 101249573 1012…
GeneID:544073	32.7139	-5.84933	7.58933e-05	0.0123412	544073		5.0348e-08	42	673	1.31592	Peptide metabolic process	101267935 101250341 101244420 101251038 101251229 101261182 101251979 101247918 101247618 101261939 101244106 101250918 101256123 101256642 101268074 101245737 101244464 101244617 101246764 101266399 101249905 101254082 101246627 101248302 101250510 101263520 101268580 778319 101247403 101263433 101255809 101256398 101244892 543536 101249573 101267842 101257121 101249702 101262888 101251545 10126…
GeneID:101268045	32.6428	-5.85776	7.79833e-05	0.0123655	101268045	mitochondrial import receptor subunit TOM20 isoform X1	3.07581e-08	41	633	1.36576	Translation	101267935 101250341 101244420 101251038 101251229 101261182 101251979 101247918 101247618 101261939 101244106 101250918 101256123 101256642 101268074 101245737 101244464 101244617 101246764 101266399 101249905 101254082 101246627 101248302 101250510 101263520 101268580 778319 101247403 101263433 101255809 101256398 101244892 101249573 101267842 101257121 101249702 101262888 101251545 101268656 54…
GeneID:100301921	29.4255	-6.78776	8.41515e-05	0.0127338	100301921	PI-phospholipase C PLC3	7.7428e-09	45	685	1.38522	Amide biosynthetic process	101267935 101250341 101244420 101251038 101251229 101261182 543718 101246135 101251979 101247918 101247618 101261939 101244106 101250918 101256123 101256642 101268074 101245737 101244464 101244617 101246764 101266399 101249905 101254082 101246627 101248302 101250510 101263520 101268580 778319 543831 101247403 101263433 101255809 101256398 101244892 543536 101249573 101267842 101257121 101249702 1…
GeneID:101263952	52.7189	-4.85066	8.21562e-05	0.0127338	101263952	splicing factor U2af small subunit B	1.56663e-08	42	636	1.39248	Peptide biosynthetic process	101267935 101250341 101244420 101251038 101251229 101261182 101251979 101247918 101247618 101261939 101244106 101250918 101256123 101256642 101268074 101245737 101244464 101244617 101246764 101266399 101249905 101254082 101246627 101248302 101250510 101263520 101268580 778319 101247403 101263433 101255809 101256398 101244892 543536 101249573 101267842 101257121 101249702 101262888 101251545 10126…
GeneID:101256955	27.8704	-6.7197	8.9079e-05	0.0128292	101256955	40S ribosomal protein S12	2.3185e-06	26	350	1.56639	Cellular amino acid metabolic process	101250341 101244420 101251038 101250548 101262668 101251229 101251664 101247807 101251979 101247918 101247618 101258465 101257271 101264434 101245475 101254617 101261939 101266245 101244106 101250918 543983 101260673 101258115 101254443 101244094 101253226
GeneID:101259798	30.5041	-5.75359	8.84398e-05	0.0128292	101259798	FACT complex subunit SSRP1	1.43404e-06	26	341	1.60773	Vesicle-mediated transport	101244805 101254941 101243742 101265370 101251242 101265789 101250005 101247715 101247318 104647326 101252882 101249373 101243717 544040 101265454 101247141 101254614 101255137 101243746 101264577 101248833 101260888 101264011 101246147 101253934 101259672
GeneID:101255641	26.318	-6.63818	9.36001e-05	0.013074	101255641	uncharacterized protein LOC101255641	2.6974e-07	25	290	1.81776	NcRNA metabolic process	101244120 101250341 101244420 101251038 101251229 101267667 101259128 101250978 101260428 101251773 101251979 101247918 101247618 101250510 778319 101265348 101256398 101261939 101244106 101250918 101253343 101263184 101268074 101259018 101267163
GeneID:101244145	30.0963	-5.73179	9.97768e-05	0.0132569	101244145	uncharacterized protein LOC101244145	5.62218e-06	20	230	1.83357	Ribosome biogenesis	101244120 101246764 101261182 101259128 101249905 101259142 101260428 101250510 778319 101265348 101263433 101256398 101253343 101263184 101268074 101268656 101253268 101259018 101258649 101267163
GeneID:100736540	35.8045	-5.98747	0.000101155	0.0132781	100736540	protein LAX1	5.73045e-06	10	52	4.05501	TRNA aminoacylation for protein translation	101250341 101244420 101251038 101251229 101251979 101247918 101247618 101261939 101244106 101250918
GeneID:101245500	25.6998	-6.59664	0.000105417	0.0136729	101245500	chaperone protein dnaJ C76, chloroplastic
GeneID:101250355	44.9619	-6.29705	0.000113678	0.0144014	101250355	uncharacterized protein LOC101250355	Total genes	1348	28424
GeneID:101248164	31.2846	-5.78497	0.000112523	0.0144014	101248164	F-box protein At5g46170
GeneID:101268808	33.0455	-6.95611	0.000121579	0.0148832	101268808	protein EXORDIUM-like 2	MOLECULAR FUNCTION for down-regulated DEGs (adj-p < 0.1 and log2FC < -1)
GeneID:101260232	26.0772	-6.62238	0.000120183	0.0148832	101260232	histone deacetylase complex subunit SAP18	Enrichment FDR	Genes in list	Total genes	Fold Enrichment	Functional Category	Genes
GeneID:101252192	28.3242	-5.64218	0.000127639	0.0151743	101252192	LL-diaminopimelate aminotransferase, chloroplastic	8.88349e-10	52	813	1.34868	RNA binding	101257295 101252420 101249326 101246587 101246764 101261182 101259518 101250978 101248963 101247918 101248302 101263520 101250123 778319 101249376 101263433 101265253 101261939 101263471 101263952 101264277 101245917 101268074 101261596 101267636 101252524 101251229 101259018 101266384 101267667 101266399 101254082 101246627 101251773 101266125 101252489 101247618 101259271 101244892 101252314 10…
GeneID:101255509	37.7755	-5.42946	0.000128135	0.0151743	101255509	glutaredoxin-C9	0.000181118	9	50	3.79549	Aminoacyl-tRNA ligase activity	101250341 101244420 101251038 101251229 101251979 101247918 101247618 101244106 101250918
GeneID:101258933	27.4778	-6.69429	0.000140458	0.0155295	101258933	cytochrome P450 78A5-like	0.000181118	9	50	3.79549	Ligase activity, forming carbon-oxygen bonds	101250341 101244420 101251038 101251229 101251979 101247918 101247618 101244106 101250918
GeneID:101245840	25.0682	-6.55906	0.000139154	0.0155295	101245840	probable nucleoredoxin 2	0.000447831	26	442	1.24036	Structural constituent of ribosome	101246764 101261182 101249905 101254082 101248302 101250510 101263520 101268580 101255809 101256398 101244892 101249573 101257121 101256642 101251545 101268656 101253268 101244464 101244617 101266399 101246627 778319 101247403 101263433 101267842 101262888
GeneID:101251985	24.7349	-6.53943	0.000141268	0.0155295	101251985	ankyrin repeat domain-containing protein 13A	0.00110893	28	529	1.11609	Structural molecule activity	101246764 101265789 101261182 101246002 101249905 101254082 101248302 101250510 101263520 101268580 101255809 101256398 101244892 101249573 101257121 101256642 101251545 101268656 101253268 101244464 101244617 101266399 101246627 778319 101247403 101263433 101267842 101262888
GeneID:101250443	28.0598	-5.64075	0.000143963	0.0155295	101250443	protein OBERON 4	0.00127449	9	68	2.7908	Identical protein binding	101265789 543563 101260346 101253446 543542 543547 544112 543831 543983
GeneID:101246662	32.9062	-5.22747	0.000139511	0.0155295	101246662	UDP-glucuronic acid decarboxylase 2	0.00239207	11	113	2.05262	MRNA binding	101257295 101252420 101259518 101248302 778319 101265253 101263471 101261596 101252524 101267163 101265514
GeneID:101261052	66.5439	-4.44456	0.000138466	0.0155295	101261052	homeobox protein knotted-1-like 3	0.00242584	14	181	1.63097	Ligase activity	101252115 101250341 101244420 101251038 101251229 543718 101251979 101247918 101247618 543863 101244106 101250918 101262668 543536
GeneID:101248677	30.5162	-5.75384	0.000147483	0.0156003	101248677	calreticulin-3	0.00319687	78	2361	0.696617	Metal ion binding	101255927 101250548 101256237 101264109 543563 101260346 101256386 101264434 543831 101249621 543981 544013 101257295 101244115 101243638 544238 101265486 101245104 101251229 101256451 101243849 101251242 101245215 100134877 101262183 101267684 101252368 101265910 543718 101258933 543603 544009 101246905 101255581 101248963 100322875 101254196 101252387 778302 101256970 101260816 101246055 101251…
GeneID:101261439	52.8835	-4.87857	0.000152395	0.0159648	101261439	probable methyltransferase PMT14	0.00367794	16	242	1.39412	Enzyme binding	101254941 101244464 101265176 101265779 101266087 101250670 101248963 544040 101248688 101260951 101255534 544240 543966 101267359 101245737 101256240
GeneID:101262161	102.63	-4.38264	0.000154705	0.0160525	101262161	O-fucosyltransferase 6-like	0.00440384	78	2399	0.685582	Cation binding	101255927 101250548 101256237 101264109 543563 101260346 101256386 101264434 543831 101249621 543981 544013 101257295 101244115 101243638 544238 101265486 101245104 101251229 101256451 101243849 101251242 101245215 100134877 101262183 101267684 101252368 101265910 543718 101258933 543603 544009 101246905 101255581 101248963 100322875 101254196 101252387 778302 101256970 101260816 101246055 101251…
GeneID:101263711	26.7464	-6.66291	0.000158655	0.0161085	101263711	probable 6-phosphogluconolactonase 4, chloroplastic	0.00471476	3	5	12.6516	Pre-mRNA 3 -splice site binding	101263952 101245917 101252328
GeneID:101248818	38.9978	-5.025	0.00015968	0.0161085	101248818		0.00523023	16	255	1.32305	Ubiquitin-protein transferase activity	101246882 101261009 101249818 101257090 101265464 101265051 101263464 101249890 101262398 101249019 101243851 101261019 101256774 101247325 101255124 543547
GeneID:101246550	34.0625	-5.28419	0.000163766	0.0163369	101246550	uncharacterized protein LOC101246550	0.00573641	10	112	1.88268	Catalytic activity, acting on a tRNA	101250341 101244420 101251038 101251229 101267667 101251979 101247918 101247618 101244106 101250918
GeneID:101245277	27.0332	-5.57806	0.000168115	0.016501	101245277	ABC transporter F family member 3	0.00695713	99	3298	0.632965	Transferase activity	101249862 101250548 101264176 101243849 101267667 101246882 543890 101262877 101260997 543894 101262183 101250670 101251452 101252072 101261009 101246905 101255486 101249818 101268862 101246135 101255294 101264008 101268186 101255792 101264521 101258465 101254396 101244498 101254402 101244094 101253007 101257090 101254617 101251208 101265464 101261439 101265051 101255734 101254034 101263464 10125…
GeneID:101260813	26.2608	-5.53604	0.000171417	0.0166749	101260813	putative transcription elongation factor SPT5 homolog 1	0.00720589	16	267	1.26358	Ubiquitin-like protein transferase activity	101246882 101261009 101249818 101257090 101265464 101265051 101263464 101249890 101262398 101249019 101243851 101261019 101256774 101247325 101255124 543547
GeneID:101262878	51.4809	-4.83367	0.000176065	0.0167567	101262878	THO complex subunit 4A	0.0155529	2	2	21.0861	Phosphoserine phosphatase activity	101264434 101266384
GeneID:101243894	69.6895	-4.68845	0.000178338	0.0167567	101243894	CBL-interacting serine/threonine-protein kinase 1	0.0155529	2	2	21.0861	Glutamine-tRNA ligase activity	101244420 101251979
GeneID:101263219	23.7283	-6.4905	0.000187165	0.0171358	101263219	E3 ubiquitin-protein ligase RHF2A	0.0234918	3	9	7.02868	GDP-dissociation inhibitor activity	101256240 101261051 101259410
GeneID:101258644	75.6271	-4.82293	0.000189926	0.0172437	101258644	uncharacterized protein LOC101258644 isoform X1	0.0244643	14	251	1.17611	Purine nucleoside binding	101265779 101247318 543831 101244805 544238 101258203 101256539 101249052 101257363 101252882 101245772 101264577 101266797 101256455
GeneID:101257426	44.9132	-4.90266	0.000192752	0.0173557	101257426	senescence-associated protein SPA15, chloroplastic	0.0244643	14	249	1.18556	GTP binding	101265779 101247318 543831 101244805 544238 101258203 101256539 101249052 101257363 101252882 101245772 101264577 101266797 101256455
GeneID:544271	41.1901	-7.25569	0.000204885	0.017862	544271	arginase 2 isoform X1	0.0244643	14	253	1.16682	Guanyl nucleotide binding	101265779 101247318 543831 101244805 544238 101258203 101256539 101249052 101257363 101252882 101245772 101264577 101266797 101256455
GeneID:101257502	23.8861	-6.49829	0.000208551	0.017862	101257502	importin subunit alpha-2	0.0244643	14	251	1.17611	Purine ribonucleoside binding	101265779 101247318 543831 101244805 544238 101258203 101256539 101249052 101257363 101252882 101245772 101264577 101266797 101256455
GeneID:101250301	23.7497	-6.47199	0.000207084	0.017862	101250301	uncharacterized protein LOC101250301	0.0244643	14	251	1.17611	Guanyl ribonucleotide binding	101265779 101247318 543831 101244805 544238 101258203 101256539 101249052 101257363 101252882 101245772 101264577 101266797 101256455
GeneID:101252825	22.1122	-6.38923	0.000214771	0.017862	101252825	uncharacterized protein LOC101252825	0.0244643	8	97	1.73906	Ubiquitin protein ligase activity	101246882 101249818 101265464 101249890 101262398 101247325 101263464 543547
GeneID:101246627	58.1514	-5.02079	0.000208721	0.017862	101246627	50S ribosomal protein 6, chloroplastic	0.0244643	8	97	1.73906	Ubiquitin-like protein ligase activity	101246882 101249818 101265464 101249890 101262398 101247325 101263464 543547
GeneID:101264390	62.2832	-4.51873	0.000213229	0.017862	101264390	pollen-specific leucine-rich repeat extensin-like protein 1	0.0247424	10	146	1.44425	Oxidoreductase activity, acting on NAD(P)H	101262362 101250123 101260797 543603 101247812 101268280 101265478 101245803 101267068 101251763
GeneID:101259461	25.3803	-5.49089	0.000217333	0.0179382	101259461	uncharacterized protein LOC101259461	0.0258806	2	3	14.0574	Rab GDP-dissociation inhibitor activity	101261051 101259410
GeneID:101263903	45.3872	-4.64498	0.000219205	0.0179567	101263903	bifunctional nuclease 2	0.0258806	2	3	14.0574	Myo-inositol transmembrane transporter activity	543706 101248490
GeneID:101055524	26.2229	-6.60055	0.000231131	0.0182338	101055524	Hop-interacting protein THI043	0.0258806	2	3	14.0574	Myo-inositol:proton symporter activity	543706 101248490
GeneID:101262497	23.2531	-6.43828	0.000226686	0.0182338	101262497	uncharacterized protein LOC101262497 isoform X3
GeneID:101251207	21.0039	-6.30303	0.000229739	0.0182338	101251207	uncharacterized protein LOC101251207	Total genes	1313	28424
GeneID:101256043	63.6128	-4.384	0.000230966	0.0182338	101256043	ATP-dependent Clp protease proteolytic subunit-related protein 1, chloroplastic
GeneID:101244697	23.6702	-6.45934	0.000243378	0.0182976	101244697	thioredoxin X, chloroplastic	CELLULAR COMPONENT for down-regulated DEGs (adj-p < 0.1 and log2FC < -1)
GeneID:101261075	23.1689	-6.454	0.000239447	0.0182976	101261075	phosphatidylinositol/phosphatidylcholine transfer protein SFH6 isoform X2	Enrichment FDR	Genes in list	Total genes	Fold Enrichment	Functional Category	Genes
GeneID:101265598	21.1736	-6.30935	0.000236587	0.0182976	101265598	ABC transporter F family member 4	9,90167559772508e-53	243	4064	1.29441	Cytoplasm	101256114 101255820 101257502 101244805 101252115 101262956 101252524 101267935 101244710 101254941 101266760 101244464 101265773 101243742 101250341 101247861 101255927 101265370 101244420 101251038 544238 101262362 101262668 101265176 101265779 101251229 101254143 101264176 101262172 101245612 101243851 101243849 101246764 101251242 544250 101265789 101246882 543890 101261182 101262877 10125534…
GeneID:101243641	25.8419	-5.51641	0.000241875	0.0182976	101243641	acyl-coenzyme A oxidase 3, peroxisomal-like isoform X2	7,73612524831564e-27	75	758	2.14197	Cytosol	101257502 101254941 101265773 101243742 101247861 101244420 101251038 101251229 101262172 101243849 101246764 543890 101261182 101266399 101251452 101249905 101264109 101246121 101247807 101250008 101260331 101265535 101254082 101254297 101246135 101247015 101251979 543938 101247918 101248302 101250510 101263520 101250123 101258662 101257271 101268580 778319 101247403 101263433 101255809 10124547…
GeneID:101250160	25.0964	-5.47336	0.00023972	0.0182976	101250160	protein pleiotropic regulatory locus 1	3,6961040907519e-18	111	2055	1.16932	Protein-containing complex	101267636 101257502 101244805 101243742 101250341 101265370 101244420 101248146 101262668 101258203 101265176 101262172 101259018 101256647 101246587 101246764 101265789 101256539 101261182 101246002 101259128 101259518 101250005 101261009 101249905 101246121 101262796 101248963 101247715 101254082 101260428 101246135 104647326 101247918 101248302 101250510 101263520 101249373 101254396 101268580…
GeneID:101263520	33.7719	-5.26987	0.00024365	0.0182976	101263520	60S ribosomal protein L23	9,39887281818599e-14	63	956	1.4266	Chloroplast	101256114 101255820 101262956 101244710 101250341 544238 101254143 544250 543890 101260492 101262183 101250094 101259620 544073 101255486 101268563 100322875 101246627 101253483 543522 101260346 778224 101264434 101257676 101256193 101248407 101253007 101260362 101246159 101244106 101245880 101260673 101260882 101254541 101265784 101247769 101247974 101257426 101259317 101252420 544039 101252524 …
GeneID:101250239	22.9721	-6.44361	0.000251428	0.0185088	101250239	eukaryotic translation initiation factor 5B	9,39887281818599e-14	64	984	1.40801	Plastid	101256114 101255820 101262956 101244710 101250341 544238 101254143 544250 543890 101260492 101262183 101250094 101259620 544073 101255486 101268563 100322875 101246627 101253483 543522 101260346 778224 101264434 101257676 101256193 101248407 101253007 101260362 101246159 101244106 101245880 101260673 101260882 101254541 101265784 101247769 101247974 101257426 101258126 101259317 101252420 544039 …
GeneID:101261802	23.415	-6.46391	0.000255247	0.0186639	101261802	UDP-URONIC ACID TRANSPORTER 1-like	1,21574762444436e-13	42	463	1.96376	Ribonucleoprotein complex	101267636 101248146 101259018 101246587 101246764 101261182 101259128 101259518 101249905 101254082 101260428 101248302 101250510 101263520 101268580 778319 101249376 101247403 101265348 101263433 101255809 101265253 101256398 101244892 101249573 101252328 101267842 101263464 101257121 101263952 101264277 101256642 101253343 101245917 101265098 101263184 101268074 101268656 101245737 101261596 10…
GeneID:101253169	23.4701	-6.4725	0.000257442	0.0186893	101253169	clathrin interactor EPSIN 2	1,24672210457865e-13	118	2634	0.96981	Nucleus	101267636 101252420 101257502 101244464 101249862 101248146 101265779 101252640 101249326 101259018 101253446 101243851 101256647 101266087 101246587 101251641 100301943 101265789 101262877 101246002 101255365 101259128 101259518 101264810 101250978 101255581 101248963 101267697 101259142 101260428 101256774 101265920 101244187 101267315 101248981 101268581 101249376 101245772 101248688 101247836…
GeneID:101265789	26.8393	-5.57334	0.000260002	0.0186893	101265789	protein transport protein SEC13 homolog B	1,68298472454101e-10	54	891	1.31201	Endomembrane system	101257502 101244805 101254941 101243742 101265370 101262769 101251242 101265789 101255347 101246002 101260997 101250005 101250586 101246905 101260926 101247715 101265535 543938 104647326 101252882 101264521 101249373 101243717 544040 101247836 101247141 101254614 101262544 101261439 100750253 101243746 101254541 101244134 101250355 101257124 101248833 101247779 101262491 101266797 101256455 10126…
GeneID:100303774	39.0802	-4.69905	0.000260742	0.0186893	100303774	ubiquitin conjugating enzyme E2	6,13508500659514e-08	20	181	2.39206	Cytosolic ribosome	101246764 101261182 101249905 101254082 101248302 101250510 101263520 101268580 778319 101247403 101263433 101255809 101256398 101244892 101249573 101267842 101257121 101268656 101245737 101253268
GeneID:778212	39.8227	-5.50886	0.00027564	0.019346	778212		1,47449592765892e-07	43	756	1.23131	Organelle membrane	101244805 101243742 101265176 101262769 101265789 101259620 101250586 101246905 101251282 104647326 101252882 101249373 100500729 101243717 101252593 101246355 101262544 101261439 100750253 543606 101253934 101243746 101267068 101254541 101247769 101247974 101266797 101244710 101244994 101251242 101265910 778313 101252577 101264426 101247325 101250221 101248490 101246147 101258973 101266957 54352…
GeneID:101262019	36.4849	-5.36146	0.000277005	0.019346	101262019	uncharacterized protein LOC101262019	4,10031583891222e-07	57	1211	1.01895	Cell periphery	101244995 101247864 101258203 101265779 101251242 101246583 101256539 101262877 101260997 101253061 101250670 101252368 101252072 101257849 101267699 101268862 101252387 778302 101264008 101268186 101257479 101243717 101259950 101262033 100736540 101248708 101245882 101249764 101267359 101254541 101250355 101267468 101261383 543706 101259394 101260104 101256838 101258916 101249329 101260024 10126…
GeneID:101257849	21.2919	-6.32061	0.000295031	0.0198417	101257849	protein SPIRAL1-like 1	5,50111133340055e-07	53	1101	1.0421	Non-membrane-bounded organelle	101244115 101267935 101259018 101246764 101261182 101255365 101259128 101257849 101249905 101259142 101254082 101260428 101248302 101250510 101263520 101258662 101268581 101268580 778319 101257576 101245772 101247403 101263433 101255809 101256398 101244892 101259186 101249573 101267842 101256806 101267359 101257121 101264277 101256642 101253343 101265098 101263184 101268074 101268656 101245737 10…
GeneID:101255726	20.0423	-6.2427	0.000288748	0.0198417	101255726	uncharacterized protein LOC101255726	5,50111133340055e-07	53	1101	1.0421	Intracellular non-membrane-bounded organelle	101244115 101267935 101259018 101246764 101261182 101255365 101259128 101257849 101249905 101259142 101254082 101260428 101248302 101250510 101263520 101258662 101268581 101268580 778319 101257576 101245772 101247403 101263433 101255809 101256398 101244892 101259186 101249573 101267842 101256806 101267359 101257121 101264277 101256642 101253343 101265098 101263184 101268074 101268656 101245737 10…
GeneID:101260867	19.7374	-6.21334	0.000294352	0.0198417	101260867	EEF1A lysine methyltransferase 4	7,50986487833048e-07	21	236	1.92632	Ribosomal subunit	101246764 101261182 101249905 101254082 101248302 101250510 101263520 101268580 778319 101247403 101263433 101255809 101256398 101244892 101249573 101267842 101257121 101256642 101268656 101245737 101253268
GeneID:101257837	19.8198	-6.22866	0.000306929	0.0203902	101257837	ATP synthase I-like protein	1,52933486250694e-06	19	204	2.01625	Chloroplast stroma	101256114 101250341 543890 101262183 101260346 101260673 101252420 544039 544238 101263563 101260492 101252850 101257160 101265521 101257271 101245880 101267163 543981 101262888
GeneID:101256825	19.7623	-6.22204	0.000314037	0.020736	101256825	uncharacterized protein LOC101256825	2,83887824594609e-06	19	213	1.93105	Plastid stroma	101256114 101250341 543890 101262183 101260346 101260673 101252420 544039 544238 101263563 101260492 101252850 101257160 101265521 101257271 101245880 101267163 543981 101262888
GeneID:101250904	21.3603	-6.33338	0.000331251	0.0217409	101250904	cyclin-T1-3	3,94592500858482e-06	46	958	1.03947	Plasma membrane	101244995 101247864 101258203 101265779 101251242 101246583 101256539 101262877 101260997 101250670 101252072 101267699 101268862 101252387 101264008 101268186 101257479 101243717 101259950 101262033 100736540 101248708 101245882 101254541 101250355 101267468 101261383 543706 101259394 101260104 101256838 101249329 101260024 101266760 101246014 101265189 101262467 101265219 104647326 101246147 10…
GeneID:101255395	40.4969	-4.47014	0.000335733	0.021903	101255395	heat shock protein 90-5, chloroplastic	4,44500155686968e-06	35	633	1.19697	Mitochondrion	101252524 101250341 101244420 101251038 101262668 544250 100134877 543718 101247618 101246827 101264429 101256386 101252593 543863 101246355 101256193 101244498 101244094 101248695 101246159 101244106 543606 101267068 101256642 101262888 101259714 101265514 101251229 101262183 101264426 101250221 101266130 101263130 101257423 101264487
GeneID:101264737	22.5417	-5.3148	0.000338429	0.0219475	101264737	uncharacterized protein LOC101264737	1,1116428996187e-05	25	382	1.41676	Bounding membrane of organelle	101244805 101243742 101265176 101265789 101246905 101251282 104647326 101252882 101249373 100500729 101261439 101253934 101243746 101254541 101247974 101251242 101265910 778313 101252577 101264426 101248490 101246147 543525 101264487 101266797
GeneID:101258347	20.4611	-6.27898	0.000340593	0.0219571	101258347	isoflavone 2'-hydroxylase	1,96102155057289e-05	27	449	1.30178	Ribosome	101246764 101261182 101249905 101254082 101248302 101250510 101263520 101268580 778319 101247403 101263433 101255809 101256398 101244892 101249573 101267842 101257121 101256642 101268656 101245737 101253268 101244464 101244617 101266399 101246627 101262888 101251545
GeneID:101257124	19.5024	-6.20838	0.000345341	0.0221323	101257124	protein trichome birefringence-like 35	1,96102155057289e-05	126	3979	0.685515	Integral component of membrane	101265370 101259620 101243717 101262544 100750253 543525 543706 778218 101264048 101260078 101260171 101260265 101244710 101244994 101252222 101244995 101267457 101252823 101267065 101268616 101247864 101252331 101265176 101245102 101267456 101254143 101264385 101253750 101256549 101251538 101255257 101251242 101246583 101266178 101244333 101255347 101260997 101267201 101249894 101250670 10125009…
GeneID:101246170	23.9039	-5.39968	0.000349212	0.0222495	101246170	AP-4 complex subunit epsilon	1,96102155057289e-05	22	319	1.49297	Organelle subcompartment	101254941 101254143 101251242 101260997 544073 101268563 101253483 101264521 101257676 101260362 101261439 101245880 101260024 101252420 101250094 101265521 101263017 104647326 101268280 101247141 101265514 101259317
GeneID:101266759	21.7788	-6.36453	0.000358195	0.0226891	101266759	uncharacterized protein LOC101266759	2,45475970835191e-05	127	4040	0.680523	Intrinsic component of membrane	101244995 101265370 101259620 101267699 101243717 101262544 100750253 543525 543706 101256838 778218 101264048 101260078 101260171 101260265 101244710 101244994 101252222 101267457 101252823 101267065 101268616 101247864 101252331 101265176 101245102 101267456 101254143 101264385 101253750 101256549 101251538 101255257 101251242 101246583 101266178 101244333 101255347 101260997 101267201 10124989…
GeneID:101245880	20.3932	-6.24578	0.000370665	0.0229497	101245880	photosystem II reaction center Psb28 protein	2,98986800252988e-05	29	522	1.20267	Membrane-enclosed lumen	101257502 101259018 101256647 101265789 101255365 101259128 101248963 101259142 101260428 101245772 101263130 101247238 101259186 101256806 101256642 101253343 101265098 101263184 101264702 101268074 101260265 101259798 101260232 101266130 101244498 101243936 101257423 101252346 543547
GeneID:101256675	19.5294	-6.2009	0.000382835	0.0229497	101256675	myb-like protein X	2,98986800252988e-05	29	522	1.20267	Organelle lumen	101257502 101259018 101256647 101265789 101255365 101259128 101248963 101259142 101260428 101245772 101263130 101247238 101259186 101256806 101256642 101253343 101265098 101263184 101264702 101268074 101260265 101259798 101260232 101266130 101244498 101243936 101257423 101252346 543547
GeneID:101260078	18.3861	-6.11128	0.000378376	0.0229497	101260078	probable aquaporin SIP2-1	2,98986800252988e-05	29	522	1.20267	Intracellular organelle lumen	101257502 101259018 101256647 101265789 101255365 101259128 101248963 101259142 101260428 101245772 101263130 101247238 101259186 101256806 101256642 101253343 101265098 101263184 101264702 101268074 101260265 101259798 101260232 101266130 101244498 101243936 101257423 101252346 543547
GeneID:101244151	23.6577	-5.38358	0.000383226	0.0229497	101244151	urease accessory protein G-like isoform X1	3,97172749595616e-05	25	419	1.29165	Organelle envelope	101257502 101265789 101246002 101259620 101255486 101252593 101246355 101247836 543606 101267068 101247769 101247974 544039 101244710 101263162 101257160 100322875 101264426 101250221 101257271 101266130 101258973 101247086 101262888 101264487
GeneID:101265486	27.9029	-4.98954	0.000383372	0.0229497	101265486	SWI/SNF complex subunit SWI3D	3,97172749595616e-05	25	419	1.29165	Envelope	101257502 101265789 101246002 101259620 101255486 101252593 101246355 101247836 543606 101267068 101247769 101247974 544039 101244710 101263162 101257160 100322875 101264426 101250221 101257271 101266130 101258973 101247086 101262888 101264487
GeneID:101247910	37.2181	-4.62866	0.000365482	0.0229497	101247910	kinesin-like protein KIN-4A isoform X2	4,9184708028311e-05	25	425	1.27342	Nuclear lumen	101257502 101259018 101256647 101265789 101255365 101259128 101248963 101259142 101260428 101245772 101263130 101247238 101259186 101256806 101253343 101265098 101263184 101264702 101268074 101260265 101259798 101260232 101243936 101252346 543547
GeneID:101266797	44.2335	-4.61867	0.000381837	0.0229497	101266797	signal recognition particle receptor subunit alpha	6,91576722218787e-05	9	63	3.09259	Cytosolic small ribosomal subunit	101249905 101254082 101248302 101250510 101256398 101244892 101268656 101245737 101253268
GeneID:101246905	22.4504	-5.30246	0.000387101	0.0230462	101246905	1-phosphatidylinositol-3-phosphate 5-kinase FAB1B-like isoform X1
GeneID:101263763	18.1504	-6.09167	0.00040258	0.0237087	101263763	bromodomain-containing protein 4
GeneID:101244404	23.3427	-5.36207	0.000406914	0.0238351	101244404	TATA-binding protein-associated factor BTAF1 isoform X1	BIOLOGICAL PROCESS for up-regulated DEGs (adj-p < 0.1 and log2FC > 1)
GeneID:101256077	20.9969	-6.27864	0.000421261	0.024156	101256077	ABC transporter G family member 36-like	Enrichment FDR	Genes in list	Total genes	Fold Enrichment	Functional Category	Genes
GeneID:101265253	32.5431	-4.77492	0.000427814	0.0243145	101265253	heterogeneous nuclear ribonucleoprotein 1	0.0362684	22	2958	0.68415	Regulation of biological process	101261066 543695 101266303 101262189 100736548 101254191 101258168 101268413 101251820 101245998 101267688 101251722 101250766 101244846 101263700 101264440 101264233 101246738 544143 100736467 101259896 101257639
GeneID:101260719	17.8091	-6.06564	0.000434376	0.0245209	101260719	PH, RCC1 and FYVE domains-containing protein 1 isoform X1	0.0359085	21	2702	0.714925	Regulation of cellular process	101261066 543695 101266303 101262189 100736548 101254191 101258168 101251820 101245998 101251722 101250766 101244846 101263700 101264440 101264233 101246738 544143 100736467 101259896 101257639 101267688
GeneID:101244314	17.7067	-6.06017	0.000437688	0.0245805	101244314	nuclear poly(A) polymerase 3	0.0392295	17	2074	0.753992	Localization	101261454 101253654 101252551 101262189 543771 544207 101257478 101253706 544143 101250382 101251722 101246728 101264233 101263234 101260176 101244433 101247578
GeneID:101251480	18.6436	-6.13067	0.000443258	0.0247656	101251480	methionine sulfoxide reductase A3	0.0153778	27	3229	0.76917	Biological regulation	101261066 101249217 543695 101252551 101266303 101262189 100736548 101254191 543771 101258168 101268413 101251820 101245998 101262778 101267688 101251722 101250766 101244846 101263700 101264440 101264233 101246738 544143 100736467 101259896 101247578 101257639
GeneID:101261574	135.648	-3.74355	0.000445912	0.0247868	101261574	ribosomal protein L20	0.0225006	19	2184	0.800254	Response to stimulus	101262189 101247803 100736548 101254191 101251820 101264469 101245998 101266300 101267688 101250766 543771 101264440 101258168 101264233 544143 101258480 100736467 101247578 101267090
GeneID:101259124	19.7953	-6.1991	0.000471719	0.0255691	101259124	UBP1-associated protein 2C-like	0.038971	12	1184	0.932301	Cellular response to stimulus	101262189 101247803 100736548 101254191 101245998 101266300 101250766 101264440 544143 101258480 100736467 101267090
GeneID:101259518	18.3407	-6.09263	0.000470773	0.0255691	101259518	luc7-like protein 3	0.0362684	12	1142	0.966589	Response to stress	101247803 101254191 101264469 101266300 101267688 543771 101258168 101264233 544143 101258480 101247578 101267090
GeneID:101251012	22.6591	-5.3112	0.000467524	0.0255691	101251012	nucleoid-associated protein At4g30620, chloroplastic	0.0362684	11	982	1.0304	Organelle organization	101261454 101261066 101244846 101247803 101257478 101258168 101250382 101264275 101267715 101245922 101245031
GeneID:101244402	21.6709	-5.25675	0.00047117	0.0255691	101244402	UBX domain-containing protein	0.038971	7	454	1.4183	Response to abiotic stimulus	101251820 101264469 101267688 543771 101258168 544143 101247578
GeneID:104646903	20.4205	-6.24762	0.000483173	0.0260603	104646903		0.0165948	6	241	2.29013	Developmental process involved in reproduction	101268413 101251820 101267688 101253090 101267715 101264233
GeneID:101266843	18.7989	-6.14634	0.000503014	0.0262972	101266843	small ubiquitin-related modifier 1	0.0339033	5	191	2.40804	Cellular response to oxygen-containing compound	101254191 101245998 101266300 101250766 544143
GeneID:101264258	18.6128	-6.12154	0.000511704	0.0262972	101264258	protein CASC3 isoform X1	0.0362684	4	124	2.96732	Chemical homeostasis	101249217 101252551 543771 101247578
GeneID:101252465	34.9757	-5.3221	0.000511655	0.0262972	101252465	uncharacterized protein LOC101252465	0.0444772	3	68	4.05825	Cellular chemical homeostasis	101249217 543771 101247578
GeneID:100736537	22.0827	-5.2795	0.000511433	0.0262972	100736537	mitogen-activated protein kinase 19	0.0165948	4	81	4.54257	Ion homeostasis	101249217 101252551 543771 101247578
GeneID:101247974	28.4666	-5.00792	0.000492796	0.0262972	101247974	digalactosyldiacylglycerol synthase 1, chloroplastic-like	0.038971	3	60	4.59935	Cellular ion homeostasis	101249217 543771 101247578
GeneID:101252072	34.9848	-4.88695	0.000510333	0.0262972	101252072	leucine-rich repeat receptor-like serine/threonine/tyrosine-protein kinase SOBIR1 precursor	0.0153778	4	74	4.97227	Inorganic ion homeostasis	101249217 101252551 543771 101247578
GeneID:101263019	25.7423	-4.87204	0.000500742	0.0262972	101263019	GLABROUS1 enhancer-binding protein-like	0.0153778	4	74	4.97227	Response to bacterium	101254191 101264469 101264233 544143
GeneID:101244013	50.9165	-4.61781	0.000508971	0.0262972	101244013	probable glutathione S-transferase	0.0362684	3	55	5.01748	Cellular cation homeostasis	101249217 543771 101247578
GeneID:101245783	24.7829	-6.51391	0.000522026	0.0263307	101245783	probable polyribonucleotide nucleotidyltransferase 1, chloroplastic	0.0153778	4	73	5.04039	Cation homeostasis	101249217 101252551 543771 101247578
GeneID:101255351	18.5792	-6.13225	0.000529722	0.0263307	101255351	protein C2-DOMAIN ABA-RELATED 3	0.0153778	4	69	5.33258	Defense response to bacterium	101254191 101264469 101264233 544143
GeneID:101262467	17.436	-6.03639	0.000517916	0.0263307	101262467	membrane-anchored ubiquitin-fold protein 4 isoform X1	0.0344111	3	49	5.63186	Metal ion homeostasis	101252551 543771 101247578
GeneID:101264295	25.2071	-4.83967	0.000534531	0.0263307	101264295	protein SPT2 homolog	0.0153778	4	65	5.66074	Positive regulation of response to stimulus	101254191 101251820 101264233 544143
GeneID:101245320	36.8507	-4.61224	0.000530184	0.0263307	101245320	ribosomal protein S11 family protein	0.0165222	3	31	8.90197	Monovalent inorganic cation homeostasis	101249217 101252551 543771
GeneID:101244333	58.874	-4.01649	0.000542366	0.0264981	101244333	probable inactive receptor kinase At5g67200	0.0443334	2	18	10.2208	Cellular monovalent inorganic cation homeostasis	101249217 543771
GeneID:101249862	24.3574	-4.7837	0.00054774	0.0266412	101249862	probable serine/threonine-protein kinase At1g54610	0.0409135	2	17	10.822	Pollen tube development	101253090 101267715
GeneID:101252831	16.6228	-5.96747	0.000553921	0.0266865	101252831	cactin	0.0153778	3	25	11.0384	Fucose metabolic process	101261701 101267715 101251896
GeneID:101256338	44.2301	-4.39316	0.0005554	0.0266865	101256338	casein kinase II subunit alpha-1	0.038971	2	16	11.4984	Regulation of cellular pH	101249217 543771
GeneID:101250918	40.4793	-4.27193	0.000556019	0.0266865	101250918	valine--tRNA ligase, mitochondrial 1	0.038971	2	16	11.4984	Regulation of intracellular pH	101249217 543771
GeneID:101244365	23.1206	-6.43354	0.000563444	0.0266901	101244365	GDSL-motif esterase/acyltransferase/lipase precursor	0.0339033	2	11	16.7249	Embryo sac development	101253090 101267715
GeneID:544250	20.0584	-5.14696	0.00056107	0.0266901	544250	formate dehydrogenase	0.0165948	2	7	26.282	Potassium ion homeostasis	101252551 543771
GeneID:101266539	72.2506	-3.91694	0.000558773	0.0266901	101266539	beta-carotene isomerase D27, chloroplastic
GeneID:101248695	29.6721	-6.77815	0.000574402	0.0267891	101248695	inducible plastid-lipid associated protein
GeneID:101247087	19.0194	-6.13419	0.00057537	0.0267891	101247087	uncharacterized oxidoreductase At4g09670	Total genes	309	28424
GeneID:101254639	37.2502	-5.41407	0.000570281	0.0267891	101254639	probable pectate lyase 8
GeneID:101265819	81.0512	-3.85499	0.000572756	0.0267891	101265819	endoplasmin homolog
GeneID:101265630	17.1558	-6.01868	0.000586109	0.027173	101265630	adenylate kinase 4	MOLECULAR FUNCTION for up-regulated DEGs (adj-p < 0.1 and log2FC > 1)
GeneID:543989	45.0156	-4.41174	0.00059111	0.0272396	543989	systemin soform 2	Enrichment FDR	Genes in list	Total genes	Fold Enrichment	Functional Category	Genes
GeneID:101252214	20.2215	-6.22874	0.00059675	0.0273176	101252214	uncharacterized protein At2g37660, chloroplastic	0.028452	3	27	10.2208	Actin filament binding	101261066 101250382 101253239
GeneID:101265212	16.8086	-5.99291	0.000608391	0.0275215	101265212	uncharacterized protein LOC101265212	0.028452	3	39	7.07593	Quercetin 3-O-glucosyltransferase activity	101266856 101260093 101261675
GeneID:101260468	16.7349	-5.98476	0.000608781	0.0275215	101260468	beta-amyrin 28-monooxygenase-like	0.028452	3	39	7.07593	Quercetin 7-O-glucosyltransferase activity	101266856 101260093 101261675
GeneID:101267697	20.749	-5.18615	0.000607371	0.0275215	101267697	nudix hydrolase 18, mitochondrial-like	0.0455656	3	52	5.30695	Potassium ion transmembrane transporter activity	101252551 543771 101251722
GeneID:101264170	30.4484	-5.11618	0.000611953	0.0275505	101264170	probable polyamine oxidase 4	0.028452	5	175	2.6282	Anion transmembrane transporter activity	101253654 101252551 543771 544207 101263234
GeneID:101265176	49.4836	-4.01213	0.00061606	0.0276213	101265176	V-type proton ATPase subunit a3	0.028452	25	3298	0.697294	Transferase activity	101263252 101249615 101247803 101250305 101259850 101259548 101244782 101252613 101266856 101258480 101244415 100736467 101260093 101260288 101261675 543715 101244750 101261701 100736548 101249360 101265921 101267715 101251896 101257780 101264440
GeneID:101261793	20.2174	-5.16375	0.000636727	0.0279933	101261793	protein yippee-like
GeneID:101254204	30.476	-5.10022	0.000651642	0.0283535	101254204	patatin-like protein 6
GeneID:544123	1269.93	-3.8038	0.000653211	0.0283535	544123		CELLULAR COMPONENT for up-regulated DEGs (adj-p < 0.1 and log2FC > 1)
GeneID:101265051	49.8693	-4.03206	0.000666209	0.0285762	101265051	ubiquitin-conjugating enzyme E2 10	Enrichment FDR	Genes in list	Total genes	Fold Enrichment	Functional Category	Genes
GeneID:101245614	38.1487	-4.39236	0.000674194	0.0287011	101245614	dynamin-related protein 3A-like isoform X2	1,31124552151864e-06	39	4064	0.88275	Cytoplasm	101261454 101261066 101252120 101249217 101247070 101256231 101266303 101244846 101262189 101247803 101261701 100736548 101249360 101267023 101250305 101267715 778225 101257478 101244782 101253706 544143 101268599 101252613 101245794 101244415 101264469 101245998 101254359 101262778 101250382 101261675 101250039 544104 101253090 543771 101264233 101266059 101256513 101247578
GeneID:100736469	20.0491	-5.13742	0.000677812	0.0287345	100736469	autophagy 8f	0,00194895767310729	24	2634	0.838151	Nucleus	543695 101263252 101249048 100736548 101254191 101263700 101249360 101253090 101258168 101268413 101245283 101267267 101251820 101245998 101259896 101262778 101267688 101261675 101264275 101264233 101246738 101258480 101261662 101245031
GeneID:101258055	16.3697	-5.95433	0.00068704	0.0288462	101258055	heme-binding protein 2	0,0445013145512654	11	984	1.02831	Plastid	101256231 101244846 101267023 101267715 778225 101264469 101254359 101250039 544104 101266059 101247578
GeneID:101257561	25.3163	-5.47744	0.00069267	0.0288462	101257561	uncharacterized protein LOC101257561
GeneID:101249287	19.4902	-5.10383	0.000699048	0.0288462	101249287	26S proteasome non-ATPase regulatory subunit 8 homolog A
GeneID:543806	29.5032	-4.62641	0.000684826	0.0288462	543806
GeneID:543910	27.8362	-4.53345	0.000701137	0.0288462	543910
GeneID:101258916	22.0938	-6.36274	0.0007081	0.0288683	101258916	L-ascorbate oxidase
GeneID:101263404	18.2764	-6.09452	0.000706712	0.0288683	101263404	ER membrane protein complex subunit 10
GeneID:543591	24.2782	-4.79007	0.000710116	0.0288683	543591
GeneID:101253051	17.47	-6.02778	0.000730973	0.0292792	101253051	alpha/beta hydrolase domain-containing protein 17C
GeneID:543525	24.0727	-4.77938	0.000725457	0.0292792	543525	V-type proton ATPase 16 kDa proteolipid subunit
GeneID:101248051	23.9525	-4.75996	0.000728196	0.0292792	101248051	microfibrillar-associated protein 1A-like
GeneID:101262459	22.904	-6.41785	0.000772608	0.0294556	101262459	E3 ubiquitin-protein ligase RMA1H1
GeneID:101265347	16.7301	-5.96946	0.000776024	0.0294556	101265347	putative clathrin assembly protein At5g35200
GeneID:101256271	16.8201	-5.96086	0.000789775	0.0294556	101256271	shikimate O-hydroxycinnamoyltransferase
GeneID:101250276	16.5623	-5.952	0.000747094	0.0294556	101250276	uncharacterized protein LOC101250276
GeneID:101255347	16.3009	-5.94347	0.000785804	0.0294556	101255347	very-long-chain 3-oxoacyl-CoA reductase 1
GeneID:101265114	15.9846	-5.92016	0.00077674	0.0294556	101265114	protein DEHYDRATION-INDUCED 19 homolog 4
GeneID:101253302	15.9132	-5.90971	0.000792151	0.0294556	101253302	60S ribosomal protein L18a-like protein
GeneID:101264502	15.6322	-5.87488	0.000787754	0.0294556	101264502	protein indeterminate-domain 7 isoform X1
GeneID:109121054	15.5651	-5.87102	0.000785323	0.0294556	109121054	protein trichome birefringence-like 8
GeneID:101265189	22.046	-5.28436	0.000786478	0.0294556	101265189	membrane-anchored ubiquitin-fold protein 2
GeneID:101252720	19.0785	-5.07992	0.000756655	0.0294556	101252720	signal peptide peptidase-like 4 isoform X1
GeneID:101264546	18.5859	-5.0335	0.000781121	0.0294556	101264546	chaperone protein DnaJ isoform X2
GeneID:101256152	23.4181	-4.73442	0.000761262	0.0294556	101256152	eukaryotic initiation factor 4A-3
GeneID:101243936	22.7471	-4.69212	0.000780087	0.0294556	101243936	protein RRP6-like 2
GeneID:101247812	76.5426	-3.61937	0.000781378	0.0294556	101247812	NAD(P)H-quinone oxidoreductase subunit M, chloroplastic
GeneID:101259417	15.8921	-5.91248	0.000801069	0.0295801	101259417	binding partner of ACD11 1 isoform X2
GeneID:101266192	25.2706	-5.46511	0.000800108	0.0295801	101266192	vesicle-associated protein 4-1
GeneID:101251320	15.7762	-5.9018	0.000821734	0.0297151	101251320	heat stress transcription factor A-8
GeneID:543863	15.1382	-5.83743	0.000822039	0.0297151	543863
GeneID:101246027	21.4028	-5.22936	0.000823676	0.0297151	101246027	U-box domain-containing protein 32 isoform X1
GeneID:101259410	27.62	-4.53365	0.000814776	0.0297151	101259410	guanosine nucleotide diphosphate dissociation inhibitor 2
GeneID:101247307	19.2008	-5.08698	0.000840172	0.0301108	101247307	ribonuclease TUDOR 1
GeneID:101267609	21.1405	-5.19547	0.000847335	0.0302679	101267609	protein TSS isoform X2
GeneID:101252123	21.2161	-5.21134	0.000853411	0.0302864	101252123	ribose-phosphate pyrophosphokinase 4
GeneID:101251438	37.2933	-4.37162	0.000867735	0.0305954	101251438	uncharacterized protein LOC101251438
GeneID:101262473	18.4016	-6.1212	0.000872879	0.0306775	101262473	probable transcription factor At3g04930
GeneID:101261815	25.1123	-4.81939	0.000883413	0.0308666	101261815	protein STRICTOSIDINE SYNTHASE-LIKE 4 isoform X2
GeneID:101267654	42.3076	-4.11936	0.000883926	0.0308666	101267654	magnesium-dependent phosphatase 1
GeneID:101244617	29.9676	-4.66359	0.000891409	0.0309296	101244617	40S ribosomal protein S24-1
GeneID:101249818	32.3285	-4.42648	0.000894276	0.0309306	101249818	probable E3 ubiquitin-protein ligase RHG1A isoform X1
GeneID:101260492	15.898	-5.88614	0.000902422	0.0311136	101260492	probable inactive shikimate kinase like 1, chloroplastic
GeneID:101252472	16.3847	-5.95843	0.000906215	0.0311381	101252472	PH-like superfamily protein
GeneID:101253231	15.1121	-5.84095	0.000934572	0.0311381	101253231	probable inactive leucine-rich repeat receptor kinase XIAO
GeneID:101245551	14.7725	-5.80535	0.000930486	0.0311381	101245551	importin subunit beta-1-like
GeneID:108281193	23.2432	-5.34004	0.000926897	0.0311381	108281193	(+)-neomenthol dehydrogenase
GeneID:543754	19.9667	-5.12689	0.00092073	0.0311381	543754
GeneID:101254776	21.8973	-4.62626	0.000920225	0.0311381	101254776	uncharacterized protein At5g50100, chloroplastic
GeneID:101265784	147.215	-4.23173	0.000915647	0.0311381	101265784	ferredoxin
GeneID:101246232	649.089	-3.06	0.000926376	0.0311381	101246232	uncharacterized protein LOC101246232
GeneID:101262888	39.9721	-4.74277	0.000940141	0.0312281	101262888	50S ribosomal protein L9, chloroplastic
GeneID:101254297	15.7664	-5.87125	0.000947912	0.0312955	101254297	xanthoxin dehydrogenase isoform X1
GeneID:101266576	21.8122	-4.63251	0.000954903	0.031431	101266576	transcription initiation factor IIB-2 isoform X2
GeneID:101262956	17.6102	-6.01897	0.000958775	0.0314634	101262956	uncharacterized protein LOC101262956
GeneID:101248490	19.9464	-5.11151	0.000966475	0.0315262	101248490	inositol transporter 1
GeneID:101268353	18.3921	-6.11793	0.000984725	0.0317432	101268353	uncharacterized protein LOC101268353
GeneID:101261383	15.2994	-5.83726	0.000984781	0.0317432	101261383	lanC-like protein GCL1
GeneID:101247648	15.0816	-5.82545	0.000976361	0.0317432	101247648	probable methyltransferase PMT2
GeneID:101247836	14.9571	-5.81213	0.000980539	0.0317432	101247836	nuclear pore complex protein NUP1 isoform X2
GeneID:101268830	24.4307	-6.49938	0.00100444	0.0318972	101268830	phospholipase A1-IIgamma
GeneID:543536	22.4814	-5.31092	0.00100933	0.0318972	543536
GeneID:101055503	18.2974	-5.00609	0.00101005	0.0318972	101055503	CBL-interacting protein kinase
GeneID:101249573	21.443	-4.6033	0.00100082	0.0318972	101249573	60S ribosomal protein L19-2-like
GeneID:101261051	25.1959	-4.39078	0.000999321	0.0318972	101261051	guanosine nucleotide diphosphate dissociation inhibitor 2
GeneID:101245904	17.055	-6.01399	0.00102739	0.0321937	101245904	thioredoxin H-type 2
GeneID:101252733	20.1639	-5.14115	0.00102297	0.0321937	101252733	subtilisin-like protease SBT1.9
GeneID:101254175	28.6791	-4.58992	0.00103571	0.0323326	101254175	L-type lectin-domain containing receptor kinase VIII.2
GeneID:101256237	19.3546	-6.1694	0.00104083	0.0323848	101256237	calcium-binding protein CML24
GeneID:101244187	14.8408	-5.79514	0.00104601	0.0323848	101244187	protein OBERON 3
GeneID:101247444	217.906	-3.49251	0.0010463	0.0323848	101247444	uncharacterized protein LOC101247444
GeneID:101267635	20.6581	-6.25973	0.0010859	0.0325023	101267635	receptor-like protein Cf-9 homolog isoform X2
GeneID:101247185	16.2421	-5.92019	0.00108508	0.0325023	101247185	nuclear transport factor 2B
GeneID:101252046	14.067	-5.72952	0.00106042	0.0325023	101252046	40S ribosomal protein S4
GeneID:101266334	21.3766	-5.2207	0.0010665	0.0325023	101266334	two-component response regulator ARR1
GeneID:101263184	21.0005	-5.2105	0.00107541	0.0325023	101263184	ribosome biogenesis regulatory protein homolog
GeneID:101248644	20.2789	-5.14555	0.00107074	0.0325023	101248644	protein PPLZ12
GeneID:101263244	18.4071	-5.02763	0.0010749	0.0325023	101263244	UPF0690 protein C1orf52 homolog
GeneID:101259895	18.3954	-5.01998	0.0010767	0.0325023	101259895	chaperone protein dnaJ 6
GeneID:101254156	18.4422	-5.00682	0.00107774	0.0325023	101254156	transcription initiation factor IIF subunit alpha isoform X1
GeneID:101252276	21.8084	-4.63311	0.00106743	0.0325023	101252276	uncharacterized protein LOC101252276
GeneID:101248255	51.4047	-3.9445	0.00108275	0.0325023	101248255	RHOMBOID-like protein 9, chloroplastic
GeneID:101248698	16.6883	-5.98049	0.00110589	0.0328717	101248698	uncharacterized protein LOC101248698
GeneID:101256056	16.2573	-5.94106	0.00111022	0.0328717	101256056	uncharacterized protein LOC101256056 isoform X1
GeneID:101251347	14.5205	-5.77005	0.00111059	0.0328717	101251347	polypyrimidine tract-binding protein homolog 1 isoform X1
GeneID:101258018	14.0603	-5.73475	0.00111915	0.0328717	101258018	BAG family molecular chaperone regulator 4
GeneID:101259142	13.8559	-5.7064	0.00111649	0.0328717	101259142	ribosome biogenesis protein BRX1 homolog 1
GeneID:101260453	29.9614	-4.3211	0.00110641	0.0328717	101260453	nucleolin
GeneID:101248963	13.7595	-5.69528	0.00112239	0.0328722	101248963	transcription elongation factor SPT4 homolog 2-like isoform X2
GeneID:101262225	19.4411	-6.17412	0.00114173	0.032995	101262225	probably inactive leucine-rich repeat receptor-like protein kinase At5g48380
GeneID:101257036	15.3414	-5.85909	0.0011391	0.032995	101257036	SH3 domain-containing protein 3
GeneID:544064	29.7272	-5.09381	0.00113445	0.032995	544064	nucleolin-like
GeneID:101245886	46.1583	-4.7119	0.00114037	0.032995	101245886	protein ECERIFERUM 26-like
GeneID:101268563	28.647	-4.57314	0.00113726	0.032995	101268563	uncharacterized protein LOC101268563
GeneID:101254949	14.5554	-5.75724	0.00116336	0.0333521	101254949	serine/arginine repetitive matrix protein 1
GeneID:101260988	14.3223	-5.74773	0.00116633	0.0333521	101260988	nuclear transcription factor Y subunit A-7
GeneID:543687	23.6677	-4.72884	0.0011612	0.0333521	543687	translation initiation factor IF-1, chloroplastic
GeneID:101252411	17.9572	-6.07852	0.00118905	0.0334893	101252411	scarecrow-like transcription factor PAT1
GeneID:101244897	16.3602	-5.93117	0.00117889	0.0334893	101244897	linoleate 13S-lipoxygenase 2-1, chloroplastic
GeneID:101264008	15.0747	-5.83489	0.00118867	0.0334893	101264008	probable receptor-like protein kinase At5g59700
GeneID:101268541	14.4868	-5.75432	0.00118328	0.0334893	101268541	uncharacterized protein At2g34460, chloroplastic
GeneID:101251763	20.9376	-5.19606	0.00118957	0.0334893	101251763	diacylglycerol O-acyltransferase 3, cytosolic
GeneID:101259018	26.4531	-4.48106	0.00118225	0.0334893	101259018	KRR1 small subunit processome component
GeneID:101260377	24.6588	-4.36008	0.00120296	0.0337419	101260377	importin beta-like SAD2
GeneID:101260171	41.2828	-3.90104	0.00120773	0.0337419	101260171	RING-H2 finger protein ATL2
GeneID:101250008	16.7708	-5.99124	0.0012475	0.0337704	101250008	acyl carrier protein 2, mitochondrial
GeneID:101265698	16.0009	-5.92077	0.00123717	0.0337704	101265698	putative clathrin assembly protein At4g40080
GeneID:101263044	14.7448	-5.78527	0.00124989	0.0337704	101263044	flowering time control protein FY isoform X1
GeneID:101252261	14.2357	-5.74967	0.00124245	0.0337704	101252261	uncharacterized protein LOC101252261
GeneID:101264106	14.1203	-5.73622	0.00124158	0.0337704	101264106	ADP-ribosylation factor 1-like 2
GeneID:101268348	13.9979	-5.72202	0.00124783	0.0337704	101268348	zinc finger CCCH domain-containing protein 23 isoform X2
GeneID:101251939	13.3415	-5.65112	0.00125554	0.0337704	101251939	protein PGR
GeneID:101255137	18.9129	-5.0705	0.0012361	0.0337704	101255137	casein kinase 1-like protein 10
GeneID:101252689	18.5815	-5.01313	0.00123942	0.0337704	101252689	two-component response regulator ORR26 isoform X1
GeneID:101247528	18.0317	-4.99934	0.0012524	0.0337704	101247528	uncharacterized protein LOC101247528
GeneID:101246694	17.4613	-4.94316	0.00123454	0.0337704	101246694	uncharacterized protein LOC101246694
GeneID:101266087	30.4669	-4.69865	0.00125565	0.0337704	101266087	RNA polymerase I-specific transcription initiation factor RRN3
GeneID:101254941	26.9874	-4.49496	0.00122348	0.0337704	101254941	brefeldin A-inhibited guanine nucleotide-exchange protein 2-like
GeneID:101245685	25.6737	-4.41189	0.00125845	0.0337704	101245685	protein starmaker
GeneID:101267887	79.1805	-3.69711	0.00124712	0.0337704	101267887	exocyst complex component 6
GeneID:101245292	21.8724	-4.64295	0.00126257	0.0337977	101245292	non-lysosomal glucosylceramidase isoform X1
GeneID:101266745	18.1631	-6.0603	0.00126838	0.033857	101266745	bifunctional UDP-glucose 4-epimerase and UDP-xylose 4-epimerase 1
GeneID:101255110	16.5106	-5.94361	0.0012735	0.033857	101255110	LOW QUALITY PROTEIN
GeneID:101248595	13.9287	-5.70866	0.00128573	0.033857	101248595	beta-glucosidase 18-like
GeneID:101258637	19.2099	-5.05825	0.00128466	0.033857	101258637	heat stress transcription factor A-5
GeneID:101267595	17.1935	-4.93063	0.00128654	0.033857	101267595	small acidic protein 1
GeneID:101266805	39.4305	-4.02525	0.00128147	0.033857	101266805	protein ROOT HAIR DEFECTIVE 3 isoform X1
GeneID:101247002	57.7261	-3.78649	0.00128219	0.033857	101247002	polyadenylate-binding protein 1
GeneID:101262486	58.5869	-4.03805	0.00129235	0.0339281	101262486	transcription factor MYB48
GeneID:101255257	16.0161	-5.88698	0.00131289	0.0343662	101255257	phosphoenolpyruvate/phosphate translocator 2, chloroplastic
GeneID:101262592	17.7182	-4.94952	0.00131535	0.0343662	101262592	putative dual specificity protein phosphatase DSP8
GeneID:101253697	22.2037	-4.65751	0.00133108	0.0346941	101253697	serine/threonine-protein kinase MHK
GeneID:101259856	19.0037	-5.06073	0.00134272	0.0349139	101259856	monogalactosyldiacylglycerol synthase 2, chloroplastic
GeneID:101259128	14.3786	-5.73537	0.0013524	0.0349157	101259128	uncharacterized protein LOC101259128
GeneID:101264521	61.7393	-3.90324	0.00134991	0.0349157	101264521	probable methyltransferase PMT26
GeneID:101248778	60.3596	-3.64927	0.00135088	0.0349157	101248778	protein phosphatase 2C 37
GeneID:101256818	28.9457	-4.25644	0.0013708	0.0352612	101256818	carbon catabolite repressor protein 4 homolog 1
GeneID:101250574	52.2529	-3.9808	0.00137226	0.0352612	101250574	40S ribosomal protein SA
GeneID:101251561	17.8851	-4.97698	0.00137791	0.0353232	101251561	uncharacterized protein LOC101251561
GeneID:101263464	13.2678	-5.63003	0.00139076	0.0355688	101263464	pre-mRNA-processing factor 19
GeneID:101265599	45.5194	-4.08349	0.00139896	0.0356948	101265599	pyruvate kinase 2, cytosolic
GeneID:3950424	15.8962	-5.86795	0.00142229	0.035967	3950424	NADH-plastoquinone oxidoreductase subunit 3
GeneID:101256646	14.7786	-5.79208	0.00142614	0.035967	101256646	protein SUPPRESSOR OF K(+) TRANSPORT GROWTH DEFECT 1
GeneID:101265496	14.0266	-5.72764	0.00141524	0.035967	101265496	pentatricopeptide repeat-containing protein At3g29290
GeneID:101264038	13.1039	-5.63016	0.00142439	0.035967	101264038	protein KINESIN LIGHT CHAIN-RELATED 1-like
GeneID:101253229	18.2902	-5.02117	0.00141963	0.035967	101253229	uncharacterized protein LOC101253229
GeneID:101263017	15.6231	-5.85928	0.0014678	0.0363141	101263017	putative UDP-glucuronate
GeneID:101253815	14.4886	-5.76812	0.00146741	0.0363141	101253815	beta-amylase 3, chloroplastic
GeneID:101247147	12.949	-5.60369	0.00145806	0.0363141	101247147	uncharacterized protein LOC101247147
GeneID:101267437	25.7609	-4.8569	0.0014675	0.0363141	101267437	protein PHOTOSYSTEM I ASSEMBLY 2, chloroplastic
GeneID:101245475	23.0492	-4.69069	0.0014699	0.0363141	101245475	4-hydroxyphenylpyruvate dioxygenase
GeneID:101244106	20.2034	-4.50495	0.00146165	0.0363141	101244106	threonine--tRNA ligase, mitochondrial 1-like
GeneID:543547	25.26	-4.38722	0.00146238	0.0363141	543547
GeneID:101262041	31.3732	-4.11167	0.00146136	0.0363141	101262041	uncharacterized protein LOC101262041 isoform X2
GeneID:101254135	14.484	-5.77852	0.00148387	0.0363297	101254135	L-galactose dehydrogenase
GeneID:101267411	14.2129	-5.75148	0.0014774	0.0363297	101267411	ERBB-3 BINDING PROTEIN 1-like isoform X1
GeneID:101268186	16.4666	-4.85973	0.00148372	0.0363297	101268186	pto-interacting protein 1 isoform X1
GeneID:101268862	13.8253	-5.70664	0.00149848	0.0365782	101268862	wall-associated receptor kinase-like 14
GeneID:101261009	13.9011	-5.68026	0.00150073	0.0365782	101261009	uncharacterized protein LOC101261009
GeneID:101254752	16.9191	-4.8798	0.00150608	0.0366268	101254752	ATP-dependent RNA helicase-like protein DB10
GeneID:778213	13.8466	-5.71788	0.00151361	0.0366327	778213
GeneID:101257149	29.2091	-4.29255	0.00151978	0.0366327	101257149	chloroplastic import inner membrane translocase subunit HP30-2-like
GeneID:101267555	137.442	-3.32475	0.0015155	0.0366327	101267555	probable indole-3-pyruvate monooxygenase YUCCA8
GeneID:101263267	20.0124	-4.51184	0.00152716	0.0367293	101263267	protein SENSITIVE TO PROTON RHIZOTOXICITY 1
GeneID:101250978	13.2279	-5.6441	0.00154925	0.0371786	101250978	protein NUCLEAR FUSION DEFECTIVE 2
GeneID:543859	38.8949	-3.99843	0.00156095	0.0373771	543859
GeneID:101249471	16.064	-4.82612	0.00157285	0.0374972	101249471	threonine--tRNA ligase, chloroplastic/mitochondrial 2
GeneID:104649380	19.0289	-6.14765	0.00157761	0.0375142	104649380	inactive protein RESTRICTED TEV MOVEMENT 1-like
GeneID:101248715	14.3055	-5.72463	0.00158045	0.0375142	101248715	beta-amylase 7 isoform X4
GeneID:101261696	12.917	-5.61324	0.00158695	0.0375864	101261696	uncharacterized protein LOC101261696
GeneID:101260217	15.2919	-5.85246	0.00161203	0.0376861	101260217	kinesin-like protein KIN-13B isoform X2
GeneID:101255365	13.9113	-5.69657	0.00160998	0.0376861	101255365	probable histone H2AXb
GeneID:101261461	13.5991	-5.67849	0.00161078	0.0376861	101261461	AAA-ATPase At3g50940-like
GeneID:101257271	13.4016	-5.64496	0.00160512	0.0376861	101257271	anthranilate phosphoribosyltransferase, chloroplastic
GeneID:101252246	18.5011	-5.00554	0.00159949	0.0376861	101252246	oxysterol-binding protein-related protein 1C-like isoform X2
GeneID:101055521	19.1947	-4.43682	0.00160534	0.0376861	101055521	Hop-interacting protein THI034
GeneID:544013	12.8197	-5.57396	0.00163674	0.0381032	544013
GeneID:101268182	15.8292	-4.80238	0.00164189	0.0381415	101268182	probable apyrase 6
GeneID:101247861	13.6	-5.65956	0.00165609	0.0382645	101247861	acyl-CoA-binding domain-containing protein 4
GeneID:101256865	13.4904	-5.63591	0.00166474	0.0382645	101256865	probable E3 ubiquitin-protein ligase RHC2A
GeneID:101254396	12.3315	-5.53351	0.00166427	0.0382645	101254396	N-terminal acetyltransferase B complex catalytic subunit NAA20 isoform X1
GeneID:101255669	20.7572	-4.56872	0.00165938	0.0382645	101255669	uncharacterized protein LOC101255669 isoform X1
GeneID:101254547	51.8785	-4.11946	0.00165935	0.0382645	101254547	protein ZINC INDUCED FACILITATOR 1-like
GeneID:101268273	13.1832	-5.63179	0.0016693	0.0382699	101268273	putative receptor-like protein kinase At4g00960
GeneID:101267684	16.8548	-4.87891	0.001672	0.0382699	101267684	probable protein phosphatase 2C 60
GeneID:101253598	14.9314	-5.79442	0.00170546	0.0384699	101253598	putative wall-associated receptor kinase-like 16
GeneID:101265920	14.5021	-5.76809	0.00170522	0.0384699	101265920	SUPPRESSOR OF GAMMA RESPONSE 1
GeneID:101262801	13.2211	-5.63501	0.00170388	0.0384699	101262801	UPF0235 protein At5g63440 isoform X2
GeneID:544153	17.1418	-4.90659	0.0016959	0.0384699	544153
GeneID:101244304	25.4923	-4.40932	0.0016848	0.0384699	101244304	uncharacterized protein LOC101244304
GeneID:101248073	29.9079	-4.31035	0.00170365	0.0384699	101248073	transcription factor LHW-like
GeneID:101248020	33.7144	-3.98297	0.00170537	0.0384699	101248020	translation initiation factor eIF(iso)4G isoform X1
GeneID:101264242	12.4197	-5.55092	0.00171293	0.0385586	101264242	ETHYLENE INSENSITIVE 3-like 3 protein isoform X2
GeneID:101262176	12.9381	-5.61806	0.00172403	0.0385668	101262176	rho GTPase-activating protein 5
GeneID:101244646	12.2124	-5.51944	0.00175392	0.0385668	101244646
GeneID:543981	43.0308	-5.19815	0.00174802	0.0385668	543981
GeneID:101266305	17.3601	-4.91467	0.00173482	0.0385668	101266305	F-box protein At4g00755
GeneID:101259676	16.4429	-4.859	0.00171737	0.0385668	101259676	delta(8)-fatty-acid desaturase
GeneID:101265521	16.2648	-4.82782	0.00175456	0.0385668	101265521	glutamyl-tRNA reductase-binding protein, chloroplastic
GeneID:101252328	21.2166	-4.58772	0.00175931	0.0385668	101252328	pre-mRNA-splicing factor SLU7
GeneID:543718	19.4987	-4.46535	0.00175617	0.0385668	543718
GeneID:101266248	29.0981	-4.28626	0.00174503	0.0385668	101266248	uncharacterized protein LOC101266248
GeneID:544039	46.2763	-4.10259	0.00175826	0.0385668	544039	ADP-glucose pyrophosphorylase large subunit
GeneID:101256173	39.8768	-4.06118	0.00172451	0.0385668	101256173	60S ribosomal protein L15
GeneID:101267962	104.967	-3.3799	0.00174588	0.0385668	101267962	protein IRX15-LIKE-like
GeneID:101249621	53.5983	-3.79324	0.00179529	0.0392764	101249621	calmodulin 5
GeneID:101250862	31.4008	-4.12312	0.00180177	0.0393257	101250862	protein BUD31 homolog 1
GeneID:101266760	41.645	-3.77813	0.00180476	0.0393257	101266760	uncharacterized protein LOC101266760 isoform X2
GeneID:101266957	12.1607	-5.52168	0.00181303	0.0394271	101266957	vesicle-associated protein 4-1
GeneID:101255835	13.0919	-5.61495	0.00182062	0.0395133	101255835	alkaline/neutral invertase A, mitochondrial
GeneID:101248992	14.8661	-5.80779	0.00182811	0.039597	101248992	uncharacterized protein LOC101248992
GeneID:104647497	14.9056	-5.78122	0.00184498	0.0396514	104647497	uncharacterized protein LOC104647497
GeneID:101257588	17.6718	-4.95311	0.00183488	0.0396514	101257588	pectin acetylesterase 8-like isoform X2
GeneID:101261954	32.2488	-3.9153	0.00184518	0.0396514	101261954	probable acyl-CoA dehydrogenase IBR3 isoform X1
GeneID:101244892	28.2231	-3.9461	0.00185859	0.0397902	101244892	40S ribosomal protein S3-3-like
GeneID:104644837	69.3193	-3.63629	0.00185895	0.0397902	104644837	zinc finger BED domain-containing protein DAYSLEEPER-like isoform X1
GeneID:101250475	12.5671	-5.57584	0.00187602	0.0400769	101250475	uncharacterized protein LOC101250475
GeneID:101246987	6151.55	-2.85444	0.00188587	0.0402085	101246987	proline iminopeptidase
GeneID:101265159	12.7938	-5.59651	0.00189457	0.0403152	101265159	U-box domain-containing protein 4-like
GeneID:101245401	18.6024	-4.3964	0.00189902	0.0403311	101245401	probable transcription factor At5g28040
GeneID:101249011	18.8886	-4.41589	0.00191432	0.0405768	101249011	citrate synthase, mitochondrial
GeneID:101250005	16.5096	-4.87409	0.00192563	0.0407374	101250005	RINT1-like protein MAG2
GeneID:101245971	56.7621	-3.70213	0.00192998	0.0407502	101245971	subtilisin-like protease SBT1.7
GeneID:101266130	13.963	-5.70617	0.00194216	0.0407506	101266130	mitochondrial import inner membrane translocase subunit TIM8
GeneID:101251545	12.9217	-5.61298	0.0019555	0.0407506	101251545	uncharacterized protein LOC101251545
GeneID:543962	68.5613	-5.59406	0.00194794	0.0407506	543962
GeneID:101244115	12.0616	-5.49488	0.00194945	0.0407506	101244115	probable serine/threonine-protein phosphatase 2A regulatory subunit B'' subunit TON2
GeneID:101265910	15.9485	-4.79986	0.00193711	0.0407506	101265910	probable aspartyl aminopeptidase
GeneID:101246744	50.5578	-3.68381	0.00195348	0.0407506	101246744	delta-aminolevulinic acid dehydratase, chloroplastic
GeneID:101244621	15.3474	-4.73992	0.00197488	0.0410617	101244621	histidine biosynthesis bifunctional protein hisIE, chloroplastic
GeneID:104648797	14.1941	-5.71213	0.0019994	0.0412874	104648797
GeneID:101244094	16.1331	-4.80742	0.00200089	0.0412874	101244094	aspartate aminotransferase, mitochondrial
GeneID:543606	36.0321	-3.89372	0.00199997	0.0412874	543606	small zinc finger-like protein
GeneID:101252433	12.1721	-5.52399	0.00202751	0.0415746	101252433	cycloartenol-C-24-methyltransferase 1
GeneID:101248146	33.5396	-3.96748	0.00203389	0.0415746	101248146	pinin
GeneID:101243901	35.0869	-3.84015	0.00202352	0.0415746	101243901	eukaryotic translation initiation factor 2 subunit beta
GeneID:101244710	21.661	-5.21574	0.00204753	0.0416969	101244710	uncharacterized protein LOC101244710
GeneID:101251705	15.5953	-4.75881	0.00206511	0.0417088	101251705	GPN-loop GTPase QQT2
GeneID:101247687	19.8883	-4.48225	0.00207063	0.0417088	101247687	pheophytinase, chloroplastic
GeneID:543890	30.2322	-4.07133	0.00207108	0.0417088	543890
GeneID:101259438	38.2925	-3.53053	0.00206474	0.0417088	101259438	uncharacterized protein LOC101259438
GeneID:101263536	12.895	-5.60744	0.00207645	0.0417307	101263536	G-protein coupled receptor 1 isoform X1
GeneID:101250341	34.8886	-3.83409	0.00207983	0.0417307	101250341	proline--tRNA ligase, chloroplastic/mitochondrial
GeneID:101254402	14.162	-5.69587	0.00208749	0.0418073	101254402	zeatin O-xylosyltransferase
GeneID:101259991	12.2782	-5.52057	0.00210104	0.0418479	101259991	KH domain-containing protein At3g08620
GeneID:101251420	15.3204	-4.75385	0.00210017	0.0418479	101251420	PRKR-interacting protein 1
GeneID:101268616	15.2744	-4.74278	0.00209881	0.0418479	101268616	protein DMP3
GeneID:101267315	11.9303	-5.49987	0.00212657	0.0421255	101267315	bZIP transcription factor 53
GeneID:101262545	28.1071	-5.00731	0.00212411	0.0421255	101262545	protein NDL2
GeneID:101268656	66.61	-3.36037	0.00213463	0.0422083	101268656	40S ribosomal protein S19-3
GeneID:101268532	12.0861	-5.51423	0.00216402	0.0423541	101268532	uncharacterized protein LOC101268532
GeneID:101259499	11.6235	-5.44336	0.00215259	0.0423541	101259499	uncharacterized protein LOC101259499
GeneID:101265953	25.5318	-4.40992	0.00214663	0.0423541	101265953	FK506-binding protein 5
GeneID:101267847	18.6422	-4.4089	0.00216921	0.0423541	101267847	ER membrane protein complex subunit 2
GeneID:101263439	18.2828	-4.37604	0.00216899	0.0423541	101263439	transcription factor 25
GeneID:101257090	166.643	-3.12399	0.00216623	0.0423541	101257090	ubiquitin-conjugating enzyme E2 10
GeneID:543540	12.3986	-5.52921	0.00217907	0.0423947	543540
GeneID:101267425	12.0976	-5.49575	0.00217624	0.0423947	101267425	chaperone protein dnaJ 11, chloroplastic
GeneID:101255731	13.3315	-5.61666	0.00219344	0.0425204	101255731	probable transmembrane GTPase FZO-like, chloroplastic isoform X1
GeneID:101258802	13.0387	-5.60138	0.00219725	0.0425204	101258802	adenylosuccinate synthetase, chloroplastic
GeneID:543983	16.1214	-5.88851	0.00223028	0.0428231	543983	threonine dehydratase biosynthetic, chloroplastic
GeneID:101253945	12.1771	-5.52889	0.0022261	0.0428231	101253945	elicitor-responsive protein 1
GeneID:101264999	16.8147	-4.8867	0.00222953	0.0428231	101264999	mitochondrial fission 1 protein A
GeneID:101263958	36.5408	-3.7361	0.00221881	0.0428231	101263958	UDP-glucose 6-dehydrogenase 2
GeneID:101267201	11.9222	-5.49004	0.00224074	0.0428927	101267201	purine permease 21 isoform X2
GeneID:100736450	40.9443	-3.60641	0.00224404	0.0428927	100736450	auxin response factor 8-1
GeneID:101254335	13.2707	-5.60197	0.00226013	0.0429538	101254335	ELMO domain-containing protein A isoform X1
GeneID:101265779	29.6465	-4.024	0.00225409	0.0429538	101265779	rac-like GTP-binding protein 5
GeneID:101262466	13.3216	-5.65288	0.00227344	0.0430019	101262466	fructose 1,6-bisphosphate aldolase
GeneID:101254143	16.0922	-4.79373	0.00229621	0.0432077	101254143	protein COFACTOR ASSEMBLY OF COMPLEX C SUBUNIT B CCB3, chloroplastic isoform X1
GeneID:109119311	14.6891	-4.69969	0.00228847	0.0432077	109119311
GeneID:101268306	35.5128	-3.68389	0.00229446	0.0432077	101268306	receptor-like protein Cf-9
GeneID:101255765	15.7174	-5.84761	0.00230673	0.0433307	101255765	uncharacterized protein LOC101255765
GeneID:101256222	12.5729	-5.56831	0.00232191	0.0434203	101256222	V-type proton ATPase subunit e1-like
GeneID:101253766	12.2831	-5.52914	0.00231855	0.0434203	101253766	aldose 1-epimerase
GeneID:101260243	34.4479	-3.55751	0.00232345	0.0434203	101260243	auxilin-related protein 2-like
GeneID:101263390	17.0083	-4.91126	0.00232982	0.0434647	101263390	heterogeneous nuclear ribonucleoprotein 1-like
GeneID:778313	13.7619	-5.65256	0.00234396	0.0435792	778313
GeneID:101248735	14.782	-4.68399	0.00235534	0.0437162	101248735	neutral/alkaline invertase 3, chloroplastic
GeneID:101055532	11.1849	-5.39653	0.00237667	0.0440372	101055532	Hop-interacting protein THI116
GeneID:101254082	49.5369	-3.67544	0.00238247	0.0440696	101254082	40S ribosomal protein S2-3-like
GeneID:101256604	13.1854	-5.64285	0.00242492	0.0443663	101256604	25S rRNA (cytosine-C(5))-methyltransferase nop2
GeneID:101258021	12.7249	-5.59724	0.00243751	0.0443663	101258021	CTP synthase 2 isoform X1
GeneID:101267636	11.4478	-5.42678	0.00243848	0.0443663	101267636	RNA recognition motif (RRM) domain-containg protein
GeneID:101246187	11.4859	-5.4125	0.00244173	0.0443663	101246187	myosin-2-like isoform X2
GeneID:101266398	11.1558	-5.39218	0.00240612	0.0443663	101266398	uncharacterized protein LOC101266398
GeneID:101251229	16.6938	-4.84146	0.00243588	0.0443663	101251229	alanine--tRNA ligase, chloroplastic/mitochondrial isoform X1
GeneID:101268083	22.7342	-4.69599	0.0024433	0.0443663	101268083	huntingtin-interacting protein K
GeneID:544040	14.8765	-4.69353	0.00243363	0.0443663	544040	vacuolar protein sorting-associated protein 41 homolog
GeneID:101262772	40.4921	-3.7405	0.00241609	0.0443663	101262772	homeobox-DDT domain protein RLT1
GeneID:101247006	29.8912	-3.80957	0.00244922	0.0443998	101247006	ribonuclease TUDOR 1
GeneID:101266665	30.001	-4.04854	0.00247116	0.0446488	101266665	N-terminal acetyltransferase B complex auxiliary subunit NAA25
GeneID:101246502	29.3924	-4.03285	0.00247941	0.0447238	101246502	histone deacetylase HDT3
GeneID:101244743	13.3476	-5.66304	0.00251543	0.0452237	101244743	probable calcium-binding protein CML13
GeneID:101253483	13.8895	-5.66166	0.00253214	0.0452259	101253483	uncharacterized protein LOC101253483
GeneID:101268096	12.5938	-5.58231	0.00254876	0.0452259	101268096	tubby-like F-box protein 8
GeneID:101249832	12.1962	-5.49882	0.0025418	0.0452259	101249832	methyl-CpG-binding domain-containing protein 4
GeneID:101250100	11.3614	-5.40461	0.00254758	0.0452259	101250100	vacuolar protein sorting-associated protein 20 homolog 2
GeneID:101255486	16.5888	-4.85648	0.00254777	0.0452259	101255486	CDP-diacylglycerol--glycerol-3-phosphate 3-phosphatidyltransferase 2
GeneID:101246293	14.4857	-4.67846	0.00252948	0.0452259	101246293	probable BOI-related E3 ubiquitin-protein ligase 3
GeneID:544147	29.2309	-4.64418	0.00253389	0.0452259	544147
GeneID:101249420	14.1058	-4.62846	0.00253661	0.0452259	101249420	tyrosine-protein phosphatase DSP1 isoform X2
GeneID:101250673	11.7064	-5.44962	0.00255758	0.0452521	101250673	uncharacterized protein LOC101250673 isoform X2
GeneID:101265098	18.1892	-4.36943	0.00255854	0.0452521	101265098	F-box/WD-40 repeat-containing protein At5g21040
GeneID:101266369	18.6144	-4.99487	0.00256516	0.0452957	101266369	probable bifunctional methylthioribulose-1-phosphate dehydratase/enolase-phosphatase E1 1
GeneID:101247066	19.7776	-4.4792	0.00256978	0.0453038	101247066	Golgi SNAP receptor complex member 1-2
GeneID:101244903	12.203	-5.53355	0.00257428	0.0453099	101244903	U11/U12 small nuclear ribonucleoprotein 59 kDa protein
GeneID:101266147	12.4751	-5.56413	0.00257866	0.0453137	101266147	GSH-induced LITAF domain protein
GeneID:101252650	11.1263	-5.39136	0.00258552	0.045356	101252650	protein MEI2-like 5 isoform X2
GeneID:101254066	19.5689	-4.46818	0.00258939	0.045356	101254066	uncharacterized protein LOC101254066
GeneID:101244359	67.8271	-3.33191	0.0025957	0.0453934	101244359	protein kinase family protein
GeneID:101258354	14.8405	-4.68859	0.00260774	0.0453944	101258354	motile sperm domain-containing protein 2 isoform X1
GeneID:101258649	14.3969	-4.65824	0.00260437	0.0453944	101258649	ribosome maturation protein SBDS
GeneID:101243968	14.208	-4.63638	0.00260825	0.0453944	101243968	diacylglycerol kinase 1-like
GeneID:101256709	35.9623	-3.89626	0.00261391	0.0454203	101256709	protein RETICULATA-RELATED 4, chloroplastic
GeneID:101260608	17.755	-4.32101	0.00263379	0.0456391	101260608	protein PAT1 homolog 2 isoform X2
GeneID:101249941	10.9716	-5.35761	0.00264157	0.0456823	101249941	NAC domain-containing protein 83-like
GeneID:101248316	11.2788	-5.40731	0.00264701	0.0457039	101248316	LOW QUALITY PROTEIN
GeneID:544075	12.712	-5.54483	0.00266152	0.0458818	544075	MADS-box protein SOC1
GeneID:101256468	12.4617	-5.56215	0.00268245	0.045953	101256468	mitochondrial import receptor subunit TOM5 homolog
GeneID:101255926	11.7095	-5.47105	0.00271036	0.045953	101255926	sn1-specific diacylglycerol lipase beta isoform X1
GeneID:101249376	11.5658	-5.44977	0.00272615	0.045953	101249376	U2 small nuclear ribonucleoprotein B''
GeneID:101259317	10.9875	-5.37951	0.00271905	0.045953	101259317	uncharacterized protein LOC101259317
GeneID:101263523	10.9754	-5.3557	0.00269345	0.045953	101263523	uncharacterized protein LOC101263523
GeneID:101257479	10.8722	-5.34555	0.00269512	0.045953	101257479	SNAP25 homologous protein SNAP33
GeneID:100498663	20.3345	-5.11856	0.00272384	0.045953	100498663	auxin response factor 19
GeneID:101257759	15.8445	-4.78645	0.00272892	0.045953	101257759	transcription factor MYB1R1
GeneID:101246665	15.6219	-4.77961	0.00271958	0.045953	101246665	BAG family molecular chaperone regulator 6
GeneID:101257084	14.2226	-4.65138	0.00269691	0.045953	101257084	HD domain-containing protein 2
GeneID:101258126	50.8582	-3.49153	0.00267885	0.045953	101258126	uncharacterized protein LOC101258126
GeneID:101258595	28.973	-4.00957	0.00274092	0.0460838	101258595	translocase of chloroplast 159, chloroplastic
GeneID:101260909	11.5249	-5.40927	0.00275393	0.0462313	101260909	actin-related protein 4
GeneID:101265823	12.0674	-5.48252	0.00277327	0.0463427	101265823	uncharacterized protein LOC101265823
GeneID:101264677	11.3835	-5.39557	0.00279035	0.0463427	101264677	mannan endo-1,4-beta-mannosidase 2
GeneID:3950420	18.4238	-4.97476	0.00278318	0.0463427	3950420	ribosomal protein S2
GeneID:101250274	19.4672	-4.46688	0.00278561	0.0463427	101250274	uncharacterized protein LOC101250274
GeneID:101249239	31.8609	-3.70012	0.00278815	0.0463427	101249239	zinc finger CCCH domain-containing protein 19 isoform X1
GeneID:101251046	74.7892	-3.20124	0.00277207	0.0463427	101251046	ubiquitin-conjugating enzyme E2 variant 1D
GeneID:101249070	15.7113	-4.80207	0.00281073	0.0466102	101249070	uncharacterized WD repeat-containing protein C2A9.03 isoform X1
GeneID:544021	12.8595	-5.56032	0.00286027	0.0466933	544021
GeneID:101263123	11.8388	-5.47384	0.00284576	0.0466933	101263123	BTB/POZ and TAZ domain-containing protein 1-like
GeneID:101248675	11.1813	-5.38326	0.00286277	0.0466933	101248675	DNA-directed RNA polymerases II, IV and V subunit 3
GeneID:101256294	17.7269	-4.96514	0.00283405	0.0466933	101256294	nudC domain-containing protein 2
GeneID:101260346	15.5544	-4.78434	0.00286214	0.0466933	101260346	ferritin-2, chloroplastic
GeneID:101261976	14.2351	-4.63093	0.00285377	0.0466933	101261976	uncharacterized protein LOC101261976
GeneID:101255928	17.0171	-4.25898	0.00284019	0.0466933	101255928	pollen-specific leucine-rich repeat extensin-like protein 3
GeneID:101262475	22.0859	-4.22083	0.00285691	0.0466933	101262475	cysteine-rich PDZ-binding protein
GeneID:101250246	45.9238	-4.10988	0.00285301	0.0466933	101250246	CBS domain-containing protein CBSX3, mitochondrial isoform 1
GeneID:101254846	36.4875	-3.57492	0.00286288	0.0466933	101254846	probable protein phosphatase 2C 10
GeneID:101250488	16.7157	-5.97297	0.00288293	0.04691	101250488	uncharacterized protein LOC101250488
GeneID:101246261	13.2099	-5.61802	0.00289339	0.04691	101246261	uncharacterized protein LOC101246261
GeneID:101264550	12.1004	-5.4891	0.00289331	0.04691	101264550	calcium-binding protein CP1
GeneID:101249865	12.06	-5.46938	0.00288892	0.04691	101249865	photosynthetic NDH subunit of lumenal location 3, chloroplastic
GeneID:101262509	13.0172	-5.60441	0.00291443	0.0471809	101262509	PLAT domain-containing protein 2
GeneID:101243742	10.7959	-5.32759	0.00292595	0.0472271	101243742	trafficking protein particle complex subunit 3-like
GeneID:101251692	55.9072	-3.38666	0.00292561	0.0472271	101251692	wound-induced basic protein
GeneID:101250432	15.8085	-4.80042	0.00293981	0.0473345	101250432	agamous-like MADS-box protein AGL19
GeneID:101260888	20.0839	-4.06339	0.0029413	0.0473345	101260888	exocyst complex component EXO70E2
GeneID:101247480	16.9602	-4.25048	0.0029605	0.0475733	101247480	high mobility group B protein 14 isoform X3
GeneID:101265925	15.0122	-4.70851	0.00296613	0.0475936	101265925	alcohol dehydrogenase 1B
GeneID:104647663	14.9539	-5.77319	0.00297939	0.047596	104647663	putative glycine-rich cell wall structural protein 1
GeneID:101252484	28.7459	-3.75619	0.00297603	0.047596	101252484	THO complex subunit 5A
GeneID:101248708	13.2753	-5.62264	0.00301189	0.047765	101248708	RPM1-interacting protein 4 isoform X1
GeneID:101246996	11.9119	-5.45733	0.00300829	0.047765	101246996	protein TIC 20-v, chloroplastic
GeneID:543934	14.194	-4.61927	0.00300039	0.047765	543934
GeneID:101261842	17.6197	-4.31193	0.00300425	0.047765	101261842	probable inactive purple acid phosphatase 27
GeneID:101252668	13.8068	-4.60773	0.00303792	0.048038	101252668	uncharacterized protein LOC101252668 isoform X1
GeneID:101249326	54.0503	-3.32038	0.00303683	0.048038	101249326	protein RIK isoform X2
GeneID:101249154	11.8161	-5.48259	0.0030455	0.048088	101249154	mediator of RNA polymerase II transcription subunit 6
GeneID:101249491	10.4687	-5.29526	0.00306147	0.0482005	101249491	rho GDP-dissociation inhibitor 1
GeneID:101268280	48.3954	-3.62997	0.0030581	0.0482005	101268280	NAD(P)H-quinone oxidoreductase subunit L, chloroplastic
GeneID:101247067	11.348	-5.3944	0.00307657	0.0482532	101247067	glycine-rich RNA-binding protein 2, mitochondrial
GeneID:101254065	15.1706	-4.7349	0.00308572	0.0482532	101254065	mitochondrial outer membrane protein porin of 34 kDa
GeneID:101248857	39.8045	-3.57679	0.00308219	0.0482532	101248857	phosphoinositide phosphatase SAC2 isoform X1
GeneID:101245776	12.9798	-5.61518	0.00310633	0.048417	101245776	plant UBX domain-containing protein 4
GeneID:101251738	10.6117	-5.30078	0.0031288	0.0486975	101251738	multiple RNA-binding domain-containing protein 1 isoform X1
GeneID:101250123	12.3392	-5.50809	0.00315312	0.048856	101250123	uncharacterized protein LOC101250123
GeneID:101258115	11.372	-5.42581	0.00316364	0.048856	101258115	probable acetyltransferase NATA1-like
GeneID:101267163	24.0891	-5.36365	0.00315999	0.048856	101267163	uncharacterized protein LOC101267163 isoform X1
GeneID:101260275	17.549	-4.31157	0.00316143	0.048856	101260275	COX assembly mitochondrial protein 2 homolog isoform X1
GeneID:101255534	13.0313	-5.6251	0.0031741	0.0489134	101255534	cullin-1
GeneID:543794	18.9045	-5.02817	0.00318196	0.0489653	543794	expansin11 precursor
GeneID:101263820	12.1489	-5.48106	0.0031959	0.0491105	101263820	transformer-2 protein homolog beta isoform X1
GeneID:101247143	11.2074	-5.3997	0.00320679	0.0492084	101247143	YTH domain-containing protein 1 isoform X1
GeneID:101265514	10.4456	-5.27768	0.00322511	0.04942	101265514	pentatricopeptide repeat-containing protein At2g37230
GeneID:101261753	11.0099	-5.37725	0.00328	0.0501904	101261753	mitochondrial adenine nucleotide transporter ADNT1
GeneID:112940064	10.4048	-5.28417	0.00328957	0.0502662	112940064	uncharacterized protein LOC112940064
GeneID:101261751	11.9087	-5.44688	0.00332438	0.0505543	101261751	light-inducible protein CPRF2
GeneID:101261845	10.9377	-5.3642	0.00332152	0.0505543	101261845	uncharacterized protein LOC101261845
GeneID:101262955	14.8194	-4.71107	0.00332698	0.0505543	101262955	long chain acyl-CoA synthetase 1
GeneID:101253343	14.3728	-4.64211	0.00332685	0.0505543	101253343	putative rRNA methyltransferase
GeneID:101262544	21.9845	-4.09504	0.00333585	0.0506186	101262544	ER membrane protein complex subunit 7 homolog
GeneID:101243849	12.7461	-5.5757	0.00335103	0.0507435	101243849	pyrophosphate--fructose 6-phosphate 1-phosphotransferase subunit beta-like
GeneID:101252593	47.0331	-3.48909	0.00335863	0.0507521	101252593	NADH dehydrogenase ubiquinone
GeneID:101245047	10.5641	-5.291	0.0033637	0.0507576	101245047	uncharacterized protein LOC101245047
GeneID:101258982	17.9515	-4.33942	0.00336958	0.0507576	101258982	uncharacterized protein LOC101258982
GeneID:101249702	31.562	-3.91525	0.00337297	0.0507576	101249702	elongation factor 1-gamma 2 isoform X1
GeneID:101268529	16.7334	-4.2449	0.00337869	0.0507736	101268529	ethylene-responsive transcription factor RAP2-10
GeneID:101267842	38.4295	-3.51238	0.0033861	0.0508148	101267842	60S ribosomal protein L18-2
GeneID:101261982	11.2387	-5.39111	0.00342636	0.0508586	101261982	prohibitin-3, mitochondrial
GeneID:101265331	11.2068	-5.38737	0.00342569	0.0508586	101265331	probable galacturonosyltransferase-like 3
GeneID:101246043	10.943	-5.34867	0.00341338	0.0508586	101246043	probable splicing factor 3A subunit 1
GeneID:101255792	10.9183	-5.34309	0.00342354	0.0508586	101255792	crocetin glucosyltransferase, chloroplastic
GeneID:544112	20.6133	-4.56846	0.00341134	0.0508586	544112
GeneID:101258498	23.7877	-4.34198	0.00340835	0.0508586	101258498	uncharacterized protein LOC101258498
GeneID:543623	17.7336	-4.33902	0.00340459	0.0508586	543623	transaldolase
GeneID:101251472	20.4337	-4.07985	0.00343264	0.0508659	101251472	uncharacterized protein At4g28440
GeneID:101260997	35.6938	-3.70914	0.00343867	0.0508659	101260997	cellulose synthase-like protein G2
GeneID:101268580	84.6526	-3.08135	0.00344086	0.0508659	101268580	60S ribosomal protein L27a-3-like
GeneID:100736433	11.9088	-5.44314	0.00344691	0.0508862	100736433	heat shock cognate 70 kDa protein 1
GeneID:101260547	24.6459	-3.7544	0.00345979	0.0510074	101260547	formin-like protein 1
GeneID:101264699	15.3953	-4.76247	0.00346905	0.0510747	101264699	uncharacterized protein LOC101264699
GeneID:101263872	22.0911	-4.65482	0.0034805	0.0511742	101263872	NAC domain-containing protein 90
GeneID:778281	73.4925	-3.3007	0.00348842	0.0512215	778281
GeneID:101247715	16.5125	-4.22759	0.00350454	0.0513889	101247715	vacuolar protein sorting-associated protein 26A isoform 1
GeneID:101256340	11.6913	-5.46333	0.00352299	0.0515207	101256340	probable complex I intermediate-associated protein 30
GeneID:101246184	17.8315	-4.33439	0.00351866	0.0515207	101246184	uncharacterized protein LOC101246184 isoform X1
GeneID:101253934	10.3613	-5.28722	0.0035293	0.0515439	101253934	uncharacterized protein At1g03900
GeneID:101261570	13.0264	-4.50587	0.00355185	0.0518037	101261570	lysine-specific demethylase JMJ25 isoform X1
GeneID:101250548	11.1834	-5.39832	0.00356449	0.0519186	101250548	serine hydroxymethyltransferase 7-like
GeneID:101268163	10.83	-5.36265	0.00357537	0.0519382	101268163	receptor-like serine/threonine-protein kinase At4g25390
GeneID:101256927	10.9287	-5.32697	0.00362716	0.0521344	101256927	transcriptional elongation regulator MINIYO
GeneID:101254309	16.5143	-4.82433	0.00361116	0.0521344	101254309	6-phosphofructo-2-kinase/fructose-2,6-bisphosphatase isoform X1
GeneID:101260265	19.9535	-4.48953	0.00362239	0.0521344	101260265	mediator of RNA polymerase II transcription subunit 33A
GeneID:101253007	22.6257	-3.89221	0.00362339	0.0521344	101253007	solanesyl diphosphate synthase
GeneID:101255407	78.7867	-2.91625	0.00362253	0.0521344	101255407	peptidyl-prolyl cis-trans isomerase CYP19-4
GeneID:101247723	14.852	-5.75791	0.00364068	0.0521459	101247723	CBL-interacting serine/threonine-protein kinase 11
GeneID:101255405	20.7487	-4.10419	0.00364231	0.0521459	101255405	ubiquitin-like domain-containing protein CIP73 isoform X1
GeneID:101244464	20.3004	-4.09637	0.0036635	0.0523804	101244464	ubiquitin-60S ribosomal protein L40
GeneID:543648	11.8419	-5.45501	0.00368532	0.0525746	543648	peptide deformylase 1B, chloroplastic
GeneID:101248775	18.566	-4.37546	0.00368956	0.0525746	101248775	methyl-CpG-binding domain-containing protein 9 isoform X2
GeneID:101245812	28.8052	-3.76782	0.00369156	0.0525746	101245812	branched-chain amino acid aminotransferase 2, chloroplastic-like
GeneID:101254604	54.8376	-3.27724	0.00369704	0.0525839	101254604
GeneID:101247726	18.2995	-4.34973	0.00370199	0.0525857	101247726	PGR5-like protein 1B, chloroplastic
GeneID:101249946	11.302	-5.42632	0.00372119	0.0527896	101249946	phosphoglycerate mutase-like protein AT74
GeneID:101249568	10.5223	-5.32009	0.00374047	0.0528565	101249568	immediate early response 3-interacting protein 1-like
GeneID:101256475	15.8395	-4.80666	0.0037362	0.0528565	101256475	uncharacterized protein LOC101256475
GeneID:101247086	14.1544	-4.62998	0.00374004	0.0528565	101247086	mechanosensitive ion channel protein 2, chloroplastic isoform X2
GeneID:101262798	12.3397	-5.51402	0.00376766	0.0529913	101262798	non-specific lipid-transfer protein 2
GeneID:101262377	11.5463	-5.39415	0.00376946	0.0529913	101262377	uncharacterized protein LOC101262377 isoform X1
GeneID:101262398	15.9875	-4.17474	0.00376256	0.0529913	101262398	probable E3 ubiquitin-protein ligase RHG1A
GeneID:101247368	14.7586	-4.70887	0.00378808	0.0531845	101247368	auxin-induced protein 10A5
GeneID:101253161	12.4678	-5.50889	0.00379818	0.0531891	101253161	phytochrome-associated serine/threonine-protein phosphatase 3
GeneID:101257552	14.2466	-4.65542	0.0037939	0.0531891	101257552	uncharacterized protein LOC101257552
GeneID:101255700	10.691	-5.32542	0.00380812	0.0532599	101255700	protein HESO1-like
GeneID:101267378	11.9745	-5.50038	0.00382788	0.0533991	101267378	F-box protein At5g67140 isoform X1
GeneID:108281121	10.6309	-5.31324	0.00382403	0.0533991	108281121	phospho-N-acetylmuramoyl-pentapeptide-transferase-like protein
GeneID:101258704	12.9404	-4.51025	0.00383961	0.0534943	101258704	transcription factor bHLH121 isoform X2
GeneID:101265700	11.0208	-5.33136	0.00385083	0.0535229	101265700	uncharacterized protein LOC101265700
GeneID:101252667	49.0239	-3.35934	0.00385149	0.0535229	101252667	nascent polypeptide-associated complex subunit alpha-like protein 2
GeneID:101244387	29.5481	-3.58905	0.00385848	0.0535518	101244387	heparan-alpha-glucosaminide N-acetyltransferase-like
GeneID:101256398	33.8675	-3.46409	0.00386666	0.053597	101256398	40S ribosomal protein S8
GeneID:101256647	10.3361	-5.29666	0.00388666	0.0538058	101256647	mediator of RNA polymerase II transcription subunit 21 isoform X1
GeneID:101251367	19.2063	-4.42618	0.00392616	0.0541354	101251367	peroxisome biogenesis protein 3-2
GeneID:101252247	23.2432	-3.95826	0.00392595	0.0541354	101252247
GeneID:101247318	43.9662	-3.76239	0.00393034	0.0541354	101247318	ADP-ribosylation factor 2
GeneID:101259402	17.0439	-4.2877	0.00393624	0.0541481	101259402	ribosome production factor 1
GeneID:101249019	13.7767	-5.65862	0.0039419	0.0541577	101249019	U-box domain-containing protein 33 isoform X1
GeneID:101260797	10.4643	-5.29935	0.0039654	0.0541694	101260797	thioredoxin reductase 2
GeneID:101264864	10.5934	-5.28199	0.00397695	0.0541694	101264864	vesicle-fusing ATPase
GeneID:101249842	10.2748	-5.24904	0.00396841	0.0541694	101249842	(S)-coclaurine N-methyltransferase
GeneID:101262869	10.0701	-5.23408	0.00397756	0.0541694	101262869	chloride channel protein CLC-c-like
GeneID:101267359	22.0896	-3.87291	0.00396975	0.0541694	101267359	cyclase-associated protein 1
GeneID:101266993	30.6265	-3.8658	0.00395632	0.0541694	101266993	uncharacterized protein LOC101266993 isoform X1
GeneID:543632	53.6465	-3.24779	0.00397067	0.0541694	543632	cysteine proteinase inhibitor A
GeneID:101249764	13.5107	-4.54079	0.0039915	0.0542914	101249764	germin-like protein subfamily 1 member 19
GeneID:101248030	10.2262	-5.26132	0.00400954	0.0543466	101248030	signal recognition particle 19 kDa protein
GeneID:101258679	13.5067	-4.54512	0.00401053	0.0543466	101258679	uncharacterized protein LOC101258679 isoform X2
GeneID:101252710	13.0529	-4.49517	0.00400717	0.0543466	101252710	BTB/POZ and MATH domain-containing protein 4-like
GeneID:544149	127.064	-3.29949	0.00402407	0.0544624	544149	acidic 26 kDa endochitinase precursor
GeneID:101264318	13.5183	-4.57879	0.00404507	0.054611	101264318	trafficking protein particle complex subunit 6B
GeneID:101255055	19.8436	-4.05278	0.0040414	0.054611	101255055	uncharacterized protein LOC101255055
GeneID:101256838	13.3049	-5.65266	0.00408892	0.054721	101256838	blue copper protein
GeneID:101252090	10.0371	-5.2212	0.00408994	0.054721	101252090	uncharacterized protein At4g14100
GeneID:101258212	9.66742	-5.17328	0.00407859	0.054721	101258212	ubinuclein-1-like isoform X2
GeneID:101264145	14.1666	-4.60538	0.00407087	0.054721	101264145	pentatricopeptide repeat-containing protein At5g46580, chloroplastic
GeneID:101246014	13.4881	-4.54529	0.00409654	0.054721	101246014	membrane-anchored ubiquitin-fold protein 4
GeneID:101261442	23.9827	-3.713	0.00409025	0.054721	101261442	protein FATTY ACID EXPORT 3, chloroplastic
GeneID:101247817	11610.4	-2.75548	0.00407321	0.054721	101247817	tetratricopeptide repeat protein SKI3
GeneID:101266509	11.1974	-5.36591	0.00411775	0.054743	101266509	uncharacterized protein LOC101266509 isoform X1
GeneID:101252222	9.63058	-5.1807	0.00411112	0.054743	101252222	transducin beta-like protein 2
GeneID:101249120	13.3611	-4.55842	0.00412017	0.054743	101249120	ethylene-overproduction protein 1-like
GeneID:101244038	10.2747	-5.28117	0.00413107	0.0548209	101244038	nucleolar protein 12 domain-containing protein
GeneID:101249429	9.94264	-5.21834	0.00415091	0.0550172	101249429	DNA ligase 6 isoform X1
GeneID:101255410	42.0132	-3.53152	0.00416605	0.0551509	101255410	Dof zinc finger protein 22
GeneID:101253759	15.2122	-5.79985	0.00417374	0.0551855	101253759	MLO-like protein 6 isoform X2
GeneID:101246000	10.2667	-5.26922	0.00418239	0.0552329	101246000	putative H/ACA ribonucleoprotein complex subunit 1-like protein 1
GeneID:101259371	20.3975	-4.10327	0.00420832	0.055374	101259371	U-box domain-containing protein 44-like
GeneID:101243998	32.511	-3.56167	0.00420636	0.055374	101243998	phosphoglycerate mutase family protein
GeneID:101251182	10.734	-5.30198	0.00421729	0.0554251	101251182	LOW QUALITY PROTEIN
GeneID:101248196	28.3021	-3.98769	0.00423118	0.0555406	101248196	probable protein phosphatase 2C 15
GeneID:101261641	13.1133	-5.62254	0.00425183	0.0556775	101261641	EPIDERMAL PATTERNING FACTOR-like protein 2
GeneID:100322875	15.2906	-4.11213	0.00424919	0.0556775	100322875	cytochrome P450-type monooxygenase 97A29
GeneID:101258956	11.2258	-5.4141	0.0043059	0.0562504	101258956	O-fucosyltransferase 1
GeneID:101248269	9.44211	-5.15074	0.00435645	0.0568426	101248269	putative late blight resistance protein homolog R1A-10
GeneID:101257737	14.195	-4.6052	0.00436365	0.0568684	101257737	dnaJ protein ERDJ2A
GeneID:101265221	9.89434	-5.19186	0.00439042	0.0571489	101265221	DDT domain-containing protein DDR4
GeneID:101247015	14.6247	-4.64881	0.00439605	0.0571538	101247015	1,4-dihydroxy-2-naphthoyl-CoA synthase, peroxisomal
GeneID:101266125	12.5179	-4.45044	0.00441938	0.0573888	101266125	protein BTR1 isoform X1
GeneID:543601	26.9388	-4.18654	0.00443893	0.0574957	543601
GeneID:101268581	20.8762	-3.77983	0.00444345	0.0574957	101268581	muscle M-line assembly protein unc-89
GeneID:101253339	10.4036	-5.29602	0.00445766	0.0576111	101253339	uncharacterized protein LOC101253339
GeneID:101267664	10.2264	-5.27726	0.00447626	0.0577684	101267664	serine/threonine-protein phosphatase 6 regulatory ankyrin repeat subunit A
GeneID:101261531	17.9292	-3.90229	0.00448043	0.0577684	101261531	uncharacterized protein LOC101261531
GeneID:101255131	13.6742	-5.68057	0.004497	0.0578906	101255131	E3 ubiquitin-protein ligase ZNF598
GeneID:101256583	10.5918	-5.29409	0.00451364	0.0579868	101256583	carboxypeptidase SOL1 isoform X1
GeneID:101251694	14.1671	-4.60384	0.00451866	0.0579868	101251694	uncharacterized protein LOC101251694
GeneID:101260664	12.7165	-5.58493	0.00456005	0.0579939	101260664	glucan endo-1,3-beta-glucosidase 11-like
GeneID:112941694	11.6683	-5.41805	0.00456168	0.0579939	112941694
GeneID:101264011	9.50899	-5.17053	0.00455209	0.0579939	101264011	protein cornichon homolog 4
GeneID:101245227	12.7796	-4.4907	0.00456179	0.0579939	101245227	nuclear speckle splicing regulatory protein 1
GeneID:101252331	21.95	-4.18933	0.00454783	0.0579939	101252331	protein TIC 21, chloroplastic
GeneID:101260673	43.6524	-3.47568	0.00455335	0.0579939	101260673	coproporphyrinogen-III oxidase 1, chloroplastic
GeneID:101264896	57.3889	-3.21617	0.00453737	0.0579939	101264896	BAG family molecular chaperone regulator 1
GeneID:101246055	18.393	-3.94682	0.00457424	0.0580167	101246055	squamosa promoter-binding-like protein 12
GeneID:101250454	18.2338	-3.93651	0.00457078	0.0580167	101250454	ubiquitin carboxyl-terminal hydrolase 4
GeneID:101259060	15.2688	-4.09441	0.0045922	0.0581092	101259060	uncharacterized protein LOC101259060 isoform X1
GeneID:101245655	22.2038	-3.89109	0.00458878	0.0581092	101245655	putative casein kinase II subunit beta-4 isoform X2
GeneID:101250625	25.5985	-4.09887	0.00461646	0.0583484	101250625	ethylene-responsive transcription factor-like protein At4g13040 isoform X2
GeneID:101256114	21.6357	-3.85259	0.00463314	0.0584914	101256114	2-Cys peroxiredoxin 2
GeneID:104646741	12.9581	-5.5908	0.0046528	0.0586586	104646741	uncharacterized protein LOC104646741
GeneID:101265203	12.9694	-4.49336	0.00465715	0.0586586	101265203	universal stress protein PHOS32
GeneID:101260428	10.8528	-5.31044	0.00467214	0.0587283	101260428	neuroguidin
GeneID:101268063	12.6995	-4.48661	0.00469052	0.0588069	101268063	glutaredoxin-C4
GeneID:101244425	9.98961	-5.20836	0.00472408	0.0589305	101244425	RING-H2 finger protein
GeneID:101245961	9.72821	-5.17819	0.00475926	0.0589305	101245961	uncharacterized protein LOC101245961 isoform X3
GeneID:101266649	9.55249	-5.15276	0.00475931	0.0589305	101266649	xylose isomerase isoform X1
GeneID:101267790	14.3071	-4.65988	0.00475548	0.0589305	101267790	RGS domain-containing serine/threonine-protein kinase A-like isoform X1
GeneID:543938	13.6054	-4.58683	0.00474802	0.0589305	543938	UDP-glucose
GeneID:101267560	15.6078	-4.13205	0.00472416	0.0589305	101267560	E3 ubiquitin-protein ligase KEG
GeneID:101253897	25.3294	-4.08018	0.00475682	0.0589305	101253897	uncharacterized protein LOC101253897
GeneID:101265525	34.2217	-3.67194	0.00471275	0.0589305	101265525	NF-X1-type zinc finger protein NFXL1
GeneID:101257694	36.1861	-3.44268	0.00476201	0.0589305	101257694	CBL-interacting serine/threonine-protein kinase 3
GeneID:101264948	12.656	-4.48445	0.00480343	0.0590013	101264948	uncharacterized protein LOC101264948
GeneID:100500729	11.8854	-4.38171	0.00480892	0.0590013	100500729	alpha-mannosidase precursor
GeneID:101252346	25.3894	-3.82735	0.00480271	0.0590013	101252346	sister chromatid cohesion 1 protein 4 isoform X2
GeneID:101260024	51.249	-3.35462	0.00479832	0.0590013	101260024	cellulose synthase A catalytic subunit 2 UDP-forming
GeneID:101265219	9.5351	-5.13827	0.0048541	0.0593836	101265219	plant intracellular Ras-group-related LRR protein 7
GeneID:101255409	24.3273	-4.78545	0.00485189	0.0593836	101255409	uncharacterized protein LOC101255409
GeneID:101251446	34.42	-3.34832	0.00485643	0.0593836	101251446	neutral ceramidase 1
GeneID:101251641	21.7832	-3.86344	0.00486734	0.0594503	101251641	scarecrow-like protein 15
GeneID:108178985	10.4885	-5.30958	0.00489264	0.0594991	108178985	NAM-like protein
GeneID:101259714	12.7152	-4.47096	0.0049041	0.0594991	101259714	multiple organellar RNA editing factor 8, chloroplastic/mitochondrial
GeneID:101260180	16.7227	-4.22095	0.00488495	0.0594991	101260180	uncharacterized protein LOC101260180
GeneID:101256386	19.9833	-4.05823	0.00490226	0.0594991	101256386	Mn-superoxide dismutase
GeneID:101246764	49.1009	-3.09888	0.00490257	0.0594991	101246764	60S ribosomal protein L11-1
GeneID:101244218	30.8704	-3.37206	0.00493888	0.0598544	101244218	DEAD-box ATP-dependent RNA helicase 37 isoform X1
GeneID:101267667	9.95879	-5.24113	0.00495836	0.0598906	101267667	uncharacterized protein LOC101267667
GeneID:101267890	9.4217	-5.14405	0.00499255	0.0599711	101267890	uncharacterized protein LOC101267890
GeneID:101245357	15.9935	-4.15352	0.00498328	0.0599711	101245357	putative glutamine amidotransferase GAT1_2.1 isoform X1
GeneID:101259007	23.2744	-3.9466	0.00498165	0.0599711	101259007	uncharacterized protein LOC101259007 isoform X1
GeneID:101245104	20.5483	-3.77034	0.00497257	0.0599711	101245104	probable protein phosphatase 2C 46
GeneID:101255071	36.9081	-3.47948	0.00498715	0.0599711	101255071	peptidyl-prolyl cis-trans isomerase NIMA-interacting 4
GeneID:101268775	10.1558	-5.2325	0.00502105	0.0601808	101268775	60S ribosomal protein L11-1
GeneID:101265535	12.3902	-5.49276	0.00503677	0.0602367	101265535	probable UDP-arabinopyranose mutase 5
GeneID:101261451	20.0713	-4.08149	0.00503165	0.0602367	101261451	endo-1,3;1,4-beta-D-glucanase-like
GeneID:543831	9.79236	-5.17755	0.00507868	0.0602748	543831
GeneID:101261851	9.1625	-5.09769	0.0050622	0.0602748	101261851	uncharacterized protein LOC101261851
GeneID:101265944	12.2444	-4.4382	0.00505995	0.0602748	101265944	prefoldin subunit 6
GeneID:101260951	21.3588	-4.18557	0.00507859	0.0602748	101260951	uncharacterized protein LOC101260951
GeneID:101265681	181.831	-3.04849	0.00506094	0.0602748	101265681	stromal 70 kDa heat shock-related protein, chloroplastic
GeneID:101250028	45.2422	-2.9846	0.00505977	0.0602748	101250028	putative G3BP-like protein isoform X1
GeneID:101260892	11.1137	-5.37366	0.00509554	0.060346	101260892	uncharacterized protein LOC101260892
GeneID:101245882	9.14921	-5.08894	0.00511297	0.060353	101245882	magnesium transporter MRS2-I isoform X1
GeneID:101267704	11.9603	-4.39481	0.0051129	0.060353	101267704	uncharacterized protein LOC101267704 isoform X3
GeneID:101257075	43.5337	-3.16267	0.00511153	0.060353	101257075	protein PAT1 homolog 1-like
GeneID:101259221	22.4127	-3.6136	0.00513066	0.0604963	101259221	soluble starch synthase 1, chloroplastic/amyloplastic isoform X2
GeneID:101267936	10.2721	-5.23827	0.00513827	0.0605205	101267936	uncharacterized protein LOC101267936 isoform X2
GeneID:104647881	9.18201	-5.10142	0.00515904	0.0606995	104647881
GeneID:101254443	12.1372	-4.42409	0.00517559	0.0608057	101254443	fumarylacetoacetase
GeneID:101268437	15.8008	-4.16986	0.00517923	0.0608057	101268437	polyadenylate-binding protein 2
GeneID:543795	9.93514	-5.22293	0.00519954	0.0609129	543795	expansin-A1
GeneID:101253793	12.1279	-5.52073	0.00524731	0.0610212	101253793	pollen proteins Ole e I-like precursor
GeneID:101264199	11.1594	-5.39247	0.00522653	0.0610212	101264199	F-box protein At5g07610
GeneID:543734	9.99705	-5.19203	0.00525919	0.0610212	543734
GeneID:101247650	12.423	-4.43619	0.00524836	0.0610212	101247650	receptor-like protein Cf-9 homolog isoform X1
GeneID:101244498	17.4817	-4.34958	0.00523428	0.0610212	101244498	dihydrolipoyllysine-residue acetyltransferase component 2 of pyruvate dehydrogenase complex, mitochondrial-like isoform X1
GeneID:101265348	18.6039	-3.96761	0.00523333	0.0610212	101265348	ribosomal RNA processing protein 1 homolog
GeneID:101266505	55.1445	-3.07746	0.00521692	0.0610212	101266505	ubiquitin-conjugating enzyme E2 variant 1B-like
GeneID:101264584	18.4515	-5.01098	0.00527858	0.0611809	101264584	RING-H2 finger protein ATL8-like
GeneID:101267850	10.7425	-5.34856	0.00528672	0.0612102	101267850	fatty acid amide hydrolase isoform X1
GeneID:101258203	12.4598	-5.51553	0.00532067	0.0614075	101258203	extra-large guanine nucleotide-binding protein 1-like
GeneID:101259906	13.3635	-4.52758	0.00532027	0.0614075	101259906	2-succinylbenzoate--CoA ligase, chloroplastic/peroxisomal
GeneID:101257539	12.4877	-4.4392	0.0053515	0.0615531	101257539	heme oxygenase 1
GeneID:101252388	16.1644	-4.18771	0.00534347	0.0615531	101252388	uncharacterized protein LOC101252388
GeneID:101262369	32.5081	-3.57487	0.00535588	0.0615531	101262369	altered inheritance of mitochondria protein 32
GeneID:101266790	13.0568	-5.56458	0.00544376	0.0618062	101266790	uncharacterized protein LOC101266790
GeneID:101262896	10.5566	-5.3064	0.00554377	0.0618062	101262896	putative E3 ubiquitin-protein ligase SINA-like 6
GeneID:101259090	10.2484	-5.23398	0.00555558	0.0618062	101259090	uncharacterized protein LOC101259090 isoform X1
GeneID:101245860	9.69616	-5.20143	0.00557574	0.0618062	101245860	uncharacterized protein LOC101245860 isoform X2
GeneID:101267367	9.66254	-5.18611	0.00548926	0.0618062	101267367	uncharacterized protein LOC101267367
GeneID:101246140	9.83094	-5.17154	0.00554882	0.0618062	101246140	uncharacterized protein At2g27730, mitochondrial isoform X2
GeneID:101259910	9.48616	-5.13348	0.00542475	0.0618062	101259910	homeobox-leucine zipper protein REVOLUTA
GeneID:101251242	9.26491	-5.10647	0.00550086	0.0618062	101251242	probable phospholipid-transporting ATPase 8
GeneID:101255458	9.19785	-5.09882	0.00550225	0.0618062	101255458	putative glucose-6-phosphate 1-epimerase isoform X1
GeneID:101260234	9.05581	-5.07396	0.00549533	0.0618062	101260234	uncharacterized protein LOC101260234
GeneID:101253946	8.9924	-5.05722	0.00544611	0.0618062	101253946	uncharacterized protein LOC101253946
GeneID:101245102	8.83556	-5.03756	0.00557665	0.0618062	101245102	protein DETOXIFICATION 46, chloroplastic
GeneID:101262760	8.82747	-5.03705	0.0055428	0.0618062	101262760	F-box/kelch-repeat protein At1g30090
GeneID:101259511	13.2465	-4.53166	0.00545226	0.0618062	101259511	magnesium transporter MRS2-I
GeneID:101264176	12.8829	-4.46249	0.00549262	0.0618062	101264176	mitogen-activated protein kinase kinase kinase 5-like isoform X2
GeneID:101247736	12.4313	-4.42335	0.0055878	0.0618062	101247736	PGR5-like protein 1B, chloroplastic
GeneID:101259271	16.8282	-4.27337	0.00539074	0.0618062	101259271	la-related protein 6B isoform X1
GeneID:101259950	16.1504	-4.17986	0.00549905	0.0618062	101259950	uncharacterized protein LOC101259950
GeneID:101251650	15.7353	-4.17284	0.00544333	0.0618062	101251650
GeneID:101255735	15.8949	-4.14292	0.00541162	0.0618062	101255735	COP1-interacting protein 7
GeneID:101253226	14.8114	-4.07146	0.00558447	0.0618062	101253226	imidazoleglycerol-phosphate dehydratase
GeneID:101247120	19.2569	-4.02637	0.00550042	0.0618062	101247120	uncharacterized protein LOC101247120
GeneID:101256692	14.3659	-4.00949	0.00553645	0.0618062	101256692	uncharacterized protein LOC101256692
GeneID:101259309	23.6894	-3.96975	0.00545808	0.0618062	101259309	uncharacterized protein LOC101259309
GeneID:101255434	22.5167	-3.9229	0.00557737	0.0618062	101255434	probable U6 snRNA-associated Sm-like protein LSm4
GeneID:101259186	25.9965	-3.86645	0.00556985	0.0618062	101259186	DNA-directed RNA polymerases II and V subunit 6B
GeneID:101257028	21.8384	-3.85587	0.00558294	0.0618062	101257028	lipase-like PAD4 isoform X1
GeneID:101266968	24.125	-3.71985	0.00555085	0.0618062	101266968	uncharacterized protein LOC101266968
GeneID:101263391	38.0362	-3.25858	0.00544127	0.0618062	101263391	uncharacterized protein LOC101263391
GeneID:101255927	49.2603	-2.95617	0.00542388	0.0618062	101255927	translationally-controlled tumor protein homolog
GeneID:104649391	10.8451	-5.32743	0.00562048	0.0619408	104649391	ABSCISIC ACID-INSENSITIVE 5-like protein 5
GeneID:101251003	16.729	-4.23915	0.00561169	0.0619408	101251003	uncharacterized protein LOC101251003
GeneID:101251028	12.1685	-4.39103	0.00563635	0.0619657	101251028	E3 ubiquitin-protein ligase RHF1A
GeneID:101255809	80.2605	-2.91947	0.00563427	0.0619657	101255809	60S ribosomal protein L27-3
GeneID:101251527	32.2113	-3.76077	0.00565689	0.0620663	101251527	calmodulin-binding protein 25
GeneID:101251334	9.04471	-5.09924	0.00566691	0.0621136	101251334	2-C-methyl-D-erythritol 4-phosphate cytidylyltransferase, chloroplastic isoform X2
GeneID:101254822	11.2838	-5.41887	0.00569301	0.0621877	101254822	IAA-amino acid hydrolase ILR1-like 3
GeneID:101258071	10.8225	-5.30952	0.00569569	0.0621877	101258071	protein phosphatase 2C
GeneID:101254541	9.55061	-5.18521	0.00571932	0.0621877	101254541	peptidyl-prolyl cis-trans isomerase
GeneID:101262769	13.033	-4.51749	0.00571492	0.0621877	101262769	chaperone protein dnaJ 50
GeneID:101247325	14.6868	-4.06678	0.0057064	0.0621877	101247325	E3 ubiquitin-protein ligase SDIR1
GeneID:101250474	31.6827	-3.73286	0.00571077	0.0621877	101250474	aldehyde dehydrogenase family 2 member B7, mitochondrial
GeneID:101250387	760.091	-2.53683	0.00570296	0.0621877	101250387	uncharacterized protein LOC101250387
GeneID:543706	14.9175	-4.67692	0.00575442	0.0623971	543706
GeneID:101248044	13.2617	-4.52629	0.00575576	0.0623971	101248044	RAN GTPase-activating protein 2
GeneID:101257423	10.6168	-5.33346	0.00583098	0.0624153	101257423	mitochondrial acidic protein MAM33
GeneID:101258190	9.87579	-5.18714	0.00582032	0.0624153	101258190	COP9 signalosome complex subunit 7 isoform X3
GeneID:101266842	9.40287	-5.14143	0.00581868	0.0624153	101266842	probable amino acid permease 7 isoform X1
GeneID:101260050	16.2077	-4.80336	0.00583422	0.0624153	101260050	elongator complex protein 1 isoform X1
GeneID:101256806	14.2136	-4.65062	0.0058201	0.0624153	101256806	probable histone H2AXb
GeneID:101245854	12.2551	-4.41856	0.00583487	0.0624153	101245854	probable serine/threonine-protein kinase SIS8 isoform X2
GeneID:101265561	16.1077	-4.20423	0.00583379	0.0624153	101265561	universal stress protein PHOS34
GeneID:101247485	18.1487	-3.90951	0.0057809	0.0624153	101247485	O-fucosyltransferase 38
GeneID:543864	17.4431	-3.85426	0.00583765	0.0624153	543864
GeneID:101247918	20.758	-3.78604	0.00578123	0.0624153	101247918	aspartate--tRNA ligase 2, cytoplasmic
GeneID:101267899	30.6532	-3.47616	0.00581179	0.0624153	101267899	elongin-C
GeneID:101253333	35.7585	-3.27802	0.0057864	0.0624153	101253333	pentatricopeptide repeat-containing protein MRL1, chloroplastic isoform X2
GeneID:101264277	34.9052	-3.24144	0.00578196	0.0624153	101264277	sm-like protein LSM3A
GeneID:101252489	10.6871	-5.3339	0.00585824	0.0625741	101252489	double-stranded RNA-binding protein 2
GeneID:104644301	74.4456	-2.70442	0.00589475	0.0628408	104644301	uncharacterized protein LOC104644301
GeneID:101263714	12.6032	-5.54153	0.00591477	0.0629926	101263714	heavy metal-associated isoprenylated plant protein 7
GeneID:101264428	9.91789	-5.20938	0.00593055	0.063099	101264428	uncharacterized protein LOC101264428
GeneID:101257131	113.989	-3.03896	0.00593705	0.0631065	101257131	HMG1/2-like protein
GeneID:101244445	10.0331	-5.1918	0.00594973	0.0631181	101244445	abscisic acid-insensitive RING protein 4-like
GeneID:101260532	16.2136	-4.17532	0.00596563	0.0631638	101260532	putative HVA22-like protein g
GeneID:101265876	21.3912	-3.81595	0.00599512	0.0634144	101265876	endochitinase A-like
GeneID:101267178	9.86785	-5.16648	0.00601392	0.0634306	101267178	filament-like plant protein 7
GeneID:101258614	13.2857	-4.55619	0.00601412	0.0634306	101258614	uncharacterized protein LOC101258614 isoform X1
GeneID:543603	42.5085	-3.13248	0.00601049	0.0634306	543603	whitefly-induced gp91-phox
GeneID:101256240	14.5379	-4.02755	0.00603738	0.0636077	101256240	rab escort protein 1 isoform X2
GeneID:101266418	9.26643	-5.12863	0.00605884	0.0636558	101266418	protein DETOXIFICATION 29-like
GeneID:101251773	8.66552	-5.02359	0.00605764	0.0636558	101251773	putative tRNA pseudouridine synthase Pus10 isoform X2
GeneID:101258335	15.417	-4.12875	0.00607497	0.0637638	101258335	probable NADH dehydrogenase ubiquinone
GeneID:101256258	21.2703	-3.82032	0.00609776	0.0637894	101256258	ABC transporter D family member 2, chloroplastic isoform X1
GeneID:101262634	34.796	-3.39197	0.00610083	0.0637894	101262634	serine/threonine-protein kinase STY13 isoform X1
GeneID:101252175	38.1107	-3.27143	0.00609841	0.0637894	101252175	ubiquitin carboxyl-terminal hydrolase 17
GeneID:101252314	13.0455	-4.52162	0.00610731	0.0637959	101252314	nucleolar protein 12
GeneID:101262521	9.56162	-5.13154	0.00612617	0.0639024	101262521	pre-mRNA-splicing factor ISY1 homolog
GeneID:101245908	12.3412	-4.41916	0.0061351	0.0639024	101245908	uncharacterized protein LOC101245908 isoform X1
GeneID:101261477	11.4287	-4.32121	0.006132	0.0639024	101261477	exocyst complex component EXO70A1-like
GeneID:101263943	23.2468	-3.97272	0.0061612	0.064001	101263943	coatomer subunit gamma
GeneID:101260822	41.7588	-3.92568	0.00616219	0.064001	101260822	protein transport protein Sec24-like At4g32640 isoform X1
GeneID:101248777	19.3114	-3.66401	0.00617817	0.0640449	101248777	ubiquitin carboxyl-terminal hydrolase 12-like
GeneID:101252224	39.6192	-3.3489	0.00617342	0.0640449	101252224	actin-depolymerizing factor
GeneID:101262221	15.6028	-4.11641	0.00621932	0.0642869	101262221	nucleoside diphosphate kinase 2, chloroplastic
GeneID:101255294	13.792	-3.96318	0.00622512	0.0642869	101255294	quinolinate phoshoribosyltransferase
GeneID:101267468	33.9086	-3.85177	0.00623318	0.0643092	101267468	G-type lectin S-receptor-like serine/threonine-protein kinase LECRK3
GeneID:101262668	11.5163	-5.37556	0.00624074	0.0643263	101262668	methylcrotonoyl-CoA carboxylase beta chain, mitochondrial
GeneID:101244120	11.6986	-4.33222	0.00625009	0.0643617	101244120	uncharacterized protein LOC101244120
GeneID:101245264	46.7905	-3.03008	0.00626579	0.0644625	101245264	60S ribosomal protein L18a
GeneID:101267935	28.3097	-3.53783	0.00633021	0.0649413	101267935	CCR4-NOT transcription complex subunit 1
GeneID:101259981	9.44337	-5.10268	0.00638478	0.0653166	101259981	uncharacterized protein LOC101259981
GeneID:101247954	33.1312	-3.30388	0.00638216	0.0653166	101247954	high mobility group B protein 1 isoform X1
GeneID:101256805	11.1791	-4.29903	0.0064039	0.0654507	101256805	E3 ubiquitin-protein ligase RNF25 isoform X1
GeneID:101252387	11.883	-4.3777	0.00641377	0.0654902	101252387	uncharacterized TPR repeat-containing protein At1g05150-like
GeneID:100736503	9.31074	-5.10096	0.0064456	0.0655214	100736503	temperature-induced lipocalin'
GeneID:101264489	13.4681	-4.56131	0.00645057	0.0655214	101264489	non-specific lipid transfer protein GPI-anchored 2-like
GeneID:101252115	16.8853	-3.81382	0.00644261	0.0655214	101252115	NEDD8-activating enzyme E1 catalytic subunit isoform X2
GeneID:101244352	9.12057	-5.08072	0.00647216	0.0656283	101244352	putative disease resistance RPP13-like protein 1
GeneID:101261540	11.1731	-4.27647	0.00649666	0.0656283	101261540	nucleotide-sugar uncharacterized transporter 3
GeneID:101246305	16.4157	-4.18598	0.00649828	0.0656283	101246305	leucine--tRNA ligase, chloroplastic/mitochondrial isoform X2
GeneID:101256123	15.6377	-4.12912	0.006481	0.0656283	101256123	peptide chain release factor APG3, chloroplastic
GeneID:101257576	30.0027	-3.46293	0.00649958	0.0656283	101257576	fimbrin-2
GeneID:101268300	51.7524	-2.89506	0.00649409	0.0656283	101268300	vacuolar protein sorting-associated protein 32 homolog 2
GeneID:101256514	8.61678	-5.01992	0.00656349	0.066151	101256514	aldo-keto reductase 4B-like
GeneID:101247403	19.3422	-3.68275	0.0065598	0.066151	101247403	60S ribosomal protein L39-3
GeneID:101248706	9.39606	-5.13076	0.0065786	0.0661809	101248706	boron transporter 1 isoform X1
GeneID:101247807	21.6921	-3.57065	0.00657615	0.0661809	101247807	probable low-specificity L-threonine aldolase 1 isoform X1
GeneID:778273	74.5958	-3.83332	0.00660535	0.0663886	778273	phytophthora-inhibited protease 1
GeneID:101248830	11.258	-4.29782	0.00662945	0.0665468	101248830	putative metallophosphoesterase At3g03305 isoform X1
GeneID:101265451	22.0824	-3.60924	0.0066333	0.0665468	101265451	protein STABILIZED1
GeneID:101249064	11.3616	-5.36657	0.0066788	0.0669416	101249064	auxin-responsive protein SAUR72-like
GeneID:544240	12.5473	-5.50048	0.00669358	0.0670281	544240	cyclin A3
GeneID:101267717	8.98473	-5.09389	0.0067335	0.0673041	101267717	uncharacterized protein LOC101267717
GeneID:101252619	11.7596	-4.36855	0.00674482	0.0673555	101252619	probable phytol kinase 3, chloroplastic
GeneID:101260362	10.712	-5.34094	0.00677003	0.0674134	101260362	light-harvesting complex-like protein 3 isotype 1, chloroplastic
GeneID:543534	18.4896	-3.81851	0.00676445	0.0674134	543534	WD-40 repeat-containing protein MSI1
GeneID:101265773	11.1303	-5.35621	0.00682796	0.0676317	101265773	NAD(P)H
GeneID:101261011	9.42289	-5.13469	0.00682835	0.0676317	101261011	uncharacterized protein LOC101261011
GeneID:101267065	15.7196	-4.16395	0.00682529	0.0676317	101267065	protein RARE-COLD-INDUCIBLE 2B-like
GeneID:101247427	14.0057	-3.96822	0.006813	0.0676317	101247427	scarecrow-like protein 13
GeneID:101266119	49.6408	-3.73013	0.006845	0.067735	101266119	MDIS1-interacting receptor like kinase 2-like
GeneID:101249649	46.8683	-3.04083	0.00687692	0.067866	101249649	40S ribosomal protein S18
GeneID:101252784	17.5816	-3.86026	0.00688583	0.0678851	101252784	Golgi apparatus membrane protein-like protein ECHIDNA
GeneID:101264426	17.6648	-3.90372	0.00691674	0.0680059	101264426	mitochondrial import receptor subunit TOM7-1
GeneID:101264431	68.287	-2.93548	0.00692231	0.0680059	101264431	60S ribosomal protein L36-2
GeneID:101251737	11.1303	-4.28542	0.00695525	0.0682409	101251737	probable carboxylesterase SOBER1-like
GeneID:101264577	25.5694	-3.38379	0.00695876	0.0682409	101264577	ras-related protein RABE1c
GeneID:101266194	8.21068	-4.93507	0.00698394	0.06826	101266194	uncharacterized protein LOC101266194 isoform X1
GeneID:101247769	12.1403	-4.42314	0.00699203	0.06826	101247769	uncharacterized protein
GeneID:104647326	11.3282	-4.32497	0.00697714	0.06826	104647326	vesicle transport v-SNARE 12
GeneID:101256539	11.3937	-4.31393	0.00698282	0.06826	101256539	extra-large guanine nucleotide-binding protein 1
GeneID:104644312	8.9107	-5.0854	0.00699836	0.0682607	104644312	peroxisomal and mitochondrial division factor 2
GeneID:101253102	15.1584	-4.08749	0.00701681	0.0683243	101253102	uncharacterized protein LOC101253102
GeneID:101253773	9.56101	-5.1219	0.00706596	0.0687354	101253773	pentatricopeptide repeat-containing protein At4g31850, chloroplastic
GeneID:101254168	9.51091	-5.1309	0.00708337	0.0687819	101254168	SOSS complex subunit B homolog
GeneID:101263433	8.47379	-5.00747	0.00708248	0.0687819	101263433	60S ribosomal protein L14-1-like
GeneID:101253884	8.49941	-4.97302	0.00711229	0.0688169	101253884	zinc finger CCCH domain-containing protein 17
GeneID:100736539	12.4189	-4.45939	0.00710449	0.0688169	100736539	mitogen-activated protein kinase 16
GeneID:101246716	11.5494	-4.34183	0.00713456	0.0689105	101246716	coilin isoform X1
GeneID:101245556	15.1841	-4.1224	0.00714308	0.0689316	101245556	uridine kinase-like protein 1
GeneID:101254807	8.11688	-4.91361	0.00717486	0.069177	101254807	protein FAR1-RELATED SEQUENCE 5
GeneID:101255076	8.53203	-4.97932	0.00720976	0.0694521	101255076	rhodanese-like/PpiC domain-containing protein 12, chloroplastic
GeneID:101247189	11.915	-5.46609	0.00728106	0.0699533	101247189	uncharacterized protein LOC101247189
GeneID:101255233	8.52338	-4.98187	0.00728747	0.0699533	101255233	uncharacterized protein LOC101255233
GeneID:101246246	11.1629	-4.3021	0.00735662	0.0705549	101246246	chaperone protein dnaJ 49
GeneID:101254125	11.5244	-4.34867	0.00736471	0.0705703	101254125	uncharacterized protein LOC101254125
GeneID:101247238	9.66936	-5.19567	0.00750301	0.0713962	101247238	mediator of RNA polymerase II transcription subunit 30
GeneID:101259939	8.92847	-5.02484	0.00750331	0.0713962	101259939	glyoxysomal fatty acid beta-oxidation multifunctional protein MFP-a-like isoform X1
GeneID:101259672	8.51486	-4.98353	0.00750105	0.0713962	101259672	PRA1 family protein D
GeneID:101264731	8.43096	-4.96406	0.00746698	0.0713962	101264731	homeobox-leucine zipper protein ATHB-12
GeneID:101254665	17.7551	-3.87253	0.00749033	0.0713962	101254665	protein kinase superfamily protein
GeneID:100134877	64.068	-2.92419	0.00749424	0.0713962	100134877	sulfite oxidase
GeneID:101246355	8.28475	-4.92778	0.00754122	0.0716943	101246355	outer envelope pore protein 16-4, chloroplastic
GeneID:101254313	9.07598	-5.0818	0.00755365	0.0717498	101254313	protein RRP6-like 3 isoform X1
GeneID:101265871	8.73412	-5.0025	0.00756173	0.071764	101265871	uncharacterized protein LOC101265871
GeneID:101244467	9.78298	-5.14413	0.00760707	0.0719436	101244467
GeneID:101244601	12.5251	-4.4663	0.00760545	0.0719436	101244601	uncharacterized protein LOC101244601
GeneID:101260331	26.3407	-3.65835	0.00760251	0.0719436	101260331	S-formylglutathione hydrolase
GeneID:100301943	49.9676	-2.7026	0.00759351	0.0719436	100301943	homeodomain leucine zipper protein
GeneID:101253569	12.4894	-5.5358	0.00766199	0.0722362	101253569	homeobox-leucine zipper protein HDG11
GeneID:101245918	10.4311	-5.2761	0.0076524	0.0722362	101245918	alcohol dehydrogenase-like 3
GeneID:101250866	10.612	-4.21523	0.00767717	0.0722362	101250866	uncharacterized protein LOC101250866
GeneID:101249611	13.4723	-3.91326	0.00766537	0.0722362	101249611	calcineurin B-like protein
GeneID:101253522	24.037	-3.51122	0.00765103	0.0722362	101253522	F-box/kelch-repeat protein At1g57790-like
GeneID:101251611	53.2061	-2.73805	0.00767779	0.0722362	101251611	probable ADP-ribosylation factor GTPase-activating protein AGD6
GeneID:101244134	10.1101	-5.24586	0.00769095	0.0722976	101244134	UDP-glycosyltransferase TURAN isoform X1
GeneID:101257776	8.68998	-5.0431	0.00770734	0.0723892	101257776	heat stress transcription factor A-6b
GeneID:101248349	22.715	-3.6675	0.00771939	0.0724399	101248349	phosphatidylinositol 4-kinase beta 1-like isoform X1
GeneID:101247767	11.7124	-4.3746	0.00773503	0.0725242	101247767	phosphoinositide phosphatase SAC8 isoform X1
GeneID:101244995	11.7292	-5.43172	0.0077663	0.0726533	101244995	cucumber peeling cupredoxin
GeneID:101256740	8.23122	-4.94544	0.00777332	0.0726533	101256740	dihydroceramide fatty acyl 2-hydroxylase FAH1
GeneID:101254617	31.683	-3.9488	0.00777122	0.0726533	101254617	cysteine synthase, chloroplastic/chromoplastic isoform X2
GeneID:101259201	28.9969	-3.22858	0.00777547	0.0726533	101259201	glutamate--tRNA ligase, chloroplastic/mitochondrial
GeneID:112941110	40.7133	-3.18144	0.00779511	0.0727744	112941110
GeneID:101245564	41.0696	-3.19327	0.00781388	0.0728872	101245564	multiprotein bridging factor 1c
GeneID:101250151	11.1621	-4.3029	0.00782906	0.0729663	101250151	transcriptional activator FHA1
GeneID:101248786	10.7574	-5.29413	0.00786661	0.0730662	101248786	monooxygenase 2 isoform X2
GeneID:101258771	8.39777	-4.96001	0.0078576	0.0730662	101258771	protein RICE SALT SENSITIVE 3
GeneID:101246803	8.30957	-4.93024	0.00788071	0.0731349	101246803	trehalose-phosphate phosphatase A
GeneID:101252368	17.0647	-3.85263	0.00792477	0.0734007	101252368	peroxidase 5
GeneID:101248885	49.3939	-3.23198	0.00792956	0.0734007	101248885	hypersensitive-induced reaction 1 protein
GeneID:101249033	11.1242	-5.37104	0.00797139	0.0736826	101249033	syntaxin-71
GeneID:101260924	10.4071	-5.25294	0.00798062	0.0736826	101260924	uncharacterized protein LOC101260924
GeneID:101259996	9.84916	-5.1957	0.00797475	0.0736826	101259996	heavy metal-associated isoprenylated plant protein 6
GeneID:101245562	8.94937	-5.03091	0.00798707	0.0736826	101245562	STOREKEEPER protein
GeneID:101245960	13.866	-3.9727	0.008036	0.0740712	101245960	alpha-1,3/1,6-mannosyltransferase ALG2
GeneID:101252505	98.4812	-2.9636	0.00807696	0.0743231	101252505	cysteine proteinase 3 precursor
GeneID:101252420	13.2141	-3.88132	0.00808834	0.0743649	101252420	uncharacterized protein LOC101252420
GeneID:104647190	22.9166	-3.64938	0.00813896	0.0747673	104647190	serine carboxypeptidase-like 17 isoform X2
GeneID:101246583	10.6053	-4.2271	0.00815174	0.0748216	101246583	CSC1-like protein HYP1 isoform X1
GeneID:101246159	21.0608	-3.54266	0.00816216	0.0748541	101246159	NAD-dependent malic enzyme 62 kDa isoform, mitochondrial
GeneID:101268634	9.9911	-5.2356	0.00821119	0.0751141	101268634	protein bicaudal C homolog 1
GeneID:101246964	22.3584	-3.61464	0.0082035	0.0751141	101246964	uncharacterized protein LOC101246964
GeneID:101263815	48.2373	-2.94233	0.00820802	0.0751141	101263815	uncharacterized protein LOC101263815
GeneID:101262817	10.0546	-5.23919	0.00823823	0.0752014	101262817	ATPase family AAA domain-containing protein 1 isoform X4
GeneID:101246793	10.1954	-5.22613	0.00827152	0.0752014	101246793	ubiquitin-like modifier-activating enzyme atg7
GeneID:101246292	8.92587	-5.06984	0.00824793	0.0752014	101246292	uncharacterized protein At5g01610
GeneID:101250184	8.4764	-4.97113	0.00827471	0.0752014	101250184	uncharacterized protein LOC101250184
GeneID:101253115	7.78801	-4.86504	0.00825955	0.0752014	101253115	hsp70-binding protein 1
GeneID:101265629	13.8882	-4.59807	0.00825529	0.0752014	101265629	probable serine/threonine-protein kinase DDB_G0291350
GeneID:101262362	14.8121	-4.03667	0.00827595	0.0752014	101262362	thioredoxin M3, chloroplastic
GeneID:101250679	8.77069	-5.05446	0.00834047	0.0752847	101250679	uncharacterized protein LOC101250679
GeneID:101246942	7.93659	-4.89874	0.0083339	0.0752847	101246942	F-box/LRR-repeat MAX2 homolog A-like
GeneID:101246147	8.01536	-4.87858	0.00830188	0.0752847	101246147	AP-2 complex subunit alpha-1-like
GeneID:101264281	11.2655	-4.29042	0.00834921	0.0752847	101264281	RING-H2 finger protein ATL52
GeneID:101252075	15.3926	-4.09629	0.00832601	0.0752847	101252075	tricalbin-3
GeneID:101255581	15.1044	-4.08812	0.00835422	0.0752847	101255581	zinc finger protein CONSTANS-LIKE 16
GeneID:101248688	13.9198	-3.98888	0.00831972	0.0752847	101248688	NPL4-like protein 2
GeneID:101251979	13.5703	-3.95181	0.00833337	0.0752847	101251979	glutamine--tRNA ligase isoform X1
GeneID:101267965	46.9429	-3.21974	0.00829484	0.0752847	101267965	magnesium transporter MRS2-11, chloroplastic
GeneID:101254034	12.0967	-4.37703	0.00841181	0.0756678	101254034	serine/threonine-protein kinase tricorner
GeneID:101262582	11.0422	-4.25488	0.00843466	0.075759	101262582	protein SCAI
GeneID:101244418	8.19752	-4.92581	0.00845635	0.0758287	101244418	F-box/kelch-repeat protein At3g23880-like
GeneID:101244153	12.6699	-4.48244	0.00848684	0.0759771	101244153	probable prolyl 4-hydroxylase 9
GeneID:101261108	10.499	-4.20677	0.00849539	0.0759912	101261108
GeneID:101266492	10.272	-4.16886	0.00851477	0.0761021	101266492	trihelix transcription factor ASIL1
GeneID:101251038	8.15284	-4.9427	0.00852672	0.0761464	101251038	histidine--tRNA ligase, cytoplasmic
GeneID:101256193	12.0521	-5.48502	0.0086201	0.0762215	101256193	AFG1-like ATPase isoform X1
GeneID:104645948	9.13575	-5.05854	0.00857108	0.0762215	104645948	uncharacterized protein LOC104645948
GeneID:101261965	8.05366	-4.92526	0.00857088	0.0762215	101261965	chromo domain protein LHP1-like
GeneID:101266120	7.9954	-4.91403	0.00863489	0.0762215	101266120	uncharacterized protein At4g28440-like
GeneID:101262183	8.20636	-4.90236	0.00863686	0.0762215	101262183	plastidial pyruvate kinase 2
GeneID:101265464	7.61578	-4.83173	0.00858332	0.0762215	101265464	probable E3 ubiquitin-protein ligase RHC1A
GeneID:101246767	12.5109	-4.43463	0.00858366	0.0762215	101246767	uncharacterized protein LOC101246767
GeneID:101253750	11.5006	-4.34369	0.00862348	0.0762215	101253750	NEP1-interacting protein-like 1
GeneID:100750253	11.8324	-4.34072	0.00864007	0.0762215	100750253	delta14-sterol reductase
GeneID:101247779	11.43	-4.28192	0.00855618	0.0762215	101247779	protein disulfide-isomerase 5-2
GeneID:101245351	11.3791	-4.27404	0.00862969	0.0762215	101245351	protein PHYLLO, chloroplastic isoform X1
GeneID:101258718	13.393	-3.91735	0.00863555	0.0762215	101258718	transcription factor TFIIIB component B'' isoform X1
GeneID:3950396	37.1098	-3.64941	0.00863485	0.0762215	3950396	NADH-plastoquinone oxidoreductase subunit K
GeneID:101247579	21.9815	-3.59172	0.00861986	0.0762215	101247579	universal stress protein PHOS32
GeneID:101246410	35.8279	-2.97586	0.00858105	0.0762215	101246410	uncharacterized protein LOC101246410
GeneID:544009	17.5067	-4.25791	0.0087064	0.0764969	544009	linoleate 13S-lipoxygenase 3-1, chloroplastic
GeneID:101256451	19.5842	-3.71887	0.00870085	0.0764969	101256451	mannose-6-phosphate isomerase 1-like
GeneID:101261178	20.7285	-3.49921	0.00869857	0.0764969	101261178	TBCC domain-containing protein 1
GeneID:101255883	9.57059	-5.11543	0.0087174	0.0765318	101255883	homeobox-leucine zipper protein HAT5
GeneID:101266225	13.0372	-3.88109	0.00873127	0.0765919	101266225	uncharacterized protein LOC101266225 isoform X1
GeneID:101266189	40.2655	-3.16867	0.00876141	0.0767327	101266189	F-box protein At2g27310
GeneID:543966	50.7354	-2.95548	0.00875669	0.0767327	543966	clp-like energy-dependent protease
GeneID:101255734	9.14157	-5.08933	0.00880663	0.077005	101255734	flavonoid 3',5'-methyltransferase
GeneID:778319	7.58627	-4.8386	0.00880034	0.077005	778319
GeneID:101255820	8.95017	-5.04142	0.00884724	0.077225	101255820	transcription termination factor MTEF1, chloroplastic isoform X1
GeneID:100316888	8.57625	-4.99826	0.00885306	0.077225	100316888	ELF4-like protein isoform X1
GeneID:101256083	24.6712	-3.56168	0.00884778	0.077225	101256083	uncharacterized protein LOC101256083
GeneID:101249373	8.62127	-5.02634	0.00886674	0.0772825	101249373	25.3 kDa vesicle transport protein
GeneID:109120156	8.6786	-5.04213	0.00894813	0.0777445	109120156
GeneID:101249395	7.5575	-4.82344	0.00894044	0.0777445	101249395	oxysterol-binding protein-related protein 2A isoform X2
GeneID:543767.1	13.3726	-3.93152	0.00894103	0.0777445	543767.1
GeneID:778343	29.7125	-3.63246	0.00899734	0.0780263	778343	dehydroascorbate reductase
GeneID:778218	133.645	-2.83398	0.00900221	0.0780263	778218	oxoglutarate/malate translocator
GeneID:101257991	33.4401	-3.33647	0.00901923	0.0781117	101257991	uncharacterized protein LOC101257991 isoform X1
GeneID:101245917	8.5093	-4.99595	0.00905079	0.0782606	101245917	splicing factor U2af small subunit B
GeneID:101055607	17.095	-3.83345	0.00907255	0.0783865	101055607	Hop-interacting protein THI105
GeneID:101264048	14.6953	-4.66025	0.00908684	0.0784478	101264048	uncharacterized protein LOC101264048 isoform X1
GeneID:101248258	8.22247	-4.95543	0.00912102	0.0785303	101248258	putative U-box domain-containing protein 50
GeneID:101249028	8.14785	-4.90825	0.00914685	0.0785303	101249028	F-box protein At4g00755
GeneID:101251768	7.89625	-4.85387	0.00914526	0.0785303	101251768	protein PHR1-LIKE 3 isoform X1
GeneID:101260735	11.9544	-4.39925	0.00912676	0.0785303	101260735	uncharacterized protein LOC101260735
GeneID:101246405	17.6911	-3.53212	0.00913451	0.0785303	101246405	uncharacterized protein LOC101246405 isoform X1
GeneID:101243907	78.5151	-3.5133	0.00912808	0.0785303	101243907	fructose-bisphosphate aldolase, cytoplasmic isozyme 1
GeneID:101264109	145.22	-2.34692	0.00912625	0.0785303	101264109	ribulose-phosphate 3-epimerase, chloroplastic
GeneID:101249847	10.4167	-5.27498	0.00916248	0.0785809	101249847	polygalacturonase inhibitor
GeneID:101260190	11.8704	-4.38555	0.00916717	0.0785809	101260190	acyltransferase-like protein At3g26840, chloroplastic isoform X2
GeneID:101260926	10.0815	-5.20939	0.00921087	0.0786521	101260926	uncharacterized protein LOC101260926
GeneID:101264044	8.08317	-4.94231	0.00918971	0.0786521	101264044	selenoprotein H
GeneID:101258578	8.25884	-4.94135	0.00921157	0.0786521	101258578	rhomboid-like protein 11, chloroplastic
GeneID:112941537	8.05	-4.88292	0.00921057	0.0786521	112941537	GDSL esterase/lipase At3g26430-like isoform X2
GeneID:101249833	7.53869	-4.81508	0.00919623	0.0786521	101249833	choline monooxygenase, chloroplastic-like
GeneID:101265370	10.7902	-5.30924	0.00924951	0.0786616	101265370	syntaxin-43
GeneID:101258309	9.97572	-5.18584	0.00926789	0.0786616	101258309	uncharacterized protein LOC101258309
GeneID:101251208	8.72361	-5.03457	0.00925053	0.0786616	101251208	probable methyltransferase PMT21
GeneID:101259394	16.7093	-3.80948	0.00925822	0.0786616	101259394	G-type lectin S-receptor-like serine/threonine-protein kinase At1g34300
GeneID:101267838	20.5557	-3.79941	0.00925127	0.0786616	101267838	uncharacterized protein LOC101267838 isoform X1
GeneID:101250370	22.746	-3.42399	0.0092657	0.0786616	101250370	proteasome subunit alpha type-6
GeneID:101249905	163.376	-2.83983	0.00927044	0.0786616	101249905	40S ribosomal protein S19-3
GeneID:101248302	205.547	-2.40015	0.00924727	0.0786616	101248302	40S ribosomal protein S26-3
GeneID:101243746	10.1247	-4.15441	0.00930197	0.0788677	101243746	trafficking protein particle complex subunit 3
GeneID:101259341	15.8392	-3.74126	0.00931188	0.0788903	101259341	uncharacterized protein LOC101259341
GeneID:101257779	9.0679	-5.10737	0.00932304	0.0788947	101257779	serine/threonine-protein kinase STY13
GeneID:101262316	9.24217	-5.09973	0.00935325	0.0789209	101262316
GeneID:101246121	15.7711	-4.1765	0.00935896	0.0789209	101246121	T-complex protein 1 subunit delta
GeneID:101248981	10.081	-4.14843	0.00934152	0.0789209	101248981	transcription factor RF2b
GeneID:101247864	25.8984	-3.21993	0.00934638	0.0789209	101247864	magnesium transporter MRS2-4
GeneID:101251282	7.77637	-4.82952	0.00944652	0.0795111	101251282	peroxisomal membrane protein 11A
GeneID:101267193	11.5654	-4.34217	0.00945712	0.0795111	101267193	N-acylphosphatidylethanolamine synthase isoform X2
GeneID:101251452	18.6658	-3.61946	0.00946176	0.0795111	101251452	caffeic acid 3-O-methyltransferase
GeneID:101246002	23.6627	-3.49533	0.00944256	0.0795111	101246002	uncharacterized protein LOC101246002
GeneID:101261200	44.9519	-2.99341	0.00946543	0.0795111	101261200	multiprotein-bridging factor 1b
GeneID:101253082	15.1746	-3.6479	0.00949081	0.0796088	101253082	pyrophosphate-energized membrane proton pump 3-like
GeneID:101263162	10.0594	-4.12806	0.00950087	0.0796246	101263162	nuclear envelope-associated protein 2 isoform X2
GeneID:101265117	7.77929	-4.86237	0.00952593	0.0797732	101265117	F-box/LRR-repeat protein 3
GeneID:101258662	11.2671	-4.31499	0.00955868	0.079986	101258662	probable RNA helicase SDE3
GeneID:101259686	35.9886	-2.97222	0.00958141	0.0801147	101259686	NADH dehydrogenase ubiquinone
GeneID:101247618	11.1182	-4.24155	0.00959713	0.0801846	101247618	phenylalanine--tRNA ligase, chloroplastic/mitochondrial
GeneID:101252970	10.6782	-4.22893	0.00964528	0.0805251	101252970	39S ribosomal protein L47, mitochondrial
GeneID:101261792	9.20961	-5.09276	0.00967815	0.0806273	101261792	BTB/POZ domain-containing protein POB1 isoform X2
GeneID:101255387	12.4344	-4.43753	0.00967271	0.0806273	101255387	ABC transporter G family member 24-like
GeneID:101267451	13.295	-3.91825	0.00968712	0.0806273	101267451	GRF1-interacting factor 3 isoform X1
GeneID:101267572	7.40725	-4.7856	0.00971212	0.0807737	101267572	uncharacterized protein LOC101267572
GeneID:101249731	15.2536	-3.68301	0.00972758	0.0808405	101249731	glycerol-3-phosphate acyltransferase 5-like
GeneID:101252640	10.6797	-4.20317	0.00976199	0.0809413	101252640	protein SUPPRESSOR OF FRI 4 isoform X2
GeneID:101264429	27.5609	-3.15851	0.0097568	0.0809413	101264429	multiple organellar RNA editing factor 2, chloroplastic
GeneID:101248794	7.60649	-4.83639	0.00977711	0.0810051	101248794	membrane-associated progesterone-binding protein 4
GeneID:101258606	38.3919	-3.19617	0.00982949	0.0813771	101258606	histone-lysine N-methyltransferase, H3 lysine-9 specific SUVH1
GeneID:101265446	8.93566	-5.0612	0.00988403	0.0815924	101265446	protein Dr1 homolog
GeneID:101243891	33.1151	-3.06461	0.00989342	0.0815964	101243891	uncharacterized protein LOC101243891
GeneID:101245631	9.44706	-5.09847	0.00990302	0.0816138	101245631	uncharacterized protein At4g14100
GeneID:101244814	7.46504	-4.82077	0.00991755	0.0816717	101244814	protein XAP5 CIRCADIAN TIMEKEEPER
GeneID:101262232	14.2983	-4.01079	0.00992925	0.0817063	101262232	homeobox-leucine zipper protein HAT4
GeneID:101266178	11.0897	-5.35203	0.00994163	0.0817465	101266178	uncharacterized protein LOC101266178
GeneID:101247317	44.119	-2.87799	0.00995199	0.0817699	101247317	BEACH domain-containing protein B isoform X1
GeneID:101260633	8.04288	-4.93294	0.0100014	0.0821142	101260633	uncharacterized protein LOC101260633
GeneID:101267456	7.66903	-4.86484	0.0100994	0.0822771	101267456	uncharacterized protein LOC101267456
GeneID:101262674	7.33993	-4.76378	0.0100495	0.0822771	101262674	probable plastid-lipid-associated protein 13, chloroplastic
GeneID:101252447	11.8447	-4.36589	0.0100718	0.0822771	101252447	subtilisin-like protease SBT1.9
GeneID:101259114	10.4486	-4.18292	0.0101162	0.0822771	101259114	uncharacterized protein LOC101259114
GeneID:101259117	10.0625	-4.12838	0.0101008	0.0822771	101259117	vacuolar protein sorting-associated protein 24 homolog 1-like
GeneID:101266355	12.7619	-3.82955	0.0100901	0.0822771	101266355	uncharacterized protein LOC101266355
GeneID:101248248	15.6914	-3.70986	0.01008	0.0822771	101248248	uncharacterized protein LOC101248248
GeneID:101266652	22.2694	-3.65047	0.0100822	0.0822771	101266652	GDSL esterase/lipase At2g04570
GeneID:544270	27.6335	-3.35598	0.0100362	0.0822771	544270
GeneID:101263563	24.6061	-3.33599	0.0101194	0.0822771	101263563	putative glucose-6-phosphate 1-epimerase
GeneID:101257121	161.708	-2.73693	0.0100856	0.0822771	101257121	60S ribosomal protein L21-2
GeneID:101258973	10.1353	-5.25579	0.0101392	0.0823147	101258973	alpha/beta hydrolase domain-containing protein WAV2 isoform X2
GeneID:101258121	7.84862	-4.85408	0.0101347	0.0823147	101258121	vacuolar protein sorting-associated protein 28 homolog 2 isoform X1
GeneID:101258064	7.40002	-4.80328	0.0101576	0.082403	101258064	uncharacterized protein LOC101258064
GeneID:101262972	8.7624	-5.02685	0.0102017	0.0826313	101262972	pollen allergen Che a 1
GeneID:101249329	10.8914	-4.2265	0.0101997	0.0826313	101249329	tetraspanin-3
GeneID:101252882	13.0355	-3.86454	0.0102085	0.0826313	101252882	ras-related protein RABD2a
GeneID:101260059	14.8039	-4.04322	0.0102465	0.0827223	101260059	uncharacterized protein LOC101260059 isoform X1
GeneID:101260815	17.1303	-3.86488	0.0102502	0.0827223	101260815	binding partner of ACD11 1
GeneID:101262855	21.286	-3.27373	0.0102729	0.0827223	101262855	BTB/POZ and MATH domain-containing protein 2
GeneID:109120159	43.6883	-2.9364	0.0102569	0.0827223	109120159	LOW QUALITY PROTEIN
GeneID:101261596	93.6023	-2.72607	0.0102662	0.0827223	101261596	polyadenylate-binding protein 2-like
GeneID:101267835	29.7572	-3.15061	0.0102874	0.082778	101267835	uncharacterized protein LOC101267835 isoform X3
GeneID:101267337	29.7603	-3.14892	0.0103019	0.0827825	101267337	putative 26S proteasome subunit
GeneID:101262999	7.76025	-4.88455	0.0103398	0.0830154	101262999	LOW QUALITY PROTEIN
GeneID:101256549	7.61934	-4.852	0.0103582	0.0831021	101256549	altered inheritance of mitochondria protein 32-like
GeneID:101265934	9.65928	-5.13841	0.0104249	0.0832666	101265934	exocyst complex component EXO70A1
GeneID:101267328	8.73392	-5.04952	0.0104273	0.0832666	101267328	probable pre-mRNA-splicing factor ATP-dependent RNA helicase DEAH5
GeneID:101262172	8.6139	-4.99643	0.0104225	0.0832666	101262172	uncharacterized protein LOC101262172
GeneID:101268835	9.83429	-4.09857	0.0104021	0.0832666	101268835	uncharacterized protein LOC101268835 isoform X1
GeneID:101250094	19.9209	-3.4606	0.0104322	0.0832666	101250094	protein LOW PSII ACCUMULATION 2, chloroplastic
GeneID:101261890	10.7049	-4.23695	0.010453	0.0833392	101261890	heptahelical transmembrane protein ADIPOR1-like
GeneID:101262920	12.2641	-3.78694	0.0104566	0.0833392	101262920	uncharacterized protein LOC101262920 isoform X1
GeneID:101258193	12.0351	-4.35669	0.0105283	0.0838491	101258193	bifunctional fucokinase/fucose pyrophosphorylase isoform X1
GeneID:101254614	15.9392	-4.19744	0.0105378	0.0838637	101254614	protein disulfide isomerase-like 5-4
GeneID:101261019	9.69659	-5.19031	0.0105648	0.0839595	101261019	U-box domain-containing protein 28-like
GeneID:101257915	7.6075	-4.81943	0.0105653	0.0839595	101257915	protease Do-like 7
GeneID:101267457	12.3724	-4.42519	0.0105786	0.0840042	101267457	mitochondrial carrier protein MTM1
GeneID:101256730	23.7386	-3.29032	0.0106048	0.0841506	101256730	DNA-binding protein S1FA
GeneID:101261939	16.2312	-3.75725	0.0106162	0.0841798	101261939	aminoacyl tRNA synthase complex-interacting multifunctional protein 1
GeneID:101266992	8.73641	-5.01935	0.010629	0.0841851	101266992	octanoyltransferase LIP2, mitochondrial
GeneID:101256129	14.5318	-4.02523	0.0106323	0.0841851	101256129	tudor domain-containing protein
GeneID:101264657	8.9661	-5.04928	0.0106467	0.0842109	101264657	peptidyl-tRNA hydrolase ICT1, mitochondrial isoform X2
GeneID:101246587	32.7323	-3.04934	0.010651	0.0842109	101246587	serine/arginine-rich splicing factor SR45a
GeneID:543542	9.27797	-5.11929	0.0106794	0.0843745	543542
GeneID:101267699	7.80115	-4.87227	0.0106961	0.0844445	101267699	glucan endo-1,3-beta-glucosidase 3
GeneID:101246135	10.1703	-4.13777	0.0107452	0.0847714	101246135	ATP-citrate synthase alpha chain protein 2
GeneID:101257962	9.18865	-5.11382	0.0107682	0.0848165	101257962	cytochrome P450 97B2, chloroplastic isoform X1
GeneID:101255141	7.37132	-4.78925	0.0107665	0.0848165	101255141	calmodulin-binding receptor-like cytoplasmic kinase 2 isoform X2
GeneID:101259970	10.9639	-4.2297	0.0107955	0.0848165	101259970	A20/AN1 zinc finger protein
GeneID:101243851	9.63247	-4.05871	0.0107828	0.0848165	101243851	U-box domain-containing protein 8
GeneID:101259841	8.15196	-4.87843	0.0108464	0.0848786	101259841	uncharacterized protein LOC101259841
GeneID:101259437	7.12451	-4.74659	0.0108523	0.0848786	101259437	cytosolic sulfotransferase 12-like
GeneID:101263660	10.3105	-4.16828	0.0108436	0.0848786	101263660	alpha/beta hydrolase domain-containing protein 17B
GeneID:101247453	10.4034	-4.14885	0.0108318	0.0848786	101247453	ribonuclease II, chloroplastic/mitochondrial isoform X2
GeneID:101250571	62.5309	-2.85986	0.0108515	0.0848786	101250571	28 kDa heat- and acid-stable phosphoprotein
GeneID:101253991	7.09192	-4.72249	0.0108829	0.0849349	101253991	pentatricopeptide repeat-containing protein At5g04810, chloroplastic-like
GeneID:101263130	16.6885	-3.82478	0.0108805	0.0849349	101263130	transcription initiation factor IIF subunit beta
GeneID:778224	21.1114	-3.31039	0.0108728	0.0849349	778224	cytosolic ascorbate peroxidase 2
GeneID:112940957	9.78045	-5.19847	0.0109171	0.085103	112940957	uncharacterized protein LOC112940957
GeneID:101257363	12.0056	-4.39009	0.0109384	0.085103	101257363	dynamin-related protein 4C
GeneID:101264810	17.0577	-4.29149	0.0109428	0.085103	101264810	transcription factor MYB86-like isoform X2
GeneID:101268522	10.6426	-4.22376	0.0109378	0.085103	101268522	serine/threonine-protein kinase STY46
GeneID:101268074	10.2157	-4.14458	0.0109435	0.085103	101268074	H/ACA ribonucleoprotein complex subunit 2-like protein
GeneID:101247526	7.3289	-4.79993	0.0109686	0.0851162	101247526	transcription factor TGA2.3-like
GeneID:101254433	10.8904	-4.20645	0.0109535	0.0851162	101254433	ADP-ribosylation factor-related protein 1
GeneID:101266384	13.4154	-3.89097	0.0109674	0.0851162	101266384	RNA polymerase II C-terminal domain phosphatase-like 1
GeneID:101248561	7.99142	-4.88429	0.0110158	0.0854216	101248561	coatomer subunit beta'-2 isoform X1
GeneID:101251016	10.5916	-4.20418	0.011028	0.0854552	101251016	nucleolin
GeneID:778302	12.4327	-4.42811	0.0110447	0.0855235	778302	multicopper oxidase-like protein precursor
GeneID:544118	14.604	-4.66114	0.0110593	0.0855762	544118
GeneID:101268486	7.49471	-4.80596	0.0110886	0.0857078	101268486	uncharacterized protein LOC101268486
GeneID:101263471	18.6631	-3.76902	0.0110921	0.0857078	101263471	apoptosis inhibitor 5-like protein API5
GeneID:101245418	9.33811	-5.11573	0.0111317	0.0859535	101245418	uncharacterized protein LOC101245418
GeneID:101244475	9.55247	-5.12601	0.0111686	0.0861771	101244475	protein DEHYDRATION-INDUCED 19 homolog 5 isoform X2
GeneID:101243904	8.96758	-5.0764	0.0111775	0.0861846	101243904	STOREKEEPER protein
GeneID:101243774	8.41649	-4.96604	0.0112335	0.0863969	101243774	phosphoglucan phosphatase LSF1, chloroplastic isoform X4
GeneID:101266682	7.23539	-4.76916	0.0112263	0.0863969	101266682	rhomboid superfamily protein
GeneID:101250586	25.6088	-4.11966	0.0112172	0.0863969	101250586	palmitoyl-monogalactosyldiacylglycerol delta-7 desaturase, chloroplastic
GeneID:101257676	41.9289	-3.34575	0.0112401	0.0863969	101257676	photosystem II reaction center W protein, chloroplastic
GeneID:543556	17.1595	-3.51227	0.0112581	0.0864394	543556
GeneID:101255798	7.00463	-4.72091	0.0112828	0.0865065	101255798	reticulon-like protein B16 isoform X2
GeneID:101246384	12.4154	-3.79366	0.0113208	0.0867369	101246384	root phototropism protein 3-like
GeneID:101247925	7.24709	-4.7453	0.0113698	0.0867514	101247925	ubiquitin-60S ribosomal protein L40-like
GeneID:101266245	13.0768	-4.48721	0.0113565	0.0867514	101266245	tyramine N-feruloyltransferase 4/11
GeneID:101268638	9.81967	-4.10997	0.0113575	0.0867514	101268638	F-box/FBD/LRR-repeat protein At1g13570-like
GeneID:101256112	9.44872	-4.03726	0.0113468	0.0867514	101256112	uncharacterized protein LOC101256112
GeneID:101244994	19.0992	-3.39029	0.0113614	0.0867514	101244994	vesicle-associated protein 1-1
GeneID:101266257	34.8771	-3.04345	0.0113705	0.0867514	101266257	transcription factor Pur-alpha 1 isoform X2
GeneID:101258465	11.9415	-5.42319	0.011441	0.0871933	101258465	bifunctional aspartokinase/homoserine dehydrogenase 1, chloroplastic
GeneID:101248148	7.88244	-4.87774	0.011447	0.0871933	101248148	uncharacterized protein LOC101248148 isoform 1
GeneID:101250670	7.37626	-4.79282	0.0114531	0.0871933	101250670	G-type lectin S-receptor-like serine/threonine-protein kinase SD3-1
GeneID:101245737	7.29978	-4.75912	0.0114664	0.0871933	101245737	guanine nucleotide-binding protein subunit beta-like protein isoform X2
GeneID:101257689	23.3752	-3.38794	0.0114684	0.0871933	101257689	ankyrin repeat-containing protein NPR4-like
GeneID:101246801	7.20163	-4.77211	0.0114811	0.0872064	101246801
GeneID:104649474	7.16957	-4.76575	0.0115013	0.0872064	104649474	zinc finger BED domain-containing protein RICESLEEPER 1-like
GeneID:101256651	15.068	-4.09934	0.0115021	0.0872064	101256651	uncharacterized protein LOC101256651
GeneID:101260104	9.47904	-4.04067	0.011496	0.0872064	101260104	uncharacterized GPI-anchored protein At1g61900-like isoform X3
GeneID:101257187	7.72633	-4.81571	0.0115268	0.0873324	101257187	CST complex subunit CTC1-like isoform X2
GeneID:101257867	8.79418	-5.04584	0.0115404	0.0873753	101257867	geraniol 8-hydroxylase
GeneID:101261547	22.1739	-3.89105	0.0115722	0.0875548	101261547	33 kDa ribonucleoprotein, chloroplastic
GeneID:101260182	10.0497	-4.10847	0.0115928	0.0876498	101260182	uncharacterized protein LOC101260182
GeneID:101249890	14.6704	-4.02461	0.0116222	0.0878115	101249890	RING-box protein 1a
GeneID:101251051	9.94179	-5.19995	0.0116901	0.08808	101251051	rust resistance kinase Lr10
GeneID:101246836	9.62481	-5.12322	0.0116803	0.08808	101246836	cytochrome P450 94A1-like
GeneID:101262491	8.93885	-5.07183	0.0116862	0.08808	101262491	synaptotagmin-5-like
GeneID:101255124	7.44739	-4.7887	0.0116812	0.08808	101255124	U-box domain-containing protein 16
GeneID:101261821	18.4631	-3.63964	0.0117363	0.0883269	101261821	WD repeat-containing protein 70
GeneID:101267025	8.51501	-4.9511	0.0117938	0.0886776	101267025	hydroxyproline O-galactosyltransferase GALT3
GeneID:101251567	8.72356	-5.01983	0.0118433	0.0888044	101251567	uncharacterized protein LOC101251567
GeneID:101247288	7.05257	-4.70159	0.0118406	0.0888044	101247288	AAA-ATPase At3g28510-like
GeneID:101248833	9.74201	-4.05819	0.0118298	0.0888044	101248833	transmembrane emp24 domain-containing protein p24delta3
GeneID:101249500	7.29768	-4.78818	0.0118812	0.0889049	101249500	F-box protein SKIP23
GeneID:101247756	12.0306	-3.7548	0.011875	0.0889049	101247756	fanconi-associated nuclease 1 homolog
GeneID:101248614	14.3748	-3.58861	0.0118803	0.0889049	101248614	electron transfer flavoprotein subunit beta, mitochondrial
GeneID:109119841	7.55033	-4.83756	0.0119166	0.088936	109119841	bidirectional sugar transporter N3-like
GeneID:101248611	165.904	-2.67017	0.0119235	0.088936	101248611	small nuclear ribonucleoprotein SmD1b
GeneID:101255737	7.8116	-4.89302	0.0119691	0.0890128	101255737	uncharacterized protein LOC101255737
GeneID:101245612	11.4061	-4.26526	0.0119622	0.0890128	101245612	probable alpha,alpha-trehalose-phosphate synthase UDP-forming
GeneID:101249944	16.0779	-4.12656	0.0119541	0.0890128	101249944	psbP domain-containing protein 5, chloroplastic
GeneID:101249960	7.10478	-4.74103	0.0119778	0.0890165	101249960	putative glucose-6-phosphate 1-epimerase
GeneID:101251286	9.48644	-5.13336	0.0120513	0.0892576	101251286	teosinte glume architecture 1
GeneID:101257025	8.64289	-5.01494	0.012037	0.0892576	101257025	probable serine/threonine-protein kinase PIX13
GeneID:101256970	8.14684	-4.88905	0.0120749	0.0892576	101256970	mast cell carboxypeptidase A
GeneID:101254482	8.06635	-4.8695	0.0121413	0.0892576	101254482	uncharacterized protein LOC101254482
GeneID:101253037	7.91244	-4.84425	0.012022	0.0892576	101253037	binding partner of ACD11 1
GeneID:101254102	7.4122	-4.7815	0.0121319	0.0892576	101254102	probable UDP-N-acetylglucosamine--peptide N-acetylglucosaminyltransferase SPINDLY isoform X1
GeneID:101257550	9.46074	-4.02845	0.0120484	0.0892576	101257550	uncharacterized protein LOC101257550 isoform X1
GeneID:101256352	12.1181	-3.78241	0.012101	0.0892576	101256352	DDT domain-containing protein PTM
GeneID:101260589	11.6011	-3.69851	0.0120381	0.0892576	101260589	glucuronokinase 1
GeneID:100301981	22.8439	-3.23014	0.0121308	0.0892576	100301981	N-acetyl-glutamate synthase isoform X1
GeneID:101256774	27.167	-3.15876	0.0121298	0.0892576	101256774	U-box domain-containing protein 11
GeneID:101246577	30.2173	-3.04507	0.0120748	0.0892576	101246577	protein PHLOEM PROTEIN 2-LIKE A9
GeneID:101253410	57.8002	-3.00585	0.0121215	0.0892576	101253410	uncharacterized protein At5g02240
GeneID:101252850	51.41	-2.74232	0.012141	0.0892576	101252850	UPF0426 protein At1g28150, chloroplastic
GeneID:101253128	7.40222	-4.78666	0.0122251	0.0894463	101253128	uncharacterized protein LOC101253128
GeneID:101243638	15.0435	-4.66685	0.0122253	0.0894463	101243638	thylakoid lumenal 19 kDa protein, chloroplastic
GeneID:101245282	20.4083	-3.85513	0.0122036	0.0894463	101245282	protein LURP-one-related 10
GeneID:101263072	19.6229	-3.74467	0.0121992	0.0894463	101263072	microsomal glutathione S-transferase 3
GeneID:101264486	18.1608	-3.34579	0.0122327	0.0894463	101264486	probable magnesium transporter NIPA6 isoform X1
GeneID:101252577	27.0076	-3.156	0.0122322	0.0894463	101252577	probable galacturonosyltransferase 4 isoform X1
GeneID:101246756	24.1354	-3.11566	0.012208	0.0894463	101246756	V-type proton ATPase subunit D
GeneID:101257565	7.27968	-4.79052	0.0122477	0.089496	101257565	UPF0187 protein At3g61320, chloroplastic
GeneID:101257872	29.6424	-2.99898	0.0122618	0.0895392	101257872	nucleolin isoform X1
GeneID:101263012	18.8643	-3.37404	0.0122803	0.0896141	101263012	zeatin O-xylosyltransferase
GeneID:101254196	11.605	-3.6954	0.0122973	0.0896784	101254196	cytochrome P450 734A1
GeneID:101258892	38.6103	-3.00908	0.0123174	0.0897645	101258892
GeneID:101252507	8.62351	-4.99614	0.0123264	0.08977	101252507	protein KRI1 homolog
GeneID:101260394	7.29208	-4.79596	0.0123477	0.0898653	101260394	p21-activated protein kinase-interacting protein 1-like
GeneID:101256455	8.68668	-5.03338	0.0123732	0.0899906	101256455	ras-related protein Rab11B
GeneID:101264434	7.19225	-4.72646	0.0124183	0.0901432	101264434	phosphoserine phosphatase, chloroplastic isoform X1
GeneID:101267503	10.7977	-4.22048	0.0124185	0.0901432	101267503	ATP-citrate synthase beta chain protein 2
GeneID:101252524	9.46278	-4.01842	0.012419	0.0901432	101252524	pentatricopeptide repeat-containing protein At1g02150
GeneID:101251485	134.993	-2.69797	0.0124808	0.0905314	101251485	small nuclear ribonucleoprotein SmD1b
GeneID:101254695	13.3762	-4.52379	0.0125592	0.0910395	101254695	pleckstrin homology domain-containing protein 1
GeneID:101254517	8.54034	-4.98829	0.0125738	0.0910845	101254517	TMV resistance protein N-like
GeneID:101256892	47.592	-2.64152	0.0125854	0.0911085	101256892	60S ribosomal protein L39-3
GeneID:101251569	8.36932	-4.9487	0.0126255	0.0913377	101251569	nodulin-related protein 1
GeneID:101247051	8.61428	-4.98017	0.0126963	0.0917888	101247051	protein YABBY 4 isoform X1
GeneID:101255414	10.0932	-4.10547	0.0127252	0.0919368	101255414	probable serine/threonine-protein kinase BUD32 homolog isoform 1
GeneID:101256359	7.03973	-4.70311	0.0127465	0.0920298	101256359
GeneID:101246827	7.72805	-4.87045	0.0127614	0.0920765	101246827	pentatricopeptide repeat-containing protein At4g02820, mitochondrial
GeneID:101249663	53.4559	-2.65236	0.0127833	0.0921124	101249663	trifunctional UDP-glucose 4,6-dehydratase/UDP-4-keto-6-deoxy-D-glucose 3,5-epimerase/UDP-4-keto-L-rhamnose-reductase RHM1
GeneID:543613	9.69238	-5.15251	0.0128604	0.0924124	543613	sucrose transporter-like protein isoform 2
GeneID:101244793	9.12839	-5.10615	0.012842	0.0924124	101244793	uncharacterized protein LOC101244793
GeneID:101258516	16.5461	-4.23714	0.0128673	0.0924124	101258516	WUSCHEL-related homeobox 8
GeneID:101266467	13.1496	-3.87817	0.0128585	0.0924124	101266467	DNA polymerase zeta catalytic subunit
GeneID:101253118	8.55293	-4.9941	0.0128793	0.0924375	101253118	LIMR family protein At5g01460
GeneID:101256683	7.56194	-4.84725	0.0128984	0.0925135	101256683	transmembrane 9 superfamily member 1-like
GeneID:112942178	8.37786	-4.95847	0.0129115	0.0925296	112942178
GeneID:101249322	11.1863	-4.23367	0.0129176	0.0925296	101249322	probable 2-carboxy-D-arabinitol-1-phosphatase
GeneID:543512	15.9476	-3.38249	0.0129316	0.0925686	543512	nonclathrin coat protein zeta1-COP isoform X1
GeneID:101265517	8.82718	-5.02401	0.0129726	0.0927972	101265517	G-type lectin S-receptor-like serine/threonine-protein kinase LECRK2
GeneID:104647356	6.93525	-4.71282	0.0129882	0.0927972	104647356
GeneID:104648938	21.5346	-3.33594	0.012989	0.0927972	104648938	uncharacterized protein LOC104648938
GeneID:101265902	8.78819	-5.00587	0.0130385	0.0930213	101265902	O-fucosyltransferase 21-like
GeneID:101248245	11.6873	-4.32486	0.0130466	0.0930213	101248245	chaperone protein dnaJ 10
GeneID:101250221	27.5857	-3.02154	0.0130631	0.0930213	101250221	cytochrome b-c1 complex subunit 8-like
GeneID:101248541	33.3081	-2.97315	0.0130578	0.0930213	101248541	immune-associated nucleotide-binding protein 9
GeneID:543670	7.45043	-4.80131	0.0130867	0.0931285	543670	plastid quinol oxidase
GeneID:101246882	7.5349	-4.83947	0.0131134	0.0932169	101246882	E3 ubiquitin-protein ligase CIP8-like isoform X1
GeneID:101252823	7.68307	-4.79836	0.0131163	0.0932169	101252823	uncharacterized protein LOC101252823
GeneID:101251664	7.01498	-4.73407	0.0131254	0.093221	101251664	pyridoxal 5'-phosphate synthase-like subunit PDX1.2
GeneID:101247141	6.65085	-4.63397	0.0131834	0.093538	101247141	trafficking protein particle complex II-specific subunit 130 homolog isoform X1
GeneID:101245803	17.5931	-3.56865	0.0131872	0.093538	101245803	probable NAD(P)H dehydrogenase (quinone) FQR1-like 1
GeneID:101245675	11.5168	-3.68769	0.0132116	0.0936501	101245675	uncharacterized protein LOC101245675
GeneID:101262250	9.14255	-4.00399	0.0132622	0.0938255	101262250	uncharacterized protein LOC101262250 isoform X2
GeneID:101245968	19.9841	-3.44576	0.0132565	0.0938255	101245968	protein CWC15 homolog isoform X2
GeneID:101245387	43.5307	-2.79244	0.0132618	0.0938255	101245387	hsp70-Hsp90 organizing protein 2
GeneID:101259769	13.5906	-3.95321	0.0132981	0.0938968	101259769	uncharacterized protein LOC101259769
GeneID:543563	14.4424	-3.61094	0.0132901	0.0938968	543563	annexin p35
GeneID:101244801	63.8413	-2.75078	0.0132956	0.0938968	101244801	GDSL esterase/lipase At1g09390-like
GeneID:101262877	9.64966	-4.08661	0.0133268	0.0940386	101262877	serine/threonine-protein kinase D6PK
GeneID:101263675	7.87339	-4.8697	0.0133619	0.0940428	101263675	2-phytyl-1,4-beta-naphthoquinone methyltransferase, chloroplastic isoform X1
GeneID:101259620	7.84109	-4.86911	0.0133489	0.0940428	101259620	plastid division protein CDP1, chloroplastic isoform X1
GeneID:101245772	7.62338	-4.84384	0.01335	0.0940428	101245772	guanine nucleotide-binding protein-like NSN1
GeneID:104648390	13.7459	-3.9713	0.0133597	0.0940428	104648390	G-type lectin S-receptor-like serine/threonine-protein kinase At4g03230 isoform X2
GeneID:101262730	6.64436	-4.63527	0.0133758	0.094049	101262730	putative late blight resistance protein homolog R1B-23
GeneID:112941668	207.294	-2.07037	0.0133801	0.094049	112941668
GeneID:101244653	7.35981	-4.81118	0.0133964	0.094059	101244653	ATP-dependent protease La (LON) domain protein
GeneID:101262656	12.711	-3.83631	0.0133988	0.094059	101262656	DUF724 domain-containing protein 10 isoform X1
GeneID:101264702	8.95828	-3.97042	0.0134098	0.094076	101264702	mediator of RNA polymerase II transcription subunit 17
GeneID:109119814	8.66774	-4.99191	0.0134633	0.0941479	109119814
GeneID:101244216	8.38659	-4.99042	0.0134555	0.0941479	101244216	uncharacterized protein LOC101244216
GeneID:101264649	6.92803	-4.69795	0.0134489	0.0941479	101264649	GPI-anchored protein LLG1
GeneID:101264385	12.1367	-4.40421	0.0134618	0.0941479	101264385	protein PIN-LIKES 3-like
GeneID:543894	29.0684	-3.4703	0.0134398	0.0941479	543894	SPM1 protein
GeneID:101254186	23.6618	-3.72354	0.0135162	0.0944577	101254186	uncharacterized protein LOC101254186 isoform X1
GeneID:101266904	34.8267	-2.94835	0.0135429	0.094583	101266904	RNA-binding (RRM/RBD/RNP motifs) family protein
GeneID:101266399	13.528	-3.48866	0.0135631	0.0946639	101266399	40S ribosomal protein S18
GeneID:101256765	7.13915	-4.74124	0.0135965	0.0948212	101256765	zeatin O-xylosyltransferase-like
GeneID:101254416	14.6887	-3.62355	0.0136217	0.0948296	101254416	uncharacterized protein LOC101254416
GeneID:101246362	13.6721	-3.49641	0.0136133	0.0948296	101246362	probable monogalactosyldiacylglycerol synthase, chloroplastic
GeneID:544238	21.6168	-3.57622	0.013638	0.0948824	544238	GTP cyclohydrolase II / 3,4-dihydroxy-2-butanone-4-phosphate synthase
GeneID:101248711	16.0686	-3.41868	0.0137122	0.0952773	101248711	probable ATP-dependent DNA helicase CHR12
GeneID:101261799	53.9238	-7.56824	0.0137285	0.0953298	101261799	uncharacterized protein LOC101261799
GeneID:101260110	6.65301	-4.63621	0.0137376	0.0953322	101260110	protein SPA, chloroplastic-like
GeneID:101266569	9.35642	-5.12733	0.0137687	0.0954283	101266569	WD-40 repeat-containing protein MSI2
GeneID:101254442	17.6676	-3.55352	0.013769	0.0954283	101254442	shaggy-related protein kinase epsilon isoform X1
GeneID:101266549	10.1862	-4.16657	0.013787	0.0954442	101266549	kelch-like protein diablo isoform X1
GeneID:101249479	112.061	-2.59856	0.0137888	0.0954442	101249479	60S acidic ribosomal protein P1
GeneID:101248154	9.67143	-4.03927	0.0138271	0.0955878	101248154	uncharacterized protein
GeneID:101265368	36.0931	-4.41858	0.0138433	0.095606	101265368	proteinase inhibitor I-B
GeneID:101267189	13.6452	-3.50859	0.0138473	0.095606	101267189	trafficking protein particle complex subunit 11 isoform X1
GeneID:101250958	8.38484	-4.91627	0.0138763	0.0956852	101250958	cinnamoyl-CoA reductase 1
GeneID:101257085	10.2416	-4.17449	0.0138716	0.0956852	101257085	uncharacterized protein LOC101257085 isoform X1
GeneID:101247553	24.4758	-3.15078	0.0138949	0.0957524	101247553	pre-mRNA-processing factor 39 isoform X1
GeneID:101244055	35.7782	-3.08522	0.0139266	0.0959107	101244055	CDGSH iron-sulfur domain-containing protein
GeneID:101263788	7.62159	-4.83535	0.0140309	0.096543	101263788	zinc finger Ran-binding domain-containing protein 2-like isoform X1
GeneID:101256642	19.6928	-3.45478	0.0140362	0.096543	101256642	uncharacterized protein LOC101256642
GeneID:101255830	10.9654	-4.22115	0.0140899	0.0967357	101255830	spermatogenesis-associated protein 20
GeneID:100037510	14.9304	-4.08368	0.0140833	0.0967357	100037510	SNF1-related kinase
GeneID:101266188	23.7863	-3.30421	0.0140908	0.0967357	101266188	lysosomal Pro-X carboxypeptidase
GeneID:101260882	16.2336	-3.75121	0.0141007	0.0967427	101260882	uncharacterized protein LOC101260882
GeneID:101257791	9.16116	-5.1042	0.0141117	0.0967573	101257791	probable LRR receptor-like serine/threonine-protein kinase At1g12460
GeneID:101249052	64.8924	-2.7341	0.0141397	0.0968878	101249052	putative elongation factor TypA-like SVR3, chloroplastic
GeneID:101243717	9.34562	-4.04254	0.0141866	0.0971358	101243717	uncharacterized protein LOC101243717
GeneID:101245215	9.15745	-4.00785	0.0141937	0.0971358	101245215	probable 2-oxoglutarate-dependent dioxygenase At3g50210
GeneID:101265454	9.6519	-4.06092	0.0142061	0.0971501	101265454	casein kinase 1-like protein 2 isoform X1
GeneID:101267322	15.8818	-3.40418	0.0142136	0.0971501	101267322	cadmium/zinc-transporting ATPase HMA3-like isoform X1
GeneID:101261361	7.42595	-4.74144	0.014256	0.097242	101261361	protein FAR1-RELATED SEQUENCE 11-like
GeneID:101268537	9.74319	-4.09929	0.0142583	0.097242	101268537	protein ANTI-SILENCING 1 isoform X1
GeneID:543567	19.5647	-3.19181	0.0142628	0.097242	543567
GeneID:101265441	10.4779	-5.26424	0.0143347	0.0972638	101265441	probable gamma-secretase subunit PEN-2
GeneID:104648855	10.6455	-4.23015	0.0142897	0.0972638	104648855	uncharacterized protein LOC104648855 isoform X2
GeneID:101251538	14.5108	-4.00697	0.0142982	0.0972638	101251538	CBL-interacting serine/threonine-protein kinase 20
GeneID:101244420	11.7842	-3.72383	0.0143374	0.0972638	101244420	glutamate--tRNA ligase, cytoplasmic
GeneID:101260057	15.4324	-3.34379	0.0143292	0.0972638	101260057	uncharacterized protein LOC101260057
GeneID:101261812	27.0278	-3.00819	0.0142914	0.0972638	101261812	phosphatidate phosphatase PAH2-like isoform X2
GeneID:101259813	39.2184	-2.96109	0.0143206	0.0972638	101259813	uncharacterized protein LOC101259813
GeneID:101246012	7.4532	-4.82718	0.0143632	0.0973605	101246012	2-alkenal reductase (NADP(+)-dependent)
GeneID:101257504	6.68859	-4.65961	0.0143784	0.0973605	101257504	B3 domain-containing protein At2g36080-like
GeneID:101264952	12.9112	-4.45198	0.0143711	0.0973605	101264952	uncharacterized protein LOC101264952
GeneID:101257295	15.5917	-4.15831	0.0144233	0.0975433	101257295	zinc finger CCCH domain-containing protein 17
GeneID:101267755	8.63833	-5.00024	0.0144505	0.0976212	101267755	uncharacterized protein LOC101267755
GeneID:101257146	9.49021	-4.05286	0.0144528	0.0976212	101257146	SKP1-like protein 21 isoform X1
GeneID:101248238	7.13946	-4.6945	0.0145084	0.0978729	101248238	methionine aminopeptidase 1A
GeneID:101264935	7.03456	-4.67355	0.0145281	0.0978729	101264935	uncharacterized protein LOC101264935 isoform X1
GeneID:101264487	9.33791	-4.01081	0.0145243	0.0978729	101264487	mitochondrial fission protein ELM1
GeneID:101253185	19.9381	-3.46113	0.0145439	0.0978729	101253185	protein FLX-like 3
GeneID:101265966	54.4918	-2.67817	0.0145432	0.0978729	101265966	uncharacterized protein LOC101265966
GeneID:101262796	7.36994	-4.77787	0.014624	0.098169	101262796	sulfite exporter TauE/SafE family protein 3
GeneID:101252735	6.42557	-4.59152	0.0146166	0.098169	101252735	CASP-like protein 5A1
GeneID:101257623	10.9626	-4.2751	0.0145986	0.098169	101257623	galactinol--sucrose galactosyltransferase
GeneID:101245969	9.29091	-4.01153	0.0146202	0.098169	101245969
GeneID:101258501	6.95953	-4.67313	0.0146635	0.0982533	101258501	protein JINGUBANG
GeneID:101255268	6.49828	-4.59881	0.0146636	0.0982533	101255268	serine/threonine-protein kinase GRIK1
GeneID:101265147	35.2716	-2.97145	0.0146726	0.0982533	101265147	uncharacterized protein LOC101265147
GeneID:101263228	50.8602	-2.72986	0.014662	0.0982533	101263228	uncharacterized protein LOC101263228 isoform X1
GeneID:101249894	6.42462	-4.57597	0.0146928	0.0982676	101249894	uncharacterized protein LOC101249894
GeneID:101264310	7.75578	-4.80643	0.0147201	0.0983296	101264310	uncharacterized protein LOC101264310
GeneID:101248757	172.962	-2.11024	0.0147376	0.0983864	101248757	UV-B-induced protein At3g17800, chloroplastic
GeneID:101247647	9.74962	-5.14228	0.0147513	0.0984172	101247647	expansin-like B1
GeneID:101262033	9.79597	-4.06082	0.0147765	0.0984755	101262033	probable GABA transporter 2
GeneID:101267849	28.8823	-2.98595	0.0147781	0.0984755	101267849	prohibitin-1, mitochondrial
GeneID:101250498	7.6811	-4.84924	0.0148228	0.0984817	101250498	uncharacterized protein LOC101250498
GeneID:101256809	7.71396	-4.82087	0.0148333	0.0984817	101256809	pentatricopeptide repeat-containing protein At3g62470, mitochondrial-like
GeneID:101253446	6.45768	-4.60724	0.0147977	0.0984817	101253446	phytochrome E isoform X1
GeneID:101260816	11.0107	-4.25599	0.0148136	0.0984817	101260816	cytochrome P450 CYP749A22-like isoform X1
GeneID:101250510	8.6765	-3.91593	0.0148226	0.0984817	101250510	40S ribosomal protein S8-2
GeneID:101268412	7.60895	-4.81559	0.0149413	0.0991118	101268412	uncharacterized protein LOC101268412
GeneID:101257207	9.24349	-3.98552	0.0149464	0.0991118	101257207	protein trichome birefringence-like 8
GeneID:101255929	6.99552	-4.70235	0.0149606	0.0991458	101255929	uncharacterized protein LOC101255929
GeneID:101261543	10.2724	-4.14518	0.0149725	0.099164	101261543	snurportin-1
GeneID:101252054	7.61316	-4.78255	0.0150253	0.0992727	101252054	4-coumarate--CoA ligase-like 9
GeneID:101267068	8.97713	-3.95739	0.0150147	0.0992727	101267068	NADH dehydrogenase ubiquinone
GeneID:101262980	31.3944	-2.88663	0.0150082	0.0992727	101262980	protein SKIP34
GeneID:101250500	6.76118	-4.6554	0.0150405	0.0993129	101250500	uncharacterized protein LOC101250500
GeneID:101261026	8.07362	-4.86308	0.0150609	0.099335	101261026	protein NRT1/ PTR FAMILY 1.2-like
GeneID:101268434	15.5455	-3.37228	0.0150621	0.099335	101268434	protein EXECUTER 1, chloroplastic
GeneID:101263688	7.04282	-4.7184	0.0150765	0.0993701	101263688	cadmium-induced protein AS8 isoform X2
GeneID:101267606	7.29688	-4.79045	0.0151963	0.0999223	101267606	trihelix transcription factor ASIL2 isoform X2
GeneID:101259369	12.3577	-4.43225	0.015197	0.0999223	101259369	short-chain dehydrogenase reductase 3b
GeneID:101253651	11.9271	-4.34187	0.0151835	0.0999223	101253651	uncharacterized protein LOC101253651 isoform X1
GeneID:101250060	11.7345	-4.30258	0.0151718	0.0999223	101250060	coiled-coil domain-containing protein 124
GeneID:101248325	69.0202	8.02706	1.77621e-06	0.00161265	101248325	putative serine/threonine-protein kinase isoform X1
GeneID:34678266	110.604	7.85656	2.73961e-09	1.4924e-05	34678266	NADH dehydrogenase subunit 4L
GeneID:101259700	28.5071	7.1917	1.43288e-05	0.00622869	101259700	disease resistance protein RPM1-like
GeneID:101263726	12.8528	6.86481	3.67246e-05	0.00889144	101263726	cytochrome P450 CYP72A219-like
GeneID:101246741	105.014	6.82206	9.50124e-07	0.00115018	101246741	transcription factor TCP2-like
GeneID:101250573	2481.38	6.70848	2.44235e-13	2.66094e-09	101250573
GeneID:101249640	9.24628	6.6722	0.000124958	0.0151269	101249640	probable polyamine oxidase 5
GeneID:101252396	7.34058	6.64712	0.000231541	0.0182338	101252396	uncharacterized protein LOC101252396
GeneID:101246885	63.7505	6.46261	3.21285e-06	0.00205906	101246885	actin-related protein 7
GeneID:101244782	152.791	6.45832	3.06627e-05	0.00875714	101244782	bifunctional dethiobiotin synthetase/7,8-diamino-pelargonic acid aminotransferase, mitochondrial
GeneID:101265094	85.5947	6.42274	3.36261e-05	0.00889144	101265094	membrane protein PM19L
GeneID:100125904	12.676	6.41922	9.68897e-05	0.0131952	100125904	cinnamoyl-CoA reductase
GeneID:101267090	111.934	6.29088	2.95765e-05	0.00875714	101267090	DNA repair protein RAD5A isoform X1
GeneID:101259452	7.24952	6.28996	0.000534528	0.0263307	101259452
GeneID:101249293	8.03819	6.19946	0.000371116	0.0229497	101249293	protein FAF-like, chloroplastic
GeneID:101258153	65.0086	6.17711	3.25541e-07	0.000591129	101258153	putative pentatricopeptide repeat-containing protein At1g13630 isoform X1
GeneID:101259896	150.22	6.04075	6.92782e-05	0.0115873	101259896	ABSCISIC ACID-INSENSITIVE 5-like protein 2
GeneID:101257780	115.059	6.03063	4.21081e-07	0.000655383	101257780	phosphatidyl-N-methylethanolamine N-methyltransferase
GeneID:101251722	211.886	6.01163	1.48377e-05	0.00622869	101251722	potassium channel AKT2/3 isoform X2
GeneID:101254191	7.16111	6.00579	0.000768782	0.0294556	101254191	regulatory protein NPR5
GeneID:101265896	13.9677	5.9885	0.000121279	0.0148832	101265896	protein kinase PINOID 2
GeneID:101258168	81.3152	5.97665	2.12096e-05	0.00705668	101258168	transcriptional adapter ADA2 isoform X2
GeneID:104647156	12.6533	5.92469	0.000273035	0.0193164	104647156	protein NETWORKED 2A-like
GeneID:101261110	32.6382	5.91292	9.31799e-05	0.013074	101261110	DNA excision repair protein ERCC-1 isoform X2
GeneID:101243829	27.2195	5.90968	0.000179871	0.0167567	101243829	uncharacterized protein LOC101243829
GeneID:101268599	11.4857	5.78465	0.000411763	0.0238626	101268599	pentatricopeptide repeat-containing protein At1g79490, mitochondrial
GeneID:101251002	137.021	5.76985	6.9762e-07	0.000950071	101251002	ABC transporter G family member 32-like
GeneID:100316890	15.7157	5.7403	0.000209988	0.017862	100316890	auxin response factor 6
GeneID:543695	16.7266	5.61428	0.00015806	0.0161085	543695	knotted homeodomain protein 4
GeneID:101250936	105.816	5.5432	5.91455e-05	0.0106064	101250936	RNA polymerase II-associated protein 3 isoform X1
GeneID:101258635	7.72352	5.53668	0.000927443	0.0311381	101258635	putative cyclin-A3-1
GeneID:112941381	785.846	5.5195	4.62978e-08	0.000168138	112941381
GeneID:101262952	51.6546	5.50142	0.00041794	0.0240924	101262952	heat shock factor-binding protein-like
GeneID:101250452	92.2605	5.44346	0.000212414	0.017862	101250452	ATP-dependent DNA helicase Q-like SIM isoform X5
GeneID:101251607	186.544	5.40367	7.43968e-06	0.00375514	101251607	leucoanthocyanidin dioxygenase isoform X2
GeneID:101252307	38.7796	5.39908	0.000199139	0.0176392	101252307	serine racemase-like
GeneID:104649135	23.6879	5.32249	0.000729765	0.0292792	104649135	uncharacterized protein LOC104649135
GeneID:101264090	20.596	5.299	0.000141404	0.0155295	101264090	sister chromatid cohesion 1 protein 2 isoform X2
GeneID:101243902	70.741	5.29816	0.000619758	0.0276732	101243902	probable WRKY transcription factor 32
GeneID:101250329	12.7453	5.28122	0.000536134	0.0263307	101250329	phosphatidylinositol/phosphatidylcholine transfer protein SFH11
GeneID:101268559	9.16136	5.27763	0.000851691	0.0302864	101268559	zinc finger protein 3
GeneID:101246977	116.725	5.25304	6.97691e-05	0.0115873	101246977	TMV resistance protein N-like isoform X1
GeneID:101252838	172.961	5.24937	4.4992e-05	0.00891251	101252838	external alternative NAD(P)H-ubiquinone oxidoreductase B2, mitochondrial
GeneID:101262373	147.319	5.23006	9.58912e-05	0.0131952	101262373	aspartic proteinase PCS1
GeneID:101244709	49.7292	5.22072	0.000454177	0.0251181	101244709	preprotein translocase subunit SECE1
GeneID:109118721	12.4397	5.22045	0.0002452	0.0182976	109118721	probable LRR receptor-like serine/threonine-protein kinase At3g47570
GeneID:101249048	159.683	5.19849	3.37938e-05	0.00889144	101249048	pre-mRNA cleavage factor Im 25 kDa subunit 2
GeneID:101249986	30.3563	5.18933	2.13741e-05	0.00705668	101249986	heavy metal-associated isoprenylated plant protein 3
GeneID:101264469	182.606	5.13506	0.00041134	0.0238626	101264469	soluble inorganic pyrophosphatase 6, chloroplastic isoform X1
GeneID:101253269	97.6439	5.12567	5.9384e-05	0.0106064	101253269	SRSF protein kinase 1
GeneID:104648398	855.793	5.12485	2.83757e-06	0.00204967	104648398
GeneID:104648410	236.635	5.1127	2.42192e-07	0.000527737	104648410
GeneID:101264813	133.97	5.10886	1.63173e-06	0.00161265	101264813	F-box/LRR-repeat protein At5g63520 isoform X4
GeneID:101055510	192.692	5.10582	2.58071e-06	0.00200835	101055510	Hop-interacting protein THI006
GeneID:112941194	7.5174	5.10212	0.0027888	0.0463427	112941194
GeneID:101257639	25.4997	5.08247	0.000592545	0.0272396	101257639	transcription factor BEE 1-like
GeneID:101265229	189.869	5.08109	3.01008e-06	0.00204967	101265229
GeneID:101252551	62.952	5.06812	0.000536522	0.0263307	101252551	cation-chloride cotransporter 1 isoform X1
GeneID:101264505	13.7972	5.04219	0.0020334	0.0415746	101264505	protein LIFEGUARD 2
GeneID:101267393	120.371	5.03534	0.00023263	0.0182338	101267393	protein NRT1/ PTR FAMILY 2.11
GeneID:101259850	166.712	5.01803	0.000701628	0.0288462	101259850	uncharacterized protein LOC101259850
GeneID:101244433	12.5766	5.00787	0.00215701	0.0423541	101244433	protein NUCLEAR FUSION DEFECTIVE 4
GeneID:101245283	75.8147	4.99313	5.72721e-05	0.0105759	101245283	peptidyl-prolyl cis-trans isomerase CYP18-2
GeneID:101250382	12.8847	4.97996	0.000789327	0.0294556	101250382	probable glucan 1,3-beta-glucosidase A
GeneID:101267688	66.814	4.97329	0.000658877	0.0283734	101267688	MADS-box protein SOC1-like
GeneID:101249615	153.317	4.96448	3.08683e-05	0.00875714	101249615	1-acyl-sn-glycerol-3-phosphate acyltransferase 2
GeneID:101261877	104.206	4.94996	0.000248342	0.018406	101261877	pentatricopeptide repeat-containing protein At1g10910, chloroplastic isoform X2
GeneID:101261163	126.154	4.89511	9.93084e-05	0.0132569	101261163	F-box/LRR-repeat protein 3
GeneID:101267700	76.9963	4.88494	1.3555e-05	0.00622869	101267700	uncharacterized protein LOC101267700 isoform X2
GeneID:101260896	67.1918	4.86337	8.94921e-05	0.0128292	101260896	uncharacterized protein LOC101260896
GeneID:104645696	15.7312	4.86217	0.00115282	0.0332275	104645696
GeneID:101254717	12.5653	4.843	0.000931305	0.0311381	101254717	uncharacterized protein LOC101254717
GeneID:101253678	96.0743	4.83706	0.00067439	0.0287011	101253678	uncharacterized protein LOC101253678 isoform X2
GeneID:100316872	205.593	4.82076	0.000763029	0.0294556	100316872	atypical receptor-like kinase 1 precursor
GeneID:543715	11.0715	4.80988	0.00143405	0.0360831	543715
GeneID:101256611	203.265	4.80028	1.27392e-06	0.00138793	101256611	uncharacterized protein LOC101256611
GeneID:101267114	171.714	4.77649	0.00019749	0.0176365	101267114	mannosyl-oligosaccharide glucosidase GCS1
GeneID:101265921	96.4198	4.77003	0.000521325	0.0263307	101265921	receptor protein kinase-like protein ZAR1
GeneID:778210	13.8507	4.7196	0.00148124	0.0363297	778210	hexokinase
GeneID:101261262	72.3743	4.71674	4.17923e-05	0.00891251	101261262	protein blind-like1
GeneID:101261701	13.9843	4.71087	0.000816007	0.0297151	101261701	O-fucosyltransferase 13 isoform X1
GeneID:109121166	6.19735	4.70725	0.0058718	0.0626575	109121166
GeneID:101260093	46.4223	4.67716	0.000533608	0.0263307	101260093	anthocyanidin 3-O-glucosyltransferase
GeneID:101259126	195.446	4.66393	0.000375581	0.0229497	101259126	ankyrin repeat protein SKIP35-like isoform X2
GeneID:101267305	76.0868	4.65423	0.000282123	0.0195779	101267305	O-fucosyltransferase 9 isoform X1
GeneID:101259489	146.01	4.65178	0.000145499	0.0155413	101259489	chloride channel protein CLC-e isoform X1
GeneID:101055531	66.9372	4.63771	0.000634737	0.0279933	101055531	Hop-interacting protein THI115
GeneID:107648860	607.514	4.63013	2.14437e-07	0.000527737	107648860
GeneID:101251001	102.569	4.61827	4.12201e-05	0.00891251	101251001	lysine--tRNA ligase
GeneID:101268166	14.2878	4.6166	0.0015187	0.0366327	101268166	pentatricopeptide repeat-containing protein At5g55840
GeneID:101266856	78.9789	4.61376	1.61118e-05	0.00626922	101266856	UDP-glycosyltransferase 86A1-like
GeneID:104648765	6.74029	4.60239	0.00535264	0.0615531	104648765
GeneID:101249109	16.6333	4.59951	0.00207037	0.0417088	101249109	formin-like protein 2
GeneID:112940246	9.01676	4.58992	0.00630467	0.064755	112940246
GeneID:101251896	6.37088	4.57965	0.00360273	0.0521344	101251896	O-fucosyltransferase 29
GeneID:101261475	6.65678	4.54894	0.00557567	0.0618062	101261475	BTB/POZ domain-containing protein At3g49900
GeneID:101252120	112.536	4.53903	0.000753409	0.0294556	101252120	uncharacterized protein LOC101252120
GeneID:3950380	39.6142	4.5351	0.00270035	0.045953	3950380	NADH-plastoquinone oxidoreductase subunit 4L
GeneID:101266380	103.708	4.52628	0.000132128	0.0154789	101266380	uncharacterized protein LOC101266380
GeneID:101245998	18.8847	4.51938	0.00246559	0.0446223	101245998	abscisic acid receptor PYL4-like
GeneID:101264597	25.4636	4.49548	0.00549562	0.0618062	101264597	leucine-rich repeat receptor-like serine/threonine-protein kinase BAM1
GeneID:34678297	34.3107	4.45536	4.23346e-05	0.00891251	34678297	NADH dehydrogenase subunit 9
GeneID:101250463	8.29267	4.43704	0.00430429	0.0562504	101250463	E3 ubiquitin-protein ligase WAVH1-like isoform X1
GeneID:101244888	296.057	4.43593	7.83131e-05	0.0123655	101244888	histone-lysine N-methyltransferase ATXR3
GeneID:101266059	111.395	4.43031	4.10812e-05	0.00891251	101266059	ferredoxin C 2, chloroplastic
GeneID:101259135	21.2871	4.4	0.000803646	0.0295801	101259135	E3 ubiquitin-protein ligase RING1-like
GeneID:34678300	8.58349	4.36683	0.0121035	0.0892576	34678300	succinate dehydrogenase subunit 3
GeneID:543651	157.826	4.36015	0.000272269	0.0193164	543651	aldehyde oxidase
GeneID:544207	345.825	4.3396	3.5969e-05	0.00889144	544207	amino acid transporter isoform X1
GeneID:101249360	8.86069	4.31788	0.00685789	0.0677901	101249360	U-box domain-containing protein 19-like
GeneID:101267449	190.644	4.31748	0.000173796	0.0167567	101267449	TNF receptor-associated factor homolog 1b-like isoform X4
GeneID:101262480	104.473	4.31303	0.000648191	0.0283535	101262480	Abhydrolase superfamily protein
GeneID:101248126	160.588	4.30985	0.000820797	0.0297151	101248126	uncharacterized protein LOC101248126
GeneID:101258969	168.291	4.30892	0.000293048	0.0198417	101258969	uncharacterized protein LOC101258969
GeneID:104648605	9.31671	4.30633	0.00509576	0.060346	104648605
GeneID:101243975	8.43786	4.29789	0.00555365	0.0618062	101243975	probable amino-acid racemase
GeneID:101254042	70.5036	4.29381	0.00316589	0.048856	101254042	probable flavin-containing monooxygenase 1
GeneID:101262212	57.0887	4.29105	0.00473536	0.0589305	101262212	protein NRT1/ PTR FAMILY 1.2-like
GeneID:101265006	126.974	4.2465	0.000164944	0.0163369	101265006	zinc protease PQQL-like
GeneID:101266074	7.21677	4.23978	0.00494808	0.0598906	101266074	phenylalanine--tRNA ligase alpha subunit, cytoplasmic
GeneID:101250213	58.7933	4.23039	8.36713e-05	0.0127338	101250213	probable sulfate transporter 3.3
GeneID:101253281	133.187	4.22393	0.000179948	0.0167567	101253281	uncharacterized protein LOC101253281 isoform X2
GeneID:101265129	29.1818	4.21037	0.00357345	0.0519382	101265129	uncharacterized PKHD-type hydroxylase At1g22950
GeneID:101267729	25.398	4.20936	0.00223254	0.0428231	101267729	subtilisin-like protease SBT1.2
GeneID:101257938	10.851	4.20172	0.0108054	0.0848165	101257938	probable folate-biopterin transporter 7
GeneID:101251921	89.5423	4.18936	0.00634126	0.0649934	101251921	cyclin-U4-1
GeneID:101251874	61.1904	4.18535	0.00409843	0.054721	101251874	uncharacterized protein LOC101251874
GeneID:34678312	723.656	4.17062	0.000293395	0.0198417	34678312	ribosomal protein S10
GeneID:101246728	73.8037	4.16985	0.00479432	0.0590013	101246728	solute carrier family 35 member F2
GeneID:778259	25.0153	4.12582	0.00468178	0.0587649	778259
GeneID:101262642	37.7591	4.11827	0.00207009	0.0417088	101262642	protein trichome birefringence-like 23
GeneID:101253680	119.053	4.11798	0.00391765	0.0541354	101253680	uncharacterized WD repeat-containing protein C17D11.16
GeneID:101264131	16.474	4.11722	0.00495494	0.0598906	101264131	uncharacterized protein At2g34160-like
GeneID:101261675	90.4866	4.11593	0.00988545	0.0815924	101261675	UDP-glycosyltransferase 73C3-like
GeneID:101260176	38.9342	4.09123	0.00518879	0.0608523	101260176	protein NRT1/ PTR FAMILY 5.2 isoform X1
GeneID:101260449	14.5534	4.085	0.00405791	0.0547166	101260449	pollen-specific leucine-rich repeat extensin-like protein 1
GeneID:101243934	65.8087	4.07995	0.000656488	0.0283734	101243934	telomere length regulation protein TEL2 homolog
GeneID:101267121	111.366	4.07735	0.000637205	0.0279933	101267121	casein kinase 1-like protein 10
GeneID:34678265	144.714	4.06924	2.34435e-05	0.00751225	34678265	ATP synthase subunit 4
GeneID:101267108	159.604	4.06677	0.000143891	0.0155295	101267108	uncharacterized protein LOC101267108
GeneID:101251820	130.535	4.05419	0.00120783	0.0337419	101251820	transcription factor VOZ1
GeneID:101250305	109.306	4.04168	0.000991447	0.0318638	101250305	E3 ubiquitin-protein ligase UPL5
GeneID:101252126	12.258	4.0405	0.00682362	0.0676317	101252126	nuclear intron maturase 1, mitochondrial
GeneID:101253090	10.8635	4.03773	0.00844827	0.0758187	101253090	uncharacterized protein LOC101253090
GeneID:101253956	142.233	4.02947	0.00455745	0.0579939	101253956	pre-mRNA-splicing factor CWC25 homolog
GeneID:101243859	130.387	4.01596	0.00100801	0.0318972	101243859	protein TRAUCO isoform X2
GeneID:101260372	86.4387	4.01419	0.000964991	0.0315262	101260372	protein kinase and PP2C-like domain-containing protein
GeneID:778282	43.1705	4.00167	0.00233908	0.0435629	778282	histone H2B.1
GeneID:101262607	9.72676	3.99998	0.011282	0.0865065	101262607	L-tryptophan--pyruvate aminotransferase 1-like
GeneID:101249659	160.921	3.99024	0.000827995	0.0297723	101249659	peroxisome biogenesis protein 22
GeneID:778341	91.5898	3.96742	0.0024323	0.0443663	778341
GeneID:101267873	101.25	3.95846	0.000400842	0.0237087	101267873	NAC domain-containing protein 82-like
GeneID:101254271	14.3688	3.95794	0.00488885	0.0594991	101254271	protein LATERAL ROOT PRIMORDIUM 1 isoform X2
GeneID:101263700	106.863	3.95646	0.00227325	0.0430019	101263700	transcription factor VIP1
GeneID:104645983	57.2542	3.92404	0.00271248	0.045953	104645983	la-related protein 1C isoform X1
GeneID:101256101	6.77018	3.89515	0.0138118	0.0955426	101256101	probable inactive purple acid phosphatase 27 isoform X1
GeneID:101267715	45.8712	3.88888	0.00443632	0.0574957	101267715	protein EMBRYO SAC DEVELOPMENT ARREST 30
GeneID:101264233	103.215	3.88403	5.66014e-05	0.0105759	101264233	lyst-Interacting Protein5-like protein
GeneID:101245031	185.97	3.88187	0.00604259	0.0636077	101245031	nucleosome assembly protein 1;2 isoform X2
GeneID:101259385	146.762	3.87354	0.000946496	0.0312955	101259385	UBP1-associated protein 2A-like
GeneID:109119036	9.53813	3.86556	0.00557665	0.0618062	109119036
GeneID:778225	20.5846	3.85702	0.0120954	0.0892576	778225	isochorismate synthase isoform X2
GeneID:109120909	98.7601	3.85247	0.000766903	0.0294556	109120909	uncharacterized protein LOC109120909
GeneID:101247559	20.6495	3.84792	0.00376423	0.0529913	101247559	F-box/kelch-repeat protein
GeneID:104649213	10.8791	3.84507	0.0127708	0.0920836	104649213
GeneID:101250385	11.6541	3.84338	0.0150179	0.0992727	101250385	la-related protein 6B-like isoform X3
GeneID:101264275	194.491	3.83616	0.000628218	0.0279365	101264275	protein CROWDED NUCLEI 1
GeneID:101264110	67.0326	3.83389	8.58033e-05	0.0128058	101264110	uncharacterized protein LOC101264110
GeneID:101268569	35.4425	3.82307	0.00272386	0.045953	101268569	uncharacterized protein LOC101268569
GeneID:101247702	323.879	3.81514	0.000692221	0.0288462	101247702	serine/arginine-rich splicing factor SR34A
GeneID:101255687	14.5324	3.80866	0.00525482	0.0610212	101255687	uncharacterized protein LOC101255687
GeneID:101255059	43.36	3.80561	0.00226301	0.0429538	101255059	copper-transporting ATPase HMA4-like
GeneID:101257478	42.1539	3.79934	0.00581127	0.0624153	101257478	pleckstrin homology domain-containing protein 1
GeneID:101254158	130.285	3.79731	0.00308696	0.0482532	101254158	VQ motif-containing protein 4
GeneID:101254956	160.565	3.79161	0.00211913	0.0421255	101254956	BTB/POZ domain-containing protein At4g08455
GeneID:101244415	290.081	3.78904	0.00199904	0.0412874	101244415	cysteine synthase
GeneID:107546762	117.199	3.78868	0.000741785	0.0294556	107546762
GeneID:101257022	12.2185	3.78495	0.00630611	0.064755	101257022	pentatricopeptide repeat-containing protein At2g15630, mitochondrial
GeneID:101245922	52.0324	3.75948	0.000701382	0.0288462	101245922	peroxisome biogenesis protein 22
GeneID:101256231	229.524	3.74588	0.000862011	0.0304922	101256231	superoxide dismutase Fe
GeneID:101264535	30.732	3.74369	0.00184493	0.0396514	101264535	THO complex subunit 6 isoform X2
GeneID:101245139	15.0885	3.73973	0.0056531	0.0620663	101245139	uncharacterized protein LOC101245139
GeneID:101263252	51.5109	3.73549	0.00689132	0.0678851	101263252	probable serine/threonine-protein kinase At1g09600
GeneID:101252613	78.2154	3.73222	0.00202832	0.0415746	101252613	probable E3 ubiquitin-protein ligase RHB1A
GeneID:101252623	30.9017	3.72459	0.00968472	0.0806273	101252623	uncharacterized protein LOC101252623
GeneID:101250171	61.1869	3.71542	0.00594429	0.0631181	101250171	pterin-4-alpha-carbinolamine dehydratase 2, mitochondrial isoform X2
GeneID:101246738	116.554	3.71474	0.00049212	0.0262972	101246738	protein NLP9-like
GeneID:101262126	8.39175	3.70856	0.00983777	0.0813838	101262126	uncharacterized protein LOC101262126 isoform X1
GeneID:101257235	52.9147	3.70535	0.00748741	0.0713962	101257235	phospholipase A I
GeneID:101258588	221.425	3.69529	0.000495903	0.0262972	101258588	ACT domain-containing protein ACR10
GeneID:101254794	17.9255	3.67782	0.00478639	0.0590013	101254794
GeneID:109120968	24.069	3.66925	0.00642475	0.0655214	109120968
GeneID:101251906	10.8895	3.62217	0.00555781	0.0618062	101251906	transmembrane 9 superfamily member 9
GeneID:543990	4036.29	3.60495	1.51487e-05	0.00622869	543990
GeneID:101247578	248.092	3.58643	0.00102831	0.0321937	101247578	copper transport protein ATX1 isoform X1
GeneID:101257126	37.3094	3.57291	0.00548776	0.0618062	101257126	aldose 1-epimerase
GeneID:101257874	13.2809	3.57126	0.00841756	0.0756678	101257874	protein APEM9
GeneID:101263794	61.6013	3.5675	0.00111936	0.0328717	101263794	regulator of MON1-CCZ1 complex
GeneID:101260288	52.1903	3.56169	0.00313431	0.0487137	101260288	caffeic acid 3-O-methyltransferase 1
GeneID:104648383	17.3231	3.5554	0.00932689	0.0788947	104648383
GeneID:100736465	104.115	3.51117	0.000380336	0.0229497	100736465	histone-lysine N-methyltransferase ATX2
GeneID:101250424	15.6872	3.51026	0.0100684	0.0822771	101250424	ATP-dependent DNA helicase Q-like 3 isoform X1
GeneID:101250039	76.9783	3.50521	0.00823936	0.0752014	101250039	hypersensitive-induced response protein 1
GeneID:101261662	182.367	3.50303	0.000299593	0.0200249	101261662	protein LHY isoform X1
GeneID:101249586	59.9012	3.48679	0.00161537	0.0376861	101249586	putative GPI-anchor transamidase
GeneID:101266661	26.885	3.48399	0.00621885	0.0642869	101266661	LOW QUALITY PROTEIN
GeneID:101247070	169.899	3.48384	0.00088809	0.0309129	101247070	40S ribosomal protein S12 isoform X1
GeneID:101246196	10.3463	3.48035	0.0146881	0.0982676	101246196
GeneID:34678303	19.7578	3.47526	0.00297841	0.047596	34678303	ribosomal protein L10
GeneID:101253239	138.503	3.46156	0.000428488	0.0243145	101253239	myosin-1
GeneID:101260375	104.038	3.44771	0.00480718	0.0590013	101260375	uncharacterized protein LOC101260375 isoform X1
GeneID:101262778	110.986	3.44386	0.00195618	0.0407506	101262778	cytokinin riboside 5'-monophosphate phosphoribohydrolase LOG3
GeneID:544273	96.3465	3.4375	0.00571469	0.0621877	544273	3-dehydroquinate synthase, chloroplastic
GeneID:101257693	11.9833	3.43091	0.0136904	0.0951865	101257693	PLASMODESMATA CALLOSE-BINDING PROTEIN 1
GeneID:100736467	22.5531	3.41944	0.0101194	0.0822771	100736467	somatic embryogenesis receptor kinase 3A precursor
GeneID:101245098	149.082	3.41714	0.00284524	0.0466933	101245098	1-aminocyclopropane-1-carboxylate oxidase homolog
GeneID:101249243	117.259	3.41569	0.0107988	0.0848165	101249243	gamma carbonic anhydrase-like 2, mitochondrial
GeneID:101250994	13.494	3.41285	0.0147117	0.0983296	101250994	uncharacterized protein LOC101250994 isoform X3
GeneID:101250928	12.0288	3.40208	0.00710786	0.0688169	101250928	uncharacterized protein LOC101250928
GeneID:101243878	17.9045	3.39339	0.0118978	0.088936	101243878	uncharacterized protein LOC101243878
GeneID:101265569	70.2664	3.39026	0.0142336	0.0972257	101265569	uncharacterized protein At2g33490 isoform X1
GeneID:101266921	14.9532	3.38061	0.0136031	0.0948212	101266921	nuclear pore complex protein NUP96
GeneID:101259764	109.671	3.37184	0.000185909	0.0171358	101259764	B3 domain-containing transcription factor VRN1-like isoform X3
GeneID:101266300	51.6262	3.36758	0.00124414	0.0337704	101266300	feruloyl CoA ortho-hydroxylase 2
GeneID:101244846	33.9534	3.35905	0.00645292	0.0655214	101244846	transcription termination factor MTEF18, mitochondrial-like
GeneID:101262009	61.2073	3.3565	0.00840775	0.0756678	101262009	ribulose-phosphate 3-epimerase, cytoplasmic isoform
GeneID:101245440	44.575	3.35408	0.00848096	0.0759771	101245440	peroxisome biogenesis protein 3-2
GeneID:101244833	52.3469	3.3437	0.000933226	0.0311381	101244833	uncharacterized protein LOC101244833
GeneID:101266730	29.2688	3.33698	0.00784444	0.0730472	101266730	dolichol kinase EVAN isoform X1
GeneID:101251066	37.2584	3.30034	0.00174964	0.0385668	101251066	eukaryotic peptide chain release factor subunit 1-3
GeneID:101263234	95.975	3.28815	0.0148294	0.0984817	101263234	mitochondrial adenine nucleotide transporter ADNT1
GeneID:101245477	38.4717	3.28596	0.00363291	0.0521459	101245477	dynamin-related protein 3A isoform X3
GeneID:101264543	53.8768	3.28588	0.00677537	0.0674134	101264543	uncharacterized protein LOC101264543
GeneID:101249217	60.0861	3.27532	0.0030699	0.0482532	101249217	uncharacterized protein LOC101249217 isoform X1
GeneID:101261066	17.3936	3.26376	0.0103913	0.0832666	101261066	actin-related protein 2/3 complex subunit 5A
GeneID:101264420	199.255	3.25499	0.00620543	0.0642663	101264420	methionine aminopeptidase 1B, chloroplastic
GeneID:101258480	97.1026	3.25494	0.00219439	0.0425204	101258480	mRNA-capping enzyme-like isoform X2
GeneID:101250262	334	3.25341	0.00156818	0.0374677	101250262	probable calcium-binding protein CML36
GeneID:101256979	117.97	3.24937	0.00562272	0.0619408	101256979	protein EDS1
GeneID:104645175	25.0554	3.21525	0.00975433	0.0809413	104645175
GeneID:101260404	111.258	3.20629	0.00608353	0.0637894	101260404	TNF receptor-associated factor homolog 1b-like
GeneID:101261602	20.2331	3.19826	0.00358086	0.0519486	101261602	uncharacterized protein LOC101261602
GeneID:34678270	114.736	3.17922	0.00671595	0.0671903	34678270	succinate dehydrogenase subunit 4
GeneID:544143	162.738	3.16878	0.00362707	0.0521344	544143
GeneID:543771	14.5369	3.13863	0.00676736	0.0674134	543771
GeneID:101249013	85.4315	3.12241	0.0118066	0.0887121	101249013	putative methyltransferase C9orf114 isoform X2
GeneID:101265979	52.3724	3.10924	0.00474249	0.0589305	101265979	uncharacterized protein LOC101265979 isoform X2
GeneID:101253654	171.054	3.0996	0.00309661	0.0483346	101253654	amino acid transporter AVT6A
GeneID:34678304	147.51	3.08662	0.00226075	0.0429538	34678304	ribosomal protein L2
GeneID:104648235	24.352	3.02733	0.00562129	0.0619408	104648235
GeneID:101264419	136.378	3.02391	0.00690937	0.0680014	101264419	probable disease resistance protein At4g33300
GeneID:101245794	128.93	3.0178	0.00420215	0.055374	101245794	60S ribosomal protein L22-2
GeneID:101258871	20.0455	3.0072	0.00500154	0.0600129	101258871	uncharacterized protein LOC101258871
GeneID:101266303	35.3349	2.99049	0.00749013	0.0713962	101266303	putative septum site-determining protein minD homolog, chloroplastic
GeneID:3950457	135.952	2.97493	0.00242078	0.0443663	3950457	RNA polymerase beta' subunit
GeneID:101259331	40.5865	2.97485	0.00833017	0.0752847	101259331	F-box protein At5g39450
GeneID:101260026	99.0519	2.96897	0.0144942	0.0978402	101260026	ABC transporter B family member 26, chloroplastic isoform X1
GeneID:101247398	182.413	2.90639	0.00107183	0.0325023	101247398	BEL1-like homeodomain protein 1
GeneID:101252579	48.9811	2.90404	0.0103032	0.0827825	101252579	uncharacterized protein LOC101252579
GeneID:101251344	36.9542	2.8942	0.0129988	0.0928058	101251344	protein IQ-DOMAIN 1
GeneID:101267267	92.5142	2.89298	0.0102505	0.0827223	101267267	transcription factor UNE12
GeneID:34678321	147.871	2.89121	0.00269	0.045953	34678321	ribosomal protein L2
GeneID:101263740	150.163	2.88227	0.00686301	0.0677901	101263740	fasciclin-like arabinogalactan protein 17
GeneID:101252535	47.2928	2.86734	0.00507839	0.0602748	101252535	E3 ubiquitin-protein ligase MBR2 isoform X2
GeneID:101244561	175.345	2.85771	0.00263488	0.0456391	101244561	alanine--tRNA ligase
GeneID:101251886	28.1171	2.83847	0.00722123	0.0695012	101251886	uncharacterized protein LOC101251886
GeneID:101259435	100.922	2.83414	0.0079036	0.0732849	101259435	probable serine/threonine-protein kinase At1g01540
GeneID:101266168	184.766	2.83373	0.00786342	0.0730662	101266168	vacuolar-sorting receptor 3
GeneID:101268413	142.069	2.82869	0.0030004	0.047765	101268413	zinc finger protein CONSTANS-LIKE 4-like
GeneID:3950471	86.6613	2.8227	0.0033534	0.0507435	3950471	ribosomal protein L23
GeneID:101266812	118.883	2.81192	0.0119343	0.088936	101266812	caffeoylshikimate esterase
GeneID:101264440	92.6236	2.77315	0.010263	0.0827223	101264440	CBL-interacting serine/threonine-protein kinase 6
GeneID:101253764	111.854	2.76615	0.00340308	0.0508586	101253764	probable protein phosphatase 2C 59
GeneID:101257821	160.563	2.76521	0.00595673	0.0631309	101257821	BTB/POZ domain-containing protein SR1IP1
GeneID:101261306	87.855	2.75669	0.00530716	0.0613816	101261306	chaperone protein dnaJ 49
GeneID:101244909	219.438	2.7533	0.00203774	0.0415752	101244909	protein LNK1 isoform X2
GeneID:101261454	134.173	2.74446	0.00411378	0.054743	101261454	protein transport protein SEC31 homolog B isoform X1
GeneID:101267023	94.0002	2.73918	0.00549672	0.0618062	101267023	uncharacterized protein LOC101267023
GeneID:101254359	18.82	2.73579	0.0119287	0.088936	101254359	ABC transporter I family member 10 isoform X2
GeneID:101260990	73.3884	2.73243	0.00711855	0.0688169	101260990	salicylic acid-binding protein 2
GeneID:101262189	147.008	2.69817	0.00467347	0.0587283	101262189	ras-related protein RABH1e-like
GeneID:101244750	79.3829	2.68568	0.00615864	0.064001	101244750	casein kinase II subunit alpha-2
GeneID:3950452	488.697	2.67398	0.00251214	0.0452237	3950452	NADH-plastoquinone oxidoreductase subunit 1
GeneID:100191131	164.873	2.67077	0.00806126	0.0742413	100191131	auxin response factor 7 isoform X1
GeneID:101249170	161.029	2.65468	0.00525799	0.0610212	101249170	ATP synthase subunit beta, mitochondrial
GeneID:104646390	127.955	2.64363	0.00866214	0.0762926	104646390	cytochrome b5 isoform A
GeneID:101245875	102.157	2.63486	0.00899106	0.0780263	101245875	TOM1-like protein 6
GeneID:101257132	202.206	2.63276	0.0117391	0.0883269	101257132	induced stolen tip protein TUB8-like isoform 1
GeneID:101263808	162.235	2.58733	0.014414	0.0975409	101263808	uncharacterized protein LOC101263808
GeneID:101250766	37.1252	2.57597	0.00701743	0.0683243	101250766	BES1/BZR1 homolog protein 4 isoform X3
GeneID:101259548	118.052	2.56789	0.0104271	0.0832666	101259548	leucine-rich repeat receptor-like serine/threonine/tyrosine-protein kinase SOBIR1 precursor
GeneID:3950436	436.316	2.56531	0.00644724	0.0655214	3950436
GeneID:101263349	113.581	2.55288	0.0121625	0.0893531	101263349	zinc finger CCCH domain-containing protein 53 isoform X3
GeneID:544104	114.72	2.55025	0.00725989	0.0698116	544104	lycopene beta cyclase, chloroplastic
GeneID:112940625	44.1653	2.5309	0.00903447	0.0781815	112940625	uncharacterized protein LOC112940625
GeneID:101256513	131.239	2.5051	0.0112447	0.0863969	101256513	acetyl-coenzyme A carboxylase carboxyl transferase subunit alpha, chloroplastic
GeneID:3950481	66.9932	2.50487	0.00865403	0.0762829	3950481	hypothetical chloroplast RF2
GeneID:101261294	207.017	2.49943	0.00450054	0.0578906	101261294	LOW QUALITY PROTEIN
GeneID:101260464	97.769	2.48945	0.0127925	0.0921176	101260464	uncharacterized protein LOC101260464
GeneID:101262583	101.013	2.48717	0.00572784	0.0622182	101262583	serine/threonine-protein kinase/endoribonuclease IRE1a isoform X1
GeneID:34678316	151.892	2.48196	0.00476529	0.0589305	34678316	NADH dehydrogenase subunit 7
GeneID:101262091	61.0864	2.46769	0.00698766	0.06826	101262091	trihelix transcription factor GT-2-like
GeneID:101253706	168.869	2.44298	0.00986099	0.081514	101253706	ABC transporter C family member 2 isoform X1
GeneID:100736548	93.9894	2.43702	0.00711512	0.0688169	100736548	mitogen-activated protein kinase 14 isoform X1
GeneID:101248607	67.8697	2.43155	0.0143131	0.0972638	101248607	probable E3 ubiquitin-protein ligase LOG2
GeneID:101247803	96.6587	2.40441	0.00894829	0.0777445	101247803	ubiquitin-conjugating enzyme E2 2
GeneID:101252062	68.865	2.39664	0.0107895	0.0848165	101252062	uncharacterized protein LOC101252062
GeneID:16976779	87.8125	2.39067	0.00949168	0.0796088	16976779	ribosomal protein L23
GeneID:101260160	159.084	2.28835	0.011924	0.088936	101260160
